# Supplementary material for: Multifactor assessment of ovarian cancer reveals immunologically interpretable molecular subtypes with distinct prognoses
Source: Front Immunol. 2023 Dec 7;14:1326018. doi: 10.3389/fimmu.2023.1326018 (PMC10740166; doi:10.3389/fimmu.2023.1326018)
Supplement: Supplementary file 3 [file Table_2.xlsx]

## Sheet: 1273SRGs
Table S2. Results of Continuous Cox Analysis and Grouped Cox Analysis for 1273 SRGs in TCGA.
gene	HR_group	p_group	HR	p	logrank_p
EEF2	1.43815	0.00364077	1	0.249513	0.00347423
CALR	0.75231	0.0226703	0.999997	0.434417	0.0221814
TUBB	0.757206	0.024933	0.999997	0.156496	0.0244476
PABPC1	1.29534	0.0366078	1	0.128078	0.0362437
GNAS	0.706127	0.00510473	0.999996	0.0239825	0.0048479
PFN1	0.759362	0.025747	0.999995	0.123223	0.0252115
MYL6	0.779484	0.0449333	0.999996	0.152728	0.0442992
YBX1	0.766542	0.03204	0.999997	0.355053	0.0316271
CTSD	1.37081	0.0112321	1	0.128025	0.0108383
PCBP2	0.691877	0.00320517	0.999987	0.0369893	0.0030338
P4HB	0.784239	0.0495318	0.999995	0.251044	0.0490375
TPM3	0.607689	6.71741e-05	0.999951	3.99895e-05	5.67826e-05
HDGF	0.789484	0.0563028	0.99999	0.156483	0.0376727
ATP1A1	1.31201	0.0285318	1.00001	0.0925425	0.0283135
HNRNPA2B1	0.765657	0.0325503	0.99998	0.0208094	0.031866
LDHA	0.753824	0.0227763	0.999998	0.290678	0.0223173
PRDX6	0.750692	0.0207883	0.999984	0.122043	0.0204137
GSTP1	0.698896	0.00423056	0.999996	0.3281	0.00403852
PPP1CB	0.75829	0.0250015	0.999987	0.24637	0.0244254
RAN	0.783902	0.0497218	0.999982	0.133189	0.0490996
SRSF3	0.76124	0.0274749	0.999961	0.103864	0.0268209
ANXA2	1.32544	0.023134	1.00001	0.00836564	0.0237417
FUS	0.769377	0.0341399	0.999976	0.0811636	0.0334121
PPIB	0.76551	0.0308418	0.999984	0.0155714	0.0305209
TUBA1C	0.750928	0.0225925	0.999997	0.663013	0.0221661
PDIA6	0.671567	0.00133454	0.999974	0.0108876	0.0012426
SRP9	0.771374	0.0358573	0.999972	0.0218181	0.0351543
HLA-A	0.756971	0.0249937	0.999994	0.0229703	0.0245538
PTGES3	0.738736	0.0147137	0.999977	0.156796	0.0143051
HSPD1	0.683957	0.0022576	0.999981	0.0671367	0.00212152
RBMX	0.734597	0.0129063	0.999974	0.197954	0.0124131
APEX1	0.740119	0.0150068	0.999988	0.265255	0.0145443
TSPAN3	0.752935	0.0221329	0.99998	0.0232198	0.0216743
SRP14	0.748471	0.0192806	1	0.961311	0.0188015
EIF3M	0.782117	0.0476323	0.999979	0.097941	0.0468303
TM9SF2	1.28022	0.0454048	1.00002	0.235561	0.0447374
WDR1	0.783201	0.0478567	0.999985	0.273779	0.0474357
MORF4L2	0.772608	0.0370128	0.999945	0.024979	0.036398
ENSA	0.618205	0.000117817	0.999971	0.200359	0.000101263
QSOX1	1.38189	0.00889136	1	0.653688	0.00853724
TRA2B	0.744501	0.0173199	0.999924	0.0312793	0.0168645
PRELID1	0.709068	0.00551196	0.999976	0.032492	0.00520612
CDK16	0.766008	0.0315204	1	0.557836	0.0311592
DNAJA1	0.733379	0.0123016	0.999946	0.00210676	0.0120103
SPTAN1	1.29986	0.0341046	1.00002	0.0992174	0.0333481
CLTA	0.719173	0.00795913	0.999957	0.0138396	0.00767097
LMNA	1.33949	0.0186005	1.00001	0.13712	0.0182713
TSC22D1	1.47077	0.00203987	1.00002	0.0123562	0.00191573
PNRC1	0.743345	0.0164398	0.999979	0.0781573	0.0159831
MORF4L1	0.774533	0.0405772	0.999986	0.523781	0.0396696
LAMC1	0.75644	0.0249534	0.999989	0.212982	0.0247001
XBP1	0.728877	0.0108207	0.999984	0.0440426	0.0104255
EIF2S3	0.748657	0.0191048	0.999977	0.173137	0.0184195
ACTR3	0.752661	0.0218909	0.999982	0.261212	0.0214649
GPS1	0.735514	0.0131713	0.999959	0.0964073	0.0128625
EIF3L	1.29747	0.0352343	1.00001	0.200857	0.0349967
ATRAID	0.769349	0.034015	0.999963	0.0363999	0.0333784
PLXNB2	1.31519	0.0266568	1.00002	0.00601954	0.0262389
STAT1	0.713607	0.00669576	0.999977	0.00792443	0.0064455
ARPC4	1.28168	0.0455894	1.00002	0.562079	0.0451878
TRMT112	0.740954	0.0162161	0.999964	0.0257979	0.0157314
ERBB2	1.58895	0.000204872	1	0.316644	0.000180208
TRAF7	1.28431	0.0430311	1.00002	0.205944	0.0424082
CDK4	0.78321	0.0477891	0.999959	0.012016	0.046961
PPM1G	0.719817	0.00805894	0.999932	0.03061	0.00783166
PDIA4	0.710822	0.00589731	0.99998	0.0393118	0.00567374
ARF5	0.717127	0.00728991	0.999987	0.481052	0.00702817
NDUFB4	0.740694	0.0155914	0.999966	0.0506952	0.0151373
C6orf62	0.719075	0.00808763	0.999953	0.0609417	0.00786104
GLO1	0.753929	0.0226976	0.999965	0.0362688	0.0220953
RBM38	0.779004	0.0439245	0.999991	0.387788	0.0436665
SHISA5	0.751663	0.0209756	0.999972	0.0669212	0.0208045
SUPT5H	1.34431	0.0168719	1.00002	0.0157957	0.0163783
AHNAK	1.38395	0.00868926	1.00001	0.0517522	0.008402
PKN1	1.32788	0.0221713	1.00001	0.220954	0.02157
HSPE1	0.754496	0.0228356	0.999963	0.0178296	0.0223267
EIF5B	0.764657	0.0307343	0.999976	0.143297	0.0302401
ATP6V1F	0.771441	0.037125	0.999973	0.209711	0.0364388
TXNIP	1.36239	0.0128811	1.00001	0.0147487	0.0124854
SUMO1	0.773709	0.038007	0.99995	0.114157	0.0372799
SRP72	0.780255	0.0451527	0.999957	0.243705	0.044875
HSPG2	1.37505	0.0100956	1.00001	0.0748555	0.00973653
FLOT1	0.722101	0.00858981	0.999969	0.0199595	0.0082717
TM9SF3	1.34558	0.0164112	1.00003	0.37226	0.0159249
PAIP1	0.752965	0.0220786	0.999924	0.0447661	0.02172
B4GALT5	1.31654	0.0264539	1.00004	0.0178188	0.0257853
PSME1	0.772352	0.036519	0.999983	0.144728	0.0360677
DEK	0.692336	0.00313741	0.999968	0.041186	0.0029541
GNAI3	0.770639	0.0356133	0.999871	0.00879915	0.0351736
EIF1AX	0.73475	0.0126997	0.999939	0.0161703	0.0122794
TEX261	1.40437	0.00603972	1.00012	0.000929996	0.00578398
TMEM127	1.36245	0.0128733	1.00009	0.00796826	0.01238
CBX3	0.719244	0.0083783	0.999955	0.0294235	0.0081109
GNG5	0.769955	0.0343408	0.999945	0.0106985	0.0337872
SPCS2	0.670361	0.00133715	0.999962	0.142361	0.00124545
TGOLN2	1.32961	0.0217385	1.00003	0.0460391	0.0211769
PSMB5	0.777965	0.0429162	0.999993	0.77193	0.0421114
UBE2R2	0.768381	0.0329967	0.999917	0.0409573	0.0325699
PBX2	0.728319	0.010746	0.999963	0.0433124	0.0104173
PFKL	1.30504	0.0312321	1.00001	0.268177	0.0305414
SYNCRIP	0.729708	0.0112872	0.999934	0.00372603	0.0109385
NHP2	0.770557	0.0348594	0.999981	0.334866	0.0338297
POLD2	0.721995	0.00841285	0.99995	0.0523295	0.00806995
VAPA	0.766117	0.0317194	0.999934	0.0690607	0.0312709
PABPN1	0.73204	0.0119398	0.999945	0.00982238	0.0115512
SELT	0.737589	0.0150381	0.999946	0.0507353	0.0147068
ADRM1	0.76877	0.0352135	0.999983	0.546856	0.0346852
RNF5	0.756738	0.0242519	0.999967	0.0974184	0.0237119
HSBP1	0.764549	0.030152	0.999939	0.038273	0.0292906
DAP	0.772519	0.0372505	0.999961	0.044203	0.0368944
OCIAD1	0.775064	0.0389734	0.999959	0.191833	0.0386412
PAICS	0.689694	0.00268451	0.999964	0.121306	0.00255834
CACYBP	0.63549	0.000314485	0.999902	0.0203835	0.000283731
HLA-B	0.737957	0.0144546	0.999997	0.0690755	0.0142529
EIF2AK2	0.779636	0.0448949	0.999963	0.0981384	0.0443329
NDUFS5	0.682442	0.00212609	0.999995	0.674121	0.00200376
WNK1	1.39252	0.00753113	1.00002	0.011056	0.00723555
C1QBP	0.737221	0.0140975	0.999975	0.279626	0.0136588
TOMM6	0.729722	0.0110633	0.999959	0.0398511	0.010711
SDC4	1.33137	0.0207603	1.00001	0.262867	0.0203595
PAFAH1B2	0.756644	0.0244283	0.999957	0.201563	0.0239413
COX7A2	0.781309	0.0462075	0.999978	0.105389	0.0454231
VGLL4	1.28764	0.0439897	1.00004	0.0880173	0.0438104
UBL5	0.724477	0.00948473	0.999969	0.0352212	0.00906548
STMN1	0.761349	0.0280914	0.999985	0.0891004	0.0276031
ARHGEF2	0.77732	0.0413478	0.999967	0.193869	0.0405761
PSMA4	0.69866	0.00413446	0.999912	0.0105249	0.00391146
DNAJB6	0.777481	0.0423914	0.999938	0.087498	0.0416034
NME1	0.699066	0.00393622	0.999977	0.169777	0.00370486
METTL9	0.739679	0.0150426	0.999958	0.263614	0.0147913
SIGMAR1	0.735361	0.0132622	0.999932	0.00492233	0.0129501
ATP5J	0.785435	0.0506109	0.99998	0.320542	0.0497935
RAB5C	1.29996	0.0347237	1.00005	0.0910816	0.0342994
NDUFV2	0.744031	0.0175758	0.999902	0.00550476	0.0172508
SEC22B	0.745287	0.0195336	0.999842	0.00899522	0.0190479
RANBP1	0.782175	0.0481515	0.999942	0.0593331	0.0473104
WASF2	1.49139	0.00132688	1.00004	0.0005163	0.00123576
URI1	1.31044	0.0289458	1.00002	0.00614653	0.0286294
JUNB	1.38536	0.00895207	1.00001	0.054097	0.00868251
PYGB	1.31569	0.0265565	1.00009	0.000585259	0.0260388
APMAP	1.40369	0.00603266	1.00006	0.0413075	0.00577857
NFYC	0.697669	0.00418429	0.999932	0.0843145	0.00402021
PUM2	0.75456	0.022864	0.999927	0.0429688	0.0223232
MAP4	1.33575	0.0198918	1.00002	0.115579	0.0193727
TSC22D4	1.37431	0.0105086	1.00005	0.107	0.0102554
TRIM27	0.70768	0.00535268	0.999897	0.00366714	0.00510879
LAMTOR5	0.695039	0.00356589	0.999929	0.0102408	0.00336353
MBOAT7	1.29947	0.0340356	1.00003	0.136465	0.0333137
LMO4	0.708425	0.00551142	0.99994	0.00406315	0.00528545
MCM3	0.719409	0.00776176	0.999931	0.00446208	0.00746614
IFI6	0.724915	0.00931976	0.999999	0.248632	0.00900536
NR2F6	0.779291	0.0461965	0.999994	0.397927	0.0458462
PAK4	1.2881	0.0402545	1.00002	0.0473519	0.0394933
CDK2AP2	0.74873	0.0200994	0.999974	0.165641	0.0197017
MEA1	0.695021	0.00336732	0.999931	0.0326973	0.0031898
PSMA5	0.691507	0.00317399	0.999904	0.0204137	0.00297603
VEGFB	0.766402	0.0318101	0.999946	0.113701	0.0316588
MRPL9	0.765248	0.0307959	0.999907	0.128599	0.0300685
MZT2B	0.783176	0.0484246	0.99997	0.264926	0.0474933
CNPY2	0.696694	0.00397503	0.999939	0.0764465	0.00379969
MAGED2	0.703933	0.0049479	0.999985	0.163437	0.00475569
TPGS2	0.767764	0.032723	0.999956	0.0351348	0.0322298
SUPT4H1	0.779538	0.044073	0.999931	0.088122	0.0433506
NGRN	0.780745	0.045112	0.999923	0.00432778	0.0447762
SNRPC	0.740195	0.0154062	0.999937	0.0387303	0.0149405
FLNB	1.32292	0.0236167	1.00003	0.0240144	0.0231279
NDUFS3	0.71964	0.00812221	0.999967	0.413163	0.0077253
EMC4	0.757466	0.0247185	0.99991	0.0390516	0.0243305
SAMD4B	1.32347	0.0231897	1.00001	0.0352757	0.0226294
MRPS15	0.671267	0.00132273	0.999968	0.230164	0.00122433
TXNL1	0.678636	0.00177667	0.999909	0.0960708	0.00166491
MTA2	0.767381	0.0327478	0.999931	0.118258	0.0326555
DDX1	0.777985	0.0421692	0.999896	0.0589437	0.0413373
C8orf33	0.782353	0.0476216	0.999962	0.103026	0.0474615
MSH6	0.771505	0.0365301	0.999978	0.524432	0.03602
AIDA	0.781082	0.0461502	0.999882	0.0101047	0.0455349
DCAF12	0.738309	0.0148223	0.999901	0.0348061	0.0145785
TMEM258	0.745809	0.0188722	0.999945	0.0343681	0.0183391
TAB2	1.32398	0.0233485	1.0001	0.00907539	0.0228855
CIZ1	1.35843	0.0132505	1.00008	0.0086516	0.0127553
FOSL2	1.42048	0.00477309	1.00003	0.0053204	0.00454853
LAMB2	1.35151	0.01509	1.00003	0.024863	0.0146789
MINK1	1.29702	0.035301	1.00006	0.050918	0.0347561
KDM2A	1.38808	0.00815904	1.00002	0.148802	0.00779158
TMBIM1	1.36185	0.0129724	1.00003	0.068402	0.0127119
ZER1	1.45359	0.00261785	1.0001	0.0265597	0.0024455
SCAND1	0.77334	0.0378951	0.99996	0.190101	0.037225
STRN4	1.28608	0.0415583	1.00006	0.00512477	0.0408171
PSMB6	0.784491	0.0507034	0.999959	0.330875	0.0498463
BCL7C	0.749369	0.0197866	0.99995	0.0970197	0.0192553
SSBP1	0.673106	0.00151505	0.999894	0.00494685	0.00140326
RBBP7	0.762004	0.0280538	0.99999	0.597231	0.0273273
POLR2G	0.72867	0.0109641	0.999933	0.164244	0.0105847
TOMM5	0.667008	0.00113158	0.999883	0.0011012	0.00103934
AP2A1	1.436	0.00347639	1.00009	0.00259148	0.00325931
RNPEPL1	1.40207	0.0066947	1.00006	0.0670959	0.00644903
DAXX	0.75383	0.0223877	0.99988	0.0454269	0.0220019
PSMA3	0.753249	0.0232476	0.999918	0.174054	0.0228325
PJA2	1.31733	0.0263191	1.00009	0.0575947	0.0259161
SLC38A10	0.733475	0.012385	0.999971	0.419676	0.0121151
LSR	1.37317	0.0104531	1.00001	0.141344	0.0101361
CHMP1B	0.743611	0.0169639	0.999941	0.17511	0.0166126
NUP98	1.36006	0.012841	1.00004	0.245298	0.0123761
USP14	0.775322	0.0407388	0.999979	0.410033	0.0405294
SHKBP1	1.27502	0.0505086	1.00003	0.0164535	0.0495019
WTAP	1.44326	0.00303371	1.00011	0.0149217	0.00292416
POLR2H	0.778347	0.0423654	0.999934	0.098927	0.0416921
FBXO21	0.784465	0.0495309	0.999993	0.574221	0.0492425
RALGAPB	1.34954	0.0157112	1.0001	0.00637445	0.0153635
PSME2	0.73868	0.0145638	0.999956	0.0166266	0.0141754
UBE2J1	0.760522	0.0267924	0.999844	0.00258996	0.0261051
CNPPD1	1.43309	0.00379871	1.00012	0.0271544	0.00366537
USF1	0.733842	0.0127437	0.999759	0.0138653	0.012308
ECE1	1.36662	0.0116202	1.00004	0.0360914	0.0112456
SNRPE	0.719896	0.00832373	0.999969	0.365342	0.00800559
MRPL20	0.762539	0.0285443	0.999922	0.0744334	0.0277645
LAP3	0.735492	0.0132034	0.999964	0.120507	0.0129174
BLOC1S1	0.678823	0.00184391	0.999918	0.00901931	0.00170894
ARID1B	1.52522	0.000697114	1.0001	0.0014543	0.000643183
JAK1	1.31231	0.0279309	1.00004	0.191457	0.0272909
ATRN	1.27614	0.0482334	1.00002	0.354092	0.04798
ZNF148	1.27412	0.0502394	1.00014	0.0196444	0.049509
EEF1A1P5	1.30094	0.0336828	1.00001	0.315889	0.0334194
MTX1	0.784892	0.049952	0.99992	0.101315	0.0490692
BLCAP	1.32897	0.0212089	1.00012	0.0118329	0.0206696
IRAK1	1.30977	0.0291	1.00001	0.590992	0.0285839
TMEM14B	0.734881	0.0133364	0.999946	0.0491232	0.0129052
NDUFB10	0.720689	0.00818758	0.999979	0.58754	0.00789221
NOP58	0.684017	0.00226127	0.999905	0.0220383	0.00213863
PSMG2	0.68538	0.00236543	0.999867	0.0294022	0.00222893
SMU1	0.701183	0.00435938	0.999794	0.00827967	0.00418717
DRG1	0.770713	0.0353365	0.999937	0.240107	0.034595
PPIG	0.77201	0.0376078	0.999932	0.0800084	0.0373897
TCTN3	1.3682	0.0114495	1.00013	0.0398935	0.0110895
ZC3H15	0.711364	0.00606308	0.999863	0.0252693	0.00585635
MCUR1	0.700316	0.00415805	0.999843	0.0126239	0.00399028
INTS1	1.38656	0.0084019	1.00004	0.0311718	0.00806522
LRP1	1.29002	0.0394449	1.00002	0.00288866	0.0387956
PURB	0.765654	0.0311697	0.999896	0.0504861	0.0305966
MAN1A2	0.777906	0.0449801	0.999913	0.14214	0.044459
NUMB	1.39497	0.00734547	1.00014	0.0320579	0.00705762
ANAPC13	0.770501	0.0359709	0.99989	0.0423865	0.035493
MDK	0.774472	0.0387487	0.999998	0.346873	0.0382661
ANXA4	1.34641	0.0161516	1.00002	0.314085	0.0157849
CHMP5	0.754113	0.0224785	0.999939	0.188169	0.0220831
GSTK1	0.757252	0.024463	0.999976	0.124291	0.0238821
NCOR2	1.33878	0.0181021	1.00001	0.0742449	0.0174612
UBP1	0.777273	0.0423525	0.999956	0.304331	0.0419259
HBP1	1.38894	0.00866393	1.00013	0.0257981	0.00842658
TMEM106C	0.777632	0.0421194	0.99994	0.0331533	0.0414051
SPEN	1.40196	0.00654437	1.00005	0.0402485	0.00628537
MRPS24	0.77528	0.0397067	0.999922	0.116374	0.0390386
TBC1D20	1.43042	0.00400118	1.00013	0.0515064	0.00383947
AMZ2	0.720459	0.00795506	0.999889	0.0745263	0.00762949
ANAPC11	0.764967	0.0302603	0.999948	0.0895939	0.0297425
PXN	1.29606	0.0359638	1.00005	0.00925386	0.0350909
PPFIA1	1.28591	0.0417697	1.0001	0.0143881	0.0320693
PHIP	0.699069	0.00413494	0.999924	0.074953	0.00395607
PPP4R2	0.773842	0.0384786	0.999885	0.0555506	0.0379331
NRSN2	0.753398	0.0221834	0.999938	0.134496	0.0216117
PRPF31	1.3481	0.0156746	1.00003	0.630041	0.0152699
DNAJC5	1.31896	0.0250673	1.00008	0.0255012	0.0243258
ZDHHC20	1.27757	0.0477848	1.00004	0.367188	0.0470857
TESK1	0.712791	0.00628779	0.999859	0.00977463	0.00615749
KIF22	0.769672	0.0352508	0.999943	0.323792	0.0349168
CUX1	1.34909	0.0155496	1.00008	0.00196621	0.0150434
RBX1	0.681269	0.00210577	0.999965	0.547087	0.00197062
NAA38	0.752036	0.0213072	0.999945	0.0458896	0.0208206
PRKRA	0.730115	0.0110727	0.999858	0.0550888	0.0107475
SPIDR	1.44262	0.00348642	1.00011	0.10244	0.00333557
UXS1	0.713002	0.00639114	0.999802	0.0257479	0.00617442
LPCAT3	1.37371	0.0103392	1.00009	0.00353918	0.0101056
TFAM	0.769522	0.0348615	0.99982	0.0327281	0.0343816
MRPS34	0.724064	0.00927317	0.999935	0.178566	0.00900272
TRAPPC5	0.703473	0.00476452	0.999988	0.704777	0.00453871
MRPL30	0.76565	0.0308667	0.999937	0.503991	0.0303336
GNL2	0.731168	0.0118434	0.999994	0.834591	0.0115065
SNRPD1	0.672595	0.00142537	0.999839	0.00173207	0.00133669
PLSCR1	0.696065	0.0035625	0.999983	0.356296	0.0033928
SCAF11	0.769554	0.0351528	0.999997	0.914573	0.0344769
SIKE1	0.736432	0.0138235	0.999859	0.0763501	0.0134261
SIRT2	1.34308	0.0172462	1.00008	0.00189546	0.0168531
AGFG1	1.34541	0.0166427	1.00018	0.0036015	0.0164493
NOTCH2	1.35432	0.0142542	1.00001	0.196587	0.0139432
EDC3	1.33321	0.0202098	1.00008	0.306278	0.0200163
NADK	1.28072	0.0468894	1.00001	0.879886	0.0464918
GBF1	1.37077	0.0106126	1.00006	0.105938	0.0102678
TNFAIP1	1.44775	0.00285725	1.0001	0.00864493	0.00271181
NFX1	0.75699	0.02434	0.999839	0.0579025	0.0239983
ALYREF	0.716953	0.00720017	0.999894	0.0240565	0.00691584
CLUH	1.29692	0.0351004	1.00004	0.0378915	0.0344585
TXNL4A	0.77987	0.044104	0.999914	0.114371	0.043956
GLRX5	0.772673	0.0392528	0.999843	0.000453606	0.03925
TP53BP1	1.33095	0.0209732	1.00007	0.0836497	0.0205776
TGIF1	0.742056	0.0160193	0.999899	0.0251278	0.0157169
PTPMT1	0.772514	0.0380938	0.999886	0.0940912	0.0375888
SBNO2	1.3137	0.0280378	1.00004	0.109698	0.0274766
MEF2D	1.40027	0.00668536	1.00008	0.12458	0.00640973
MRPL2	0.690513	0.00292976	0.999901	0.0769759	0.00276572
ZBTB4	1.37099	0.0108915	1.00008	0.00157089	0.0105856
KDM5B	1.27594	0.0484824	1.00002	0.481671	0.0479334
WDR77	0.752448	0.0220914	0.999931	0.0511688	0.0215471
NBR1	1.31663	0.0266803	1.00008	0.046518	0.0261075
MRPS6	0.735329	0.0130966	0.999905	0.0591082	0.012768
DPY30	0.753961	0.0229337	0.999941	0.141976	0.0223131
COA3	0.746102	0.0180021	0.999936	0.141958	0.0175026
POLR2D	0.730142	0.0110751	0.999841	0.0877444	0.0107035
MRPL14	0.66802	0.00118147	0.999863	0.0152769	0.00108292
ZDHHC9	1.3339	0.0205821	1.00003	0.510366	0.0203697
RIN2	1.42618	0.00447526	1.00015	0.00213737	0.00428118
RNF216	1.32017	0.0247635	1.00009	0.106459	0.0244081
ORMDL1	0.666451	0.00115467	0.999747	0.013488	0.00107614
MRPS26	0.782238	0.047239	0.999966	0.442459	0.0463539
IFT57	0.768078	0.0327164	0.999944	0.200864	0.0317315
ATP5I	0.770969	0.0355082	0.999954	0.0492381	0.0348228
UBA3	0.764578	0.0302887	0.999925	0.382286	0.0296603
ZBTB44	0.761003	0.0280465	0.999943	0.16686	0.0277257
CHRAC1	0.754836	0.0231297	0.999935	0.0701476	0.022617
RANBP9	0.769274	0.0340002	0.999882	0.0800609	0.0336356
SSR4	0.693204	0.0031875	0.999983	0.0922838	0.00302021
IAH1	0.763156	0.028614	0.999865	0.0290149	0.0280038
TXLNA	1.37115	0.010757	1.00003	0.409083	0.0104539
ZCCHC17	0.654029	0.000683642	0.999792	0.0331158	0.00062333
DVL1	1.29426	0.03806	1.00001	0.723574	0.0373987
PDZD11	0.781604	0.0458069	0.999898	0.0976034	0.0451724
HTT	1.28402	0.0441231	1.00004	0.255455	0.0431779
SNRPG	0.769707	0.0354624	0.99996	0.314233	0.0347183
COMMD4	0.774335	0.039327	0.99987	0.0263173	0.0386535
PPP6R1	1.29789	0.0345612	1.00005	0.121685	0.0338392
MRPL34	0.763172	0.0290072	0.999973	0.420455	0.0282495
RNMT	0.766338	0.0319314	0.999951	0.464413	0.0316587
CWC15	0.703607	0.00459845	0.99988	0.0185431	0.00441371
DERL2	0.757945	0.0254098	0.999778	0.0299332	0.0248283
CIR1	0.685341	0.00230769	0.999878	0.151564	0.00219622
MFSD12	1.2736	0.0503505	1.00007	0.109472	0.0494604
ALG8	0.695177	0.0034947	0.999974	0.275694	0.00332538
LSM2	0.711339	0.00597985	0.99995	0.220624	0.00571673
POLDIP3	1.42085	0.00470039	1.00016	0.00600221	0.00450581
CKAP4	0.768231	0.0340928	0.999981	0.367178	0.0339121
APEX2	0.736096	0.0135145	0.999825	0.0432327	0.0130705
CRCP	1.45595	0.00250294	1.00035	0.00260824	0.00235923
SCNM1	0.700077	0.00431876	0.999887	0.127428	0.0041064
DYNC1LI1	0.74565	0.017574	0.999792	0.0817973	0.0170835
MANF	0.746882	0.0182374	0.999843	0.0018186	0.0177196
MRPL55	0.742152	0.0158902	0.999862	0.0555016	0.0154123
ACSS2	1.28332	0.0439295	1.0001	0.078153	0.0431087
UBAP2	0.754814	0.0233518	0.999908	0.137573	0.0231294
NDRG3	1.38898	0.00787528	1.00013	0.019159	0.00766899
BCAS2	0.776706	0.04249	0.999679	0.00530339	0.0418069
ABT1	0.659385	0.000803118	0.999855	0.0884961	0.000735199
AAR2	1.30024	0.0338869	1.00016	0.0261996	0.0331689
BCAR1	1.30444	0.0319383	1.00006	0.16046	0.0311361
POLR1A	1.4025	0.00642563	1.00008	0.0552895	0.0061672
SIPA1L3	1.34611	0.0163215	1.00004	0.0208689	0.0157807
TBC1D5	1.33821	0.0197387	1.00005	0.316149	0.0193843
GPATCH8	1.35129	0.0154539	1.0001	0.0943782	0.0150301
OCIAD2	0.780596	0.0447548	0.999943	0.199427	0.0442058
PTPN1	1.28893	0.0401301	1.0001	0.124939	0.0392414
EXOSC4	0.734335	0.0124621	0.999906	0.0385431	0.0120905
DUS1L	0.758537	0.0255614	0.999966	0.347944	0.0249771
HDAC5	1.30284	0.0331326	1.00012	0.0324501	0.0325621
ASPSCR1	0.762502	0.0286983	0.999999	0.992615	0.0280228
CASP2	0.704276	0.00461857	0.999847	0.00767778	0.00516811
ZNF131	0.765296	0.0307606	0.999845	0.192045	0.0303367
EIF4EBP1	0.774909	0.0394122	1.00001	0.643551	0.0386063
SNRPA1	0.684814	0.00251968	0.999691	0.000138649	0.0023757
SUGT1	1.27597	0.0492535	1.00015	0.0708295	0.0488438
TDP2	0.729782	0.0110135	0.999717	0.0146406	0.0106441
SREBF1	1.3291	0.0214494	1.00006	0.0233022	0.0208415
MUL1	1.47676	0.00184165	1.00027	0.0296736	0.00174104
ZFP36	1.29772	0.0359052	1.00001	0.0588617	0.0352896
CCAR1	0.71827	0.00817986	0.99985	0.0558677	0.00797075
PLXNA1	1.29277	0.0376149	1.00007	0.00115819	0.0366927
PSMD12	0.728939	0.0111212	0.999788	0.00873571	0.0107674
SIK2	1.30385	0.0324421	1.0001	0.0552506	0.0318421
GGCT	0.778756	0.043517	0.999875	0.0681665	0.0430021
MRPL16	0.750759	0.0219238	0.999857	0.153161	0.0215165
UCHL5	0.76212	0.0284177	0.999729	0.0868666	0.027871
YES1	0.774905	0.0398509	0.999989	0.620984	0.0393638
IGF2R	1.3146	0.0266992	1.00007	0.00605716	0.0261827
PFDN6	0.697377	0.0036561	0.999819	0.00563357	0.00347688
COA4	0.740662	0.015354	0.999952	0.171539	0.0149075
RHNO1	0.734442	0.0131428	0.999992	0.899262	0.0128948
TP53BP2	1.28051	0.0460647	1.00007	0.179431	0.0454767
SH3KBP1	0.732705	0.0123007	0.999901	0.0275685	0.0120601
MPC2	0.774238	0.039253	0.999867	0.083408	0.038719
TMEM223	0.765336	0.0304916	0.999824	0.0425744	0.0300183
ADCK2	0.7646	0.0306645	0.999859	0.0855027	0.0301524
STX18	0.756884	0.0247952	0.999914	0.0419301	0.0245637
SSH3	1.45349	0.00276135	1.00006	0.123598	0.00259667
ACADM	0.755968	0.023692	0.999964	0.598876	0.0230911
MRPL17	0.706085	0.00559678	0.999847	0.0501354	0.00539012
HBS1L	1.27445	0.0496181	1.00012	0.157696	0.0490802
TRABD	1.36087	0.0132953	1.00009	0.0900056	0.0130088
HGH1	0.765665	0.0318011	0.999985	0.736397	0.0314573
DENND1A	1.39693	0.00701899	1.00013	0.062432	0.00674547
COA5	0.755004	0.0230536	0.999768	0.0475134	0.022459
RBMXL1	0.769099	0.0340476	0.999838	0.0556382	0.0336035
ANO6	1.30479	0.0315986	1.00012	0.0151256	0.0311241
MAGEF1	0.729844	0.0111084	0.999885	0.0112524	0.0108052
FAM8A1	0.750877	0.0205487	0.999846	0.0277731	0.019928
PPAN	0.767084	0.032156	0.999924	0.331691	0.031538
MRS2	0.634073	0.000263027	0.999754	0.00435392	0.000232671
PLEKHA3	0.771183	0.0352815	0.999759	0.0750034	0.0350126
UBR2	0.765718	0.0313105	0.999886	0.245228	0.0308435
SLC12A9	1.43538	0.0035453	1.00016	0.00799732	0.00336982
SEC61G	0.77726	0.0421404	0.999923	0.181093	0.0410379
PEX5	1.31456	0.0270084	1.00016	0.010329	0.0266999
PIM3	1.32288	0.0243931	1.00007	0.0899621	0.0240234
MRPS11	0.719371	0.00788628	0.999713	0.00465743	0.00758291
PHKG2	0.756627	0.0243223	0.999821	0.061489	0.0238261
SRPK1	0.714661	0.00705134	0.999906	0.072993	0.0067555
RAB12	0.690702	0.00283992	0.999815	0.00508665	0.00267642
RBM34	0.773994	0.0382521	0.999673	0.00769209	0.0374849
SLC30A7	0.769366	0.0350231	0.999745	0.0273598	0.0344385
LYRM2	0.678342	0.00181439	0.9997	0.000778501	0.00169299
TIMM44	0.780462	0.045825	1.00002	0.741898	0.045062
CELSR1	1.33212	0.0205448	1.00003	0.0392445	0.0201103
TXNDC17	0.731626	0.0119636	0.999857	0.0479389	0.0115766
PGRMC1	0.672726	0.00143337	0.999955	0.047232	0.00132451
SOCS5	1.29517	0.0363112	1.00026	0.0176442	0.0355092
ZBTB7A	1.33418	0.0196512	1.00008	0.124966	0.0191514
CITED2	1.30725	0.030498	1.00006	0.00188703	0.029987
PMVK	0.720905	0.00820969	0.999863	0.0415596	0.00790851
ZNF561	0.691567	0.00295703	0.999885	0.114987	0.00280781
MRPL48	0.761946	0.028602	0.999985	0.811614	0.0279845
TAF11	0.753077	0.0219342	0.999796	0.0763833	0.0214669
PKD1	1.27528	0.0493947	1.00006	0.0300349	0.0485468
SREBF2	1.29901	0.03478	1.00003	0.0880464	0.0342581
RPRD1B	1.28001	0.0464916	1.00014	0.0276536	0.0458463
NDUFB1	0.758617	0.0264782	0.999849	0.00717535	0.0258183
C18orf32	0.726421	0.00972361	0.999886	0.0725831	0.00940498
TTC7A	1.34145	0.0175519	1.00023	0.000125711	0.0170098
APPL2	1.38948	0.00792096	1.00011	0.114417	0.00763871
TIMM8B	0.70672	0.00506044	0.999912	0.0206823	0.00484301
NDUFB6	0.707576	0.00516833	0.999868	0.0441502	0.00495598
GTF2H4	0.782608	0.0487007	0.999747	0.0387129	0.0482533
DOCK9	1.30879	0.0304931	1.00005	0.291071	0.0297895
PPIL1	0.674865	0.00163898	0.999871	0.0736051	0.00152223
ATG2A	1.31093	0.0282823	1.00009	0.121284	0.0277552
NCKAP5L	1.29693	0.0355947	1.00009	0.0979669	0.0349771
FAM104A	0.781727	0.046704	0.999849	0.189261	0.046076
SYAP1	0.701068	0.00430396	0.999927	0.215472	0.00408895
AGAP1	1.37683	0.0103789	1.00014	0.0033058	0.0100693
PRR12	1.28508	0.0422485	1.00007	0.0200153	0.0415252
GRWD1	1.27433	0.0496263	1.00021	0.0343196	0.0490559
RPS6KA1	1.2945	0.0372904	1.00012	0.0558535	0.0368443
KLHL36	1.41402	0.00572208	1.00019	0.041413	0.00544888
MED20	0.652949	0.00058605	0.999778	0.0487015	0.000531297
MRPL32	0.737259	0.0139827	0.999785	0.0164006	0.0135543
DTX2	1.3055	0.0310536	1.00017	0.0895044	0.0304643
SCRN1	1.31274	0.0280004	1.00005	0.0422872	0.0273084
NCS1	1.28014	0.0458445	1.00009	0.00656473	0.0448768
ASB8	0.76758	0.0331372	0.999742	0.142729	0.0328244
SRGAP3	1.32637	0.0235107	1.00003	0.366645	0.0230727
PSPC1	1.33012	0.0209736	1.00012	0.271264	0.020404
DCUN1D5	0.694774	0.00349875	0.999749	0.0231537	0.00334024
TPMT	0.734163	0.012666	0.999756	0.00530424	0.0124155
PIAS2	0.785151	0.0504404	0.99987	0.160324	0.0499643
TMEM254	0.719769	0.00798855	0.999821	0.046316	0.00774028
HMGB3	0.696594	0.00394784	0.999863	0.00282102	0.00375432
AHDC1	1.32322	0.023786	1.00005	0.00634888	0.0234228
GIT2	1.31958	0.0251036	1.00014	0.144876	0.0244622
ACOT13	0.730929	0.0113557	0.99967	0.00135605	0.0110127
TMCO1	0.724912	0.00958777	0.999952	0.236908	0.00923979
TMEM9B	1.3176	0.0258209	1.00009	0.291464	0.0252892
PSMG1	0.779696	0.0456287	0.999781	0.0162996	0.0450324
CERK	1.34462	0.0166665	1.00011	0.0110951	0.0163457
DHFR	0.75512	0.0235111	0.999918	0.120899	0.0232155
NDST1	1.45059	0.00266212	1.00005	0.0110042	0.00250432
ZNF32	0.777296	0.0414024	0.999892	0.1558	0.0407037
SMAD2	0.780821	0.0453329	0.999948	0.281644	0.0450967
SMUG1	0.632509	0.000262883	0.999713	0.0127985	0.000233227
ZNF451	0.704214	0.00486878	0.999812	0.156907	0.00461872
TPRKB	0.703135	0.00463506	0.999773	0.0539543	0.00437176
GLUD1	1.29215	0.038331	1.00007	0.00924843	0.0378494
RPL22L1	0.762077	0.0280062	0.999986	0.773206	0.0272454
ANKS6	1.32875	0.0215509	1.0002	0.0122807	0.0211368
CTPS2	0.748623	0.0193647	0.99972	0.00520237	0.018995
CKS2	0.759681	0.026639	0.999986	0.592164	0.0259629
PIGS	1.47906	0.0015754	1.00008	0.00813384	0.00144909
RARA	1.28606	0.0423625	1.00009	0.0532955	0.0415287
FADD	1.31738	0.0258442	1.00025	0.0347001	0.0252439
SNX14	0.756279	0.024221	0.999813	0.0423072	0.023794
ACACA	1.3542	0.0142582	1.00007	0.0909927	0.0139576
RRP36	0.752913	0.0223469	0.999786	0.0182331	0.0220506
IER5L	1.32257	0.0245352	1.00003	0.114258	0.0238908
PAK1IP1	0.778441	0.0436378	0.999692	0.0268828	0.0434471
SLC27A3	0.724128	0.00916068	0.999835	0.0125594	0.0088819
SPRYD4	0.755648	0.0249305	0.999854	0.285204	0.0243778
AACS	1.31232	0.0276308	1.00008	0.312371	0.0270021
PTPN2	0.620474	0.00013406	0.999652	0.000944014	0.000117485
MZT2A	0.771138	0.0353301	0.999941	0.271335	0.0344943
CLDN4	1.47086	0.00200864	1.00001	0.0387759	0.00187205
DPP7	1.3093	0.0293877	1.00003	0.0931121	0.0286706
HIF1AN	1.50153	0.00100824	1.0002	0.0107645	0.000919576
PDS5B	1.28952	0.0398486	1.00024	0.0583183	0.0391157
FRMD8	1.31396	0.0275614	1.00002	0.72873	0.0272765
SMIM10L1	0.743489	0.0175157	0.999885	0.209128	0.0170598
ANKRD27	1.30154	0.032723	1.0001	0.0145805	0.0323171
USP47	0.730447	0.0122852	0.999835	0.0788369	0.0120593
TCAIM	0.781386	0.0459989	0.999596	0.0132474	0.0451822
SBF1	1.40768	0.00570591	1.00009	0.0101298	0.00546016
CNNM4	1.42884	0.00414849	1.00016	0.01648	0.00395776
RNF6	1.29812	0.0351459	1.00017	0.156962	0.0347271
FBXO9	0.744728	0.0175544	0.999792	0.0290592	0.0173088
SHQ1	0.774861	0.0392168	0.99967	0.111075	0.0382672
LANCL2	0.737129	0.0138056	0.999863	0.134316	0.013378
WDR24	0.759342	0.0263397	0.999945	0.714882	0.0258536
TBC1D22A	1.54464	0.000473745	1.00041	0.000186208	0.000432906
TMEM126B	0.742527	0.0163164	0.999831	0.0635241	0.0159356
PARP2	0.749771	0.0201451	0.999903	0.40807	0.0196943
CEBPG	0.782113	0.0488242	1.00004	0.431203	0.0479611
RLF	1.39912	0.00657106	1.00004	0.483823	0.00628146
CFAP36	0.782193	0.0474923	0.999907	0.168967	0.0465189
MTA1	0.778303	0.0429734	0.999971	0.251528	0.0426255
HIBCH	0.768719	0.0333244	0.999789	0.0802311	0.0330813
CWC22	0.700304	0.00421076	0.999828	0.250061	0.00405325
TYW1	1.27492	0.0495774	1.00033	0.029712	0.0488841
TIMM10	0.750228	0.0201599	0.999893	0.336399	0.0195442
FOXK1	1.40287	0.00628901	1.00009	0.0256243	0.00601355
PTRH2	0.785364	0.050332	0.999705	0.0277946	0.0494584
GAPVD1	1.27427	0.049892	1.00018	0.0812698	0.0486658
EMP1	1.42723	0.00452216	1.00005	4.11187e-05	0.0043087
XPC	1.39651	0.00778442	1.00018	0.109925	0.00752908
UBTD1	1.41666	0.00491714	1.00007	0.252153	0.00462177
ZSWIM4	1.29516	0.0363914	1.00006	0.0130043	0.0359426
AKAP11	1.34441	0.0165316	1.00026	0.0114484	0.0160288
UQCC3	0.744722	0.0183052	0.999862	0.110178	0.0178901
IPO11	1.30894	0.0297106	1.00019	0.323603	0.0291834
SKP2	0.778656	0.0436648	0.999836	0.0184821	0.0434641
NPC1	1.34904	0.0155487	1.00023	0.00133413	0.0150958
AKAP17A	0.767559	0.0327629	0.999868	0.110554	0.0324949
DHTKD1	0.750702	0.0213763	0.99988	0.0478267	0.0210569
UTP14C	1.4007	0.00661417	1.00027	0.00892229	0.00628146
CFI	0.77021	0.034834	0.999958	0.0331207	0.0344167
SMC6	0.739683	0.0148341	0.999667	0.0218378	0.0144547
NMI	0.764381	0.0297466	0.999881	0.074147	0.0292159
MTF2	0.779083	0.0453882	0.999738	0.0768236	0.0451579
DAGLB	1.42042	0.00454562	1.0004	0.0103127	0.00433995
EPB41L1	1.42243	0.00460418	1.00006	0.0232126	0.00554217
CMTM4	1.34262	0.0173572	1.00017	0.000922703	0.0206989
HINT2	0.671225	0.00131076	0.999768	0.00992383	0.00122026
TCEAL8	0.772057	0.0359735	0.999779	0.0062985	0.0353233
ZNF865	1.30823	0.0296092	1.00013	0.0646775	0.0290665
ZHX2	0.771166	0.0358651	0.999985	0.540944	0.0353849
BAHD1	1.3237	0.0237658	1.00016	0.0481618	0.023108
NUCB2	0.700074	0.00446329	0.999807	0.000260509	0.00427404
MRPL13	0.784395	0.0494849	0.999959	0.453335	0.0491119
RAI1	1.35439	0.014493	1.00008	0.0146275	0.0141008
OCRL	1.39229	0.00752828	1.00011	0.189494	0.00730316
EXOSC3	0.775891	0.0402775	0.99944	0.00232052	0.0396082
GSKIP	0.779221	0.0440967	0.999652	0.00541512	0.0438605
PET100	0.692652	0.00310841	0.999957	0.404066	0.00291188
FAM120B	1.60154	0.000146233	1.00031	0.00142897	0.000128002
ARHGAP35	1.29765	0.0348757	1.00007	0.00923517	0.0343398
CCNB1	0.753851	0.0235552	0.999966	0.393078	0.0230536
PHGDH	0.771803	0.0364849	0.999982	0.203371	0.0358525
FAM200B	0.712015	0.00605034	0.99976	0.00891627	0.00578255
NIN	1.32678	0.0223921	1.00031	0.0408598	0.0217218
GDAP2	0.758641	0.0264967	0.999648	0.0912732	0.02599
NARS2	0.665428	0.00113222	0.999936	0.271648	0.00105023
HERC1	1.34342	0.0169686	1.0002	0.0418633	0.0164638
MYO18A	1.44853	0.0028397	1.00006	0.00919434	0.00269115
SLC25A10	0.709111	0.0056537	0.999916	0.119751	0.00548225
EPB41L2	1.38041	0.00910439	1.00004	0.0192824	0.00885378
MED19	0.718332	0.00783118	0.999705	0.0949761	0.00749947
ANKRD13A	1.42838	0.00405196	1.00011	0.026299	0.00384139
ALDH5A1	0.745008	0.0176295	0.999862	0.021744	0.0172015
LPAR2	0.747214	0.0188289	0.999786	0.0212154	0.0182887
AMBRA1	1.34776	0.0159133	1.00004	0.183818	0.0155185
DCUN1D4	0.726787	0.00988745	0.999813	0.173573	0.00957446
APTX	0.782779	0.0482853	0.999645	0.110246	0.0479415
FBXL20	1.39057	0.00799366	1.00025	0.016153	0.00769457
ITPKC	1.3535	0.0146078	1.00011	0.0152952	0.0141291
ZNF316	1.31451	0.0270529	1.00007	0.0168368	0.0263303
XPO4	1.29652	0.0365718	1.00028	0.038395	0.0227938
ARL6IP6	0.738512	0.0143766	0.999803	0.0363129	0.0139406
PIP5K1C	1.33061	0.0206733	1.00012	0.0395569	0.0199757
TBC1D13	1.41639	0.00492259	1.00013	0.113612	0.00466541
RDH14	0.711615	0.00607716	0.999203	0.00178483	0.00591767
GNPTAB	1.34696	0.016013	1.00012	0.0942172	0.0154627
TCAF1	0.764991	0.0302717	0.999948	0.327354	0.0296879
ANAPC15	0.731462	0.011592	0.999934	0.443284	0.0112616
TAF9B	0.744199	0.0168826	0.999921	0.244835	0.0163947
WDR73	0.740648	0.015444	0.999831	0.168243	0.0149328
IFI30	0.710041	0.00603569	0.999981	0.094731	0.00584459
MTERF4	1.4151	0.00563441	1.0002	0.172474	0.00545834
INTS12	0.769242	0.0339632	0.999701	0.270422	0.0334309
ANKZF1	1.35433	0.015255	1.00007	0.287811	0.0150987
AP1S2	0.564899	5.72441e-06	0.999829	0.00492907	4.41544e-06
TMEM68	0.733844	0.0123816	0.999869	0.194111	0.0119269
RARS2	0.726496	0.0102187	0.999703	0.00613305	0.0097971
SYNGAP1	1.37532	0.0101791	0.999992	0.821144	0.00981234
PPP1R37	1.35732	0.0136307	1.00008	0.182482	0.0131203
GPT2	0.763378	0.0290768	0.999917	0.0771438	0.0285864
PLD2	1.33137	0.0216355	1.00016	0.108818	0.0213402
DUSP12	0.755914	0.0236391	0.999407	0.0327994	0.0229445
CEP192	0.783432	0.0495992	0.999935	0.64107	0.0491843
MSRB1	0.726723	0.0107533	0.999883	0.24432	0.0105015
GLIS2	1.34375	0.0174945	1.00006	0.0229248	0.0170351
PGP	0.731574	0.0116937	0.999837	0.0337456	0.0114618
MRPS33	0.774194	0.0382241	0.999896	0.17655	0.0375147
TARBP1	0.784326	0.0497072	0.999916	0.178357	0.0489107
TM2D3	0.738959	0.0146883	0.999741	0.016539	0.0143256
EZH1	1.31049	0.0295559	1.00028	0.0209498	0.0289906
NT5C3A	0.766866	0.0329573	0.999788	0.0368208	0.0325165
CDK19	1.36011	0.0131163	1.00016	0.0878162	0.0127636
THOC1	0.682731	0.00224042	0.999808	0.159778	0.00211595
GALNT10	1.31265	0.0284445	1.00027	8.60225e-06	0.0278826
MRPL46	0.72873	0.0106475	0.999564	0.0221008	0.0102948
WARS2	0.776377	0.0406572	0.999805	0.25486	0.0397927
GRB7	1.45241	0.00268996	1	0.216956	0.00255568
YARS2	0.756844	0.025221	0.999893	0.395995	0.024641
TEAD1	1.38569	0.00831799	1.00009	0.00179993	0.00801553
SAYSD1	0.707954	0.00553255	0.999373	0.000752411	0.00531705
NTHL1	0.76231	0.0289676	0.999947	0.55923	0.0284141
FJX1	0.743591	0.0166005	0.999846	0.0509897	0.0162338
CXCR4	0.749994	0.0206709	0.999957	0.011588	0.0203173
EPHA2	1.32224	0.0243792	1.00004	0.140407	0.0239503
MARVELD1	1.30712	0.03069	1.0001	0.00446331	0.0300431
ARHGAP23	1.3495	0.0153906	1.00005	0.000131463	0.0148018
SLC9A6	0.767425	0.0324713	0.999608	0.0216077	0.0320893
RALGAPA2	1.28675	0.0412057	1.00006	0.199428	0.0406002
NAPG	0.728456	0.0109822	0.999751	0.055334	0.0107456
RNF8	0.775999	0.0403838	0.999625	0.0775742	0.0399335
METTL8	0.711027	0.00588114	0.999605	0.0654829	0.00566101
DENND6A	0.735333	0.0133345	0.999713	0.120641	0.01287
LUZP1	1.29005	0.0393773	1.00025	0.000743221	0.0385031
FOXRED2	0.752329	0.0217662	0.999981	0.645478	0.0213386
CSTF2	0.731013	0.0117017	0.999434	0.0311763	0.0113141
PPL	1.39861	0.00697452	1.00006	0.000514341	0.00666475
PIN4	0.770873	0.0358056	0.999677	0.0233923	0.0353272
SH3PXD2A	1.36045	0.0126592	1.0001	0.000305849	0.012297
VPS13D	1.31641	0.0261776	1.00007	0.0229455	0.0257607
PEAK1	1.28627	0.0416256	1.00011	0.104883	0.0408682
HMBS	0.727183	0.0100124	0.999765	0.05678	0.00967205
GEMIN6	0.746242	0.0185934	0.999603	0.0911004	0.0180753
LRIF1	0.766763	0.0321536	0.999497	0.0132629	0.0316693
PXDN	1.36489	0.0128471	1.00001	0.142893	0.012498
ITSN1	1.27313	0.0503563	1.00012	0.152839	0.0494605
PGAP3	1.34931	0.0163251	1.00002	0.249604	0.0158114
KIZ	1.3272	0.0220596	1.00024	0.0368126	0.0216245
CASP8	0.69888	0.00386254	0.999842	0.034634	0.00370808
DLG5	1.28435	0.0429537	1.00002	0.288699	0.0420816
QSOX2	1.27518	0.0490861	1.00012	0.286637	0.0485415
CASP3	0.750129	0.0203213	0.999701	0.0276253	0.0200731
TSPAN9	1.45625	0.00243552	1.00018	8.31422e-05	0.00227957
BAIAP2L1	1.35868	0.0135646	1.00006	0.113659	0.0132115
LTV1	1.37402	0.0101962	1.00042	0.0229724	0.00992182
FEN1	0.766817	0.0327265	0.999778	0.0164783	0.0322431
HYI	0.770166	0.0350922	0.999618	0.00332844	0.0347895
TBC1D7	0.678934	0.00198405	0.999703	0.0116549	0.00185692
ZNF641	0.696859	0.00367017	0.999871	0.322349	0.00348195
SERPINB1	0.783976	0.0486009	0.999959	0.174952	0.0478983
ASB1	1.2825	0.0448461	1.00021	0.121903	0.0441779
PPIP5K1	1.3215	0.0250627	1.00023	0.013513	0.0246732
TRAF3IP2	1.36071	0.0134974	1.00024	0.0104099	0.0133107
NXT2	0.767569	0.0332695	0.999857	0.0736034	0.0327975
SCNN1A	1.57282	0.000281472	1.00001	0.00874512	0.000253562
MGA	1.27956	0.0466465	1.00013	0.0543237	0.0459443
MED1	1.41533	0.00524618	1.0002	0.0181952	0.00501661
NUMBL	1.34437	0.0172006	1.00009	0.00263155	0.0167277
HDAC10	1.28245	0.0443133	1.00013	0.0530071	0.0437879
FOS	1.28979	0.0408053	1	0.167996	0.0403551
ZBTB14	0.747335	0.0188758	0.99894	0.00615631	0.0185288
PRIM2	0.613395	8.60127e-05	0.999475	0.00289689	7.2588e-05
MAGOHB	0.665448	0.00122206	0.999794	0.0890865	0.00112929
CKLF	0.743242	0.0164921	0.99981	0.0493706	0.0161786
HPS1	1.31074	0.0289057	1.00012	0.0192864	0.0285638
UBE2Q2	0.715342	0.00729621	0.999785	0.00450377	0.00706381
RAB33B	0.764577	0.030946	0.999685	0.133633	0.0304046
ST7L	0.781574	0.0462813	0.999264	0.00400609	0.045481
CCDC167	0.749333	0.0195368	0.999848	0.0183161	0.0190636
FXYD5	1.37086	0.0110368	1.00003	0.103289	0.0107507
RAP2B	0.735256	0.0131812	0.999878	0.0308424	0.012984
COG3	1.41305	0.00522899	1.0004	0.00895616	0.00499541
FANCG	0.64959	0.000582413	0.999695	0.0201824	0.000530151
KCTD11	1.68017	3.44124e-05	1.00039	0.000757167	2.87379e-05
SLC25A46	1.34075	0.0179222	1.00003	0.785031	0.0176265
MICU2	1.49862	0.00112387	1.00011	0.144294	0.00103168
MVK	1.27523	0.0488804	1.00044	0.00345143	0.0479178
RPL26L1	0.735462	0.0129671	0.999728	0.0211008	0.0124779
TOM1L2	1.31512	0.0275314	1.00016	0.0412299	0.0269641
RAPGEF6	1.36744	0.0122848	1.00038	0.0941697	0.0119461
ZBTB40	1.2904	0.0393177	1.00019	0.0651723	0.0389066
HEATR5B	1.27812	0.0470504	1.00013	0.326768	0.0465078
GXYLT1	0.750266	0.0210919	0.999878	0.43294	0.0207088
CCDC34	0.706529	0.005494	0.999658	0.00403772	0.00527147
PPIL3	0.59282	2.62222e-05	0.999637	0.0149209	2.12539e-05
TMEM53	0.705495	0.00476881	0.999686	0.0992115	0.00459777
ANKRD39	0.738256	0.0143137	0.99978	0.412537	0.0138436
POLD3	0.745497	0.0177993	0.999821	0.122533	0.0172927
ESCO1	0.779266	0.044745	0.999671	0.0645037	0.0443822
SUFU	1.35874	0.013165	1.0002	0.0139498	0.0128192
RAB24	0.765835	0.0309679	0.999914	0.554132	0.0301767
FOXJ2	1.31493	0.028394	1.00018	0.0172174	0.0278652
TAF13	0.766888	0.0334028	0.999459	0.00453519	0.0331002
DXO	0.776957	0.0413733	0.999724	0.0105942	0.0408163
MBNL3	0.777457	0.0423813	0.999971	0.504051	0.0415087
ECI2	0.762521	0.0293205	0.999796	0.00480278	0.0289613
PLOD2	0.7217	0.00848037	0.999966	0.150562	0.0081926
TMEM141	0.757304	0.0247646	0.999926	0.108885	0.0243591
GCC1	1.3729	0.0106206	1.00021	0.230539	0.0102196
ZNF562	0.779007	0.0438457	0.999903	0.294143	0.0434822
SASH1	1.38557	0.00860414	1.00019	0.00225322	0.00829858
VWA8	1.34023	0.0178481	1.00043	0.00807198	0.0173728
GGT7	1.31915	0.0248648	1.00016	0.00586332	0.0243942
GMNN	0.674261	0.00155492	0.999777	0.0177222	0.00145592
FBXO31	1.31737	0.0260043	1.00027	0.116149	0.0252835
JADE2	1.49012	0.00152154	1.00009	0.0127034	0.00143862
TMC4	1.41103	0.00578123	1.00003	0.0472705	0.00557168
PLGRKT	0.741782	0.015688	0.999619	0.00851139	0.0150209
CASP6	0.736333	0.0136598	0.99984	0.21094	0.013241
EPM2AIP1	0.776111	0.0403022	0.999945	0.298767	0.0397425
C18orf21	0.716857	0.00734208	0.999601	0.0576722	0.00709473
UNC5B	1.28034	0.0452531	1.00002	0.104975	0.0444137
TMEM181	1.55442	0.000382953	1.00014	0.0547641	0.000346065
LNX2	1.28616	0.0425786	1.00035	0.0350688	0.041966
SLC1A4	0.780306	0.0450099	0.999805	0.0247776	0.0444413
NR2C2AP	0.710521	0.00614608	0.999927	0.380236	0.00582327
PIEZO1	1.39585	0.00780098	1.00006	0.0225511	0.00745322
BEND3	0.758915	0.0260112	0.999865	0.324841	0.0254718
MTO1	0.719462	0.00809493	0.999759	0.28255	0.00781716
CMC2	0.773951	0.0384705	0.999614	0.0610903	0.0379924
UTP20	1.34273	0.0173008	1.00023	0.0806615	0.0167804
IFI27	0.717408	0.0073945	0.999995	0.032232	0.00711698
MTMR6	1.33252	0.0203164	1.00022	0.135661	0.0198526
FKBP11	0.781668	0.0477293	0.999762	0.0185801	0.0469556
MAP3K4	1.367	0.0113623	1.00034	0.0214157	0.0110587
RAB11FIP5	1.42006	0.0046109	1.00031	0.000544861	0.00438846
LRRC45	0.762592	0.0289268	0.999732	0.0688899	0.0285182
TRAPPC2	0.69588	0.00345414	0.99973	0.202167	0.00326714
TRIP13	0.766431	0.0324386	0.999912	0.179088	0.0320675
TSPYL4	1.33507	0.0198286	1.00006	0.278191	0.0194868
CYBRD1	1.45818	0.00237844	1.00005	0.00390547	0.00223287
KRT7	1.46118	0.00231913	1.00001	0.00196	0.00219176
EXOC6B	1.32285	0.023655	1.00055	0.00376205	0.0229322
UBE2L6	0.756144	0.0239843	0.99997	0.0514548	0.0235027
TK1	0.741876	0.0168001	0.999982	0.497644	0.0164436
MITD1	0.775831	0.0402635	0.999678	0.233063	0.0398281
PEX3	1.28152	0.044805	1.00061	0.00246139	0.0444899
DAPK1	1.28399	0.0438562	1.00004	0.380776	0.0430593
TCF20	1.31069	0.0285515	1.00009	0.126257	0.0282306
RXRA	1.28843	0.0398987	1.00014	0.00911557	0.0390654
ZBTB42	0.774089	0.0387578	0.999856	0.0354519	0.0385465
DENND2D	0.761595	0.0274778	0.999885	0.150529	0.0268823
IL32	0.780225	0.0450725	0.999995	0.58491	0.04459
SOGA1	1.41993	0.00484213	1.00005	0.00084325	0.00460721
HECTD4	1.42848	0.00404807	1.00005	0.240313	0.00383271
MRPS31	1.24502	0.0757707	1.00009	0.724478	0.0465067
FGFR1	0.781318	0.0459497	0.999997	0.704611	0.0454056
DGKD	1.27608	0.0492104	1.0003	0.0351829	0.0487394
GPATCH2	0.724094	0.00961877	0.999868	0.502094	0.00937972
CA5BP1	0.727502	0.0100233	0.999619	0.0253977	0.00969874
DCLRE1C	0.770076	0.0348243	0.999609	0.0962447	0.0341926
TAP1	0.727275	0.0102161	0.999945	0.000318212	0.00989455
MAL2	0.774074	0.0382093	1	0.774276	0.0376899
CTIF	1.33146	0.0207731	1.00019	0.0382145	0.0202326
NRM	0.770083	0.0347203	0.999882	0.0414021	0.0344592
TAF3	0.767223	0.0329679	0.999821	0.29405	0.0325406
MEX3A	0.778622	0.0434662	0.999973	0.214172	0.0430995
BTRC	1.39571	0.0069456	1.00039	0.0174337	0.00668382
NR1D1	1.29015	0.0396158	1.0002	0.0142816	0.0389498
MAFF	1.30413	0.0340415	1.0001	0.160479	0.0335448
SVIL	1.39349	0.00738572	1.00008	0.0218927	0.00710386
DNPH1	0.72071	0.00814899	0.999914	0.0241333	0.00785009
FANCL	0.739557	0.0149098	0.999754	0.226145	0.0146328
EHD2	1.39413	0.00728135	1.00009	0.000310293	0.00696956
PMS1	0.772897	0.0372363	0.999669	0.074957	0.0368619
COX18	0.706614	0.00496319	0.999824	0.431083	0.00472754
RDH13	1.27809	0.0467745	1.00017	0.11467	0.0461794
PHTF1	0.776857	0.0419214	0.999773	0.296849	0.0410468
NCAPG2	0.783332	0.048135	0.999952	0.637345	0.0472461
TAF1B	0.745492	0.0180716	0.999471	0.0378442	0.017669
RELB	1.31656	0.0264012	1.00018	0.0114369	0.0257574
TMEM234	0.767255	0.0324228	0.999733	0.189293	0.031674
PRPF39	0.734968	0.0133108	0.999655	0.0659234	0.0130397
SPATS2	0.697404	0.00384667	0.999834	0.0892363	0.00367888
USP18	0.729357	0.0108185	0.999913	0.0538144	0.0104323
REPS1	1.43659	0.00342179	1.00025	0.00279287	0.00325033
DONSON	0.71556	0.00733987	0.99978	0.215723	0.00707683
CHIC2	0.769543	0.0340051	0.999753	0.455417	0.0336758
SERPINB9	0.774813	0.0406169	0.999853	0.148563	0.0398559
TMEM67	1.33644	0.0196255	1.00018	0.130808	0.0195268
MPHOSPH6	0.691913	0.00307394	0.999193	0.0265626	0.00289553
SDF2L1	0.700764	0.00415777	0.999707	0.00377909	0.00394361
ENOSF1	0.762715	0.0295453	0.999933	0.250351	0.0290077
ZSCAN29	1.43173	0.00375639	1.00043	0.0272516	0.00355712
FZD3	0.756553	0.0244476	0.99991	0.00835657	0.0240216
HAUS1	0.741763	0.0160484	0.999687	0.108863	0.0157067
FAM98C	1.32208	0.0241251	1.00023	0.0183751	0.0238708
FANCI	0.762581	0.0290217	0.999806	0.0101152	0.028434
ZNF814	0.768668	0.0338436	0.999871	0.219561	0.0334001
MATN2	0.726729	0.00981234	0.999927	0.0228544	0.00963724
EEF1E1	0.764984	0.0312814	0.999697	0.0166901	0.0307901
COL16A1	1.36021	0.0128247	1.00012	0.00207276	0.0124515
TPCN2	1.44248	0.00311606	1.00036	0.093815	0.00295365
AMMECR1	0.743792	0.0172149	0.999822	0.0174571	0.0169103
TUBG2	1.28333	0.043279	1.00038	0.113288	0.042808
ST3GAL1	1.28264	0.045832	1.00001	0.385694	0.0448431
TEP1	1.30366	0.0319456	1.00018	0.129163	0.031427
PUS7L	0.717831	0.00753338	0.999701	0.0697541	0.00714088
CASP8AP2	0.782383	0.0477386	0.999698	0.0852501	0.046879
PPP3CA	1.43873	0.00351838	1.00019	0.00620955	0.00330034
SLC9A1	1.3398	0.0180244	1.00016	0.00555705	0.0175817
CRIP1	1.2989	0.0350047	1	0.482541	0.0346228
ZNF354A	0.742259	0.0163476	0.999584	0.0621912	0.0157546
EIF4E3	0.693189	0.00311899	0.999762	0.00228437	0.0029603
ABHD5	0.765581	0.0313867	0.999427	0.0529802	0.0308396
ZNF426	0.760963	0.0275634	0.999802	0.112887	0.0271597
CBX8	0.764631	0.0300675	0.999822	0.432896	0.0294717
PRR5	1.32831	0.0216255	1.00025	0.0597303	0.0212057
RAB23	0.714148	0.00664971	0.999776	0.175292	0.00644622
RAPGEF3	1.40205	0.00645352	1.00001	0.590092	0.00621333
SPOCK2	1.36891	0.0110276	1	0.634984	0.0107393
OAS2	0.721603	0.00857138	0.999997	0.797837	0.0083974
AMACR	0.748853	0.0204832	0.999439	0.00801764	0.0200992
ZNF101	0.757506	0.0252739	0.999637	0.227831	0.0247978
GMPR	0.603234	5.27299e-05	0.999893	0.000378498	4.45259e-05
ACSM3	0.62783	0.000184687	0.99992	0.219942	0.000164007
CTSS	0.742028	0.0162903	0.999961	0.212635	0.0159255
TMEM107	0.768846	0.0333803	0.999723	0.24234	0.0323255
CHAF1B	0.777477	0.0426548	0.999649	0.022043	0.0421757
LPIN3	1.43151	0.00397137	1.00024	0.00276316	0.00382649
EMC9	0.632791	0.000238337	0.999583	0.0254515	0.000207627
CEP120	1.32051	0.0243036	1.00055	0.0335919	0.0239834
TIPIN	0.77193	0.0369566	0.998893	0.0187904	0.0365457
MED31	0.776545	0.0409137	0.99959	0.163742	0.0401053
PSMG4	0.762091	0.0283862	0.9996	0.0298146	0.0278272
FAN1	1.27492	0.0507076	1.00027	0.0186256	0.0498575
ASAP3	1.37406	0.0102945	1.00019	0.000148159	0.00988056
IL18BP	0.759587	0.0272419	0.999565	0.0122366	0.0267883
FKBPL	0.762099	0.0285645	0.998998	0.00686586	0.0279599
RPS6KA2	1.48781	0.00136822	1.00019	0.000767413	0.00126961
RNGTT	0.708849	0.00560628	0.999539	0.0641617	0.00540468
TRAPPC10	1.34956	0.0161087	1.00014	0.0324589	0.0156009
KCNE3	0.729307	0.0108917	0.999967	0.606192	0.0106048
ZNF41	1.27913	0.0462443	1.00026	0.12676	0.0452857
SOX18	0.765639	0.0312398	0.999947	0.161909	0.0310065
NANP	1.29842	0.0354462	1.00075	0.0985783	0.0349262
GSTZ1	0.710261	0.00591816	0.999773	0.108182	0.00563686
FBXO6	0.701111	0.00419472	0.999736	0.0328295	0.00398365
ZNF253	0.78093	0.0460282	0.999783	0.292278	0.0451801
IFI35	0.701628	0.00444403	0.999941	0.344971	0.00425472
GALNT6	0.776945	0.042208	0.999902	0.0254152	0.0418627
EML2	1.28844	0.0402689	1.00028	0.00337883	0.0393641
DYNC1LI2	1.27957	0.0458219	1.00004	0.361699	0.0452311
PTCH1	1.28391	0.0437065	1	0.953664	0.0433178
PIGA	0.734359	0.0127766	0.999416	0.123814	0.0123149
PTPRM	0.741269	0.0160424	0.999913	0.154736	0.0156925
PACSIN3	0.706065	0.00542465	0.999868	0.0951456	0.00522578
C17orf58	0.749199	0.0195179	0.999912	0.638889	0.0190068
PPP1R13L	1.4689	0.00200848	1.00019	9.23404e-05	0.00188773
MEGF8	1.32561	0.0225302	1.00006	0.00609691	0.0220314
GDPGP1	0.756017	0.0246138	0.998768	0.0110796	0.0240574
SYDE1	1.381	0.00918112	1.0002	0.00739585	0.00883601
GBP1	0.686809	0.00245863	0.999946	0.00717548	0.00233105
SLPI	1.29933	0.0342539	1	0.896964	0.0338672
CCDC159	0.736883	0.0136635	0.999879	0.577893	0.0131452
MAP3K8	0.781516	0.0466327	0.99973	0.193958	0.0464153
HCFC2	1.33551	0.0195549	1.00074	0.085751	0.0189585
CLIP2	1.27739	0.0476136	1.00009	0.0381751	0.0471925
DPH6	0.727163	0.0101804	0.999229	0.0245822	0.0098366
TRIM13	1.34872	0.0158102	1.00028	0.0592338	0.0155445
APC	1.27914	0.0476473	1.00049	0.00285979	0.0472791
SLC25A14	0.780016	0.0449388	0.999717	0.520143	0.0438399
CYB561D1	1.30632	0.0314868	1.00025	0.154841	0.0309964
BIRC5	0.731038	0.011981	0.999926	0.0636337	0.0116472
RUNX1	1.38551	0.00857923	1.00004	0.049058	0.00827926
STEAP3	1.28249	0.0459136	1.00009	0.0700691	0.0453577
FITM2	1.33629	0.0190857	1.0002	0.303693	0.0186124
GINS2	0.757441	0.0246245	0.999707	0.0709074	0.0242183
DSCC1	0.761636	0.028541	0.999816	0.438925	0.0282045
ZRSR2	0.754278	0.022765	0.999331	0.0537444	0.0221987
IMMP1L	0.764268	0.0310388	0.99966	0.245533	0.0304487
IGFLR1	0.783003	0.0479597	0.999704	0.102072	0.04747
GRAMD4	1.39829	0.00675476	1.00037	0.000131984	0.00651096
HSD11B2	0.740009	0.0152376	0.999891	0.114587	0.0148007
SUPT3H	0.65052	0.000522892	0.999704	0.285386	0.000469923
RAD51D	1.28618	0.0417744	1.00067	8.29476e-05	0.0416467
AP4E1	1.30274	0.0323121	1.00068	0.0660449	0.0317642
ARHGAP19	1.37508	0.0102576	1.00068	0.00656717	0.00984272
CCDC80	1.32938	0.021423	1.00004	0.000233234	0.0208038
LYPD1	0.771619	0.0356987	0.999993	0.182759	0.0349545
ADAM8	1.30252	0.0332524	1.00008	0.15944	0.0327062
ZNF839	0.678685	0.00176181	0.999349	0.024476	0.00164878
LIMD2	0.772496	0.0372293	0.999893	0.0987659	0.0365562
SDHAF4	0.7819	0.0464803	0.999543	0.030196	0.0456637
CBX7	1.52304	0.000820056	1.00029	0.00658581	0.000760081
LYPD6	0.698431	0.00382266	0.999695	0.0131403	0.00365651
CREM	0.776841	0.0443356	0.999803	0.261571	0.0439995
C1orf74	0.757445	0.0251156	0.998852	0.0202806	0.0246188
CENPQ	0.782493	0.0476909	0.999367	0.0811767	0.0467848
ARRDC2	1.3297	0.0220224	1.00019	0.000431082	0.0217265
TEF	1.35276	0.0150645	1.00026	0.0181831	0.0146264
WDR4	1.38706	0.00818365	1.00019	0.51625	0.00793871
CYB5R2	0.779429	0.0447269	0.999887	0.195357	0.0445336
SUSD2	1.27374	0.0508282	1.00002	0.0529724	0.0498637
ELF3	1.34108	0.0188634	1.00001	0.0483895	0.0184122
CHST15	1.27838	0.0475274	1.00006	0.114871	0.0404708
CDC14B	1.36205	0.0128787	1.00034	0.0354146	0.0124767
DTWD2	1.35672	0.0137448	1.00077	0.0186434	0.0134663
ZNF43	0.765348	0.0312708	0.999922	0.387548	0.0307566
STX1A	1.27287	0.0508036	1.00006	0.596534	0.0498196
CHST2	0.75472	0.0226794	1.00001	0.757691	0.0221961
ZMYM5	1.28371	0.0437332	1.0002	0.59403	0.0431576
PDE4A	1.44429	0.00316851	1.00013	0.139014	0.00300978
PRIM1	0.748305	0.0192578	0.999539	0.0619328	0.0186405
HLA-F	0.708208	0.00557838	0.999899	0.00684841	0.00534427
GBP2	0.730169	0.0109631	0.999905	0.0183308	0.0106754
TBC1D2	1.41038	0.00547953	1.00002	0.677003	0.0052146
HCP5	0.737	0.0140344	0.999896	0.0352157	0.0136524
KPNA3	1.47447	0.00173461	1.00016	0.0738689	0.00162462
TSTD2	1.43422	0.00370504	1.00033	0.0542188	0.00353091
IFI27L1	0.751787	0.0215643	0.999477	0.0161464	0.0210165
MFAP3	1.3332	0.0213655	1.00054	0.0390301	0.0208211
SWSAP1	0.730725	0.0119538	0.999582	0.335427	0.0116815
FRK	1.34447	0.0164944	1.00026	0.00535522	0.016068
CA5B	0.784168	0.0494306	0.99971	0.323896	0.0488869
ZHX3	1.35522	0.0141111	1.00029	0.00778765	0.0136738
ZSCAN16	0.668152	0.00116626	0.998992	0.0106564	0.00108651
TACSTD2	1.37809	0.00953595	1.00001	0.0163137	0.00922095
REPS2	1.29519	0.0366366	1.00036	0.022994	0.0360729
XAF1	0.776176	0.0404061	0.999976	0.41469	0.0400035
UBE2T	0.647756	0.000503997	0.999918	0.389213	0.000451341
DHRS4L2	0.753651	0.0225373	0.999812	0.262448	0.0220094
PALD1	1.30158	0.0332877	1.00024	0.057604	0.0327193
USP35	1.27575	0.0485998	0.999961	0.564132	0.0480511
RRAGD	0.76183	0.027736	0.99993	0.517055	0.0270468
ATP11A	1.51323	0.000866234	1.00007	0.0209547	0.000787388
MAGI3	0.731588	0.0116562	0.999739	0.0794985	0.0112854
TMEM44	1.36571	0.0116517	1.00026	0.168063	0.0114687
CAAP1	0.672432	0.0014006	0.999403	9.71573e-05	0.00130611
FAM83G	1.28063	0.045058	1.00025	0.132699	0.0444411
RALGPS1	1.30606	0.0313512	1.00024	0.0549618	0.0305843
RAB11FIP1	1.28693	0.0421697	1.00002	0.546021	0.0412462
AKAP12	1.35066	0.0149707	1.00006	0.00251051	0.0145711
DNAJB5	0.773142	0.0376605	0.999833	0.0206673	0.0373327
DIAPH2	0.758556	0.0251159	0.999722	0.0924408	0.0245847
SARM1	1.28681	0.0414012	1.00016	0.0129639	0.0411089
FOXO1	1.37567	0.0103033	1.00011	0.0601993	0.00993152
TIAM2	1.29173	0.0384692	1.00061	0.0416675	0.0388627
NUAK1	1.27357	0.0501031	1.00017	0.0156399	0.04941
TRPM2	1.38523	0.00871166	1.00035	0.00895624	0.00841037
FBXL18	1.31223	0.0280335	1.00044	0.0460054	0.0273559
EPS8	1.37709	0.0100718	1.00014	0.085504	0.0097728
ALPL	0.70722	0.00527116	0.999979	0.0140542	0.00499973
TFEB	1.33219	0.0209963	1.0002	0.165482	0.020485
DTX4	1.29778	0.0353795	1.00004	0.256649	0.0345036
ZNF93	0.615518	0.000107523	0.999757	0.0587688	9.31254e-05
ZWINT	0.712806	0.00675167	0.999787	0.00925676	0.00659442
TTC32	0.733878	0.0124296	0.999091	0.0247612	0.0119953
ANXA2P2	1.41409	0.00535805	1.00099	0.000707865	0.00514106
TEC	0.751825	0.0209942	0.999545	0.0672915	0.0206783
SPC24	0.762644	0.0302184	0.999875	0.125562	0.0298028
SHPRH	1.35929	0.0130906	1.00057	0.0123446	0.012773
FCGBP	1.70109	2.17445e-05	1.00001	0.0264574	1.75423e-05
BCAT1	0.76333	0.0287984	1	0.840376	0.0280871
ZNF880	0.697702	0.00382375	0.999535	0.12326	0.00366231
CDK6	1.30528	0.0312758	1.00006	0.26493	0.0306705
PC	1.53605	0.000558853	1.00019	0.0909456	0.000509387
GBP4	0.727551	0.010307	0.999903	0.00334316	0.0100377
CDCA7L	0.762283	0.0284759	0.999949	0.300204	0.0277967
FZD5	0.724459	0.00931927	0.999968	0.467192	0.00904277
ZNF443	0.754851	0.0236514	0.999944	0.751415	0.0235006
CACNB1	1.28559	0.0437	1.00023	0.0752122	0.0430566
ZNF79	1.28965	0.0398599	1.00178	0.033825	0.039134
GLRX2	0.779531	0.0444942	0.999265	0.10977	0.0434011
ZNF85	0.720597	0.00902361	0.999574	0.223115	0.00881827
ORC6	0.769048	0.0351558	0.999762	0.293481	0.0345125
STARD13	1.30518	0.0319863	1.00048	0.02058	0.0313134
IRS2	1.36489	0.0119997	1.00004	0.106272	0.0117898
ANXA3	0.744745	0.017224	0.99996	0.223245	0.0168949
IGF2	1.31511	0.0265565	1	0.529601	0.0262239
GATM	1.28929	0.0399153	0.999975	0.40368	0.0395107
CD200	0.783746	0.0488091	0.999943	0.152403	0.0481008
CDK14	1.34092	0.0179366	1.00015	0.0496336	0.0174258
RPL39L	0.721943	0.00860261	0.999891	0.111166	0.00830314
XRCC2	0.781231	0.046802	0.999419	0.0365198	0.0460794
PPARA	1.29694	0.0353873	1.00027	0.0127762	0.0351618
SNED1	1.34868	0.0154557	1.00013	0.0224246	0.014971
KIFC3	1.30961	0.0292928	1.00016	0.0954738	0.0286636
DGAT2	0.750134	0.0211594	0.999836	0.18719	0.0206367
SLCO2A1	1.31388	0.0277168	1.00014	0.012605	0.0268211
N4BP3	1.31135	0.0301852	1.00026	0.0176074	0.0300233
ZNF487	0.722116	0.00862688	0.999176	0.0841061	0.00831198
C2orf88	0.755981	0.0235624	0.999965	0.0241443	0.0231965
BTG3	0.750436	0.0204401	0.999962	0.127004	0.0200524
SLC25A30	1.29305	0.0373895	1.00052	0.0629745	0.0367586
TRIM4	1.50229	0.00124902	1.00022	0.0325639	0.00118558
RSAD2	0.726778	0.010099	0.99995	0.276792	0.00986124
ZNF429	0.692904	0.00317441	0.999294	0.020692	0.00300314
ZNF738	0.725994	0.0104039	0.999924	0.390578	0.0100794
PITPNM3	1.30427	0.0327599	1.00006	0.475849	0.032454
EBPL	1.33575	0.0200738	1.00017	0.0184138	0.0197703
BLM	0.769317	0.0348845	0.999424	0.0450541	0.0343319
LIPT2	0.676192	0.00160882	0.999696	0.381261	0.00151928
SPNS2	1.281	0.045038	1.00012	0.37753	0.0440578
RNASEL	1.29996	0.0343317	1.00007	0.800928	0.0337969
LBHD1	0.780036	0.0449442	1.00013	0.799932	0.0444398
ZNF708	0.776712	0.0414741	0.999902	0.765154	0.0410135
CPLX1	1.28965	0.0394787	1.00002	0.741513	0.0390621
LYPD6B	0.782493	0.0468204	0.999972	0.258011	0.0461123
IL27RA	1.28977	0.0396356	1.0002	0.000684916	0.0392337
GGT1	0.746743	0.0193085	0.999914	0.384486	0.0189338
LYZ	0.780126	0.0457333	0.999983	0.1974	0.045166
CRYAB	1.55735	0.000371899	1.00002	0.0200843	0.000334835
SLC11A1	1.29961	0.0340537	1.00018	0.0439738	0.0338358
MACROD2	0.747949	0.0188293	0.999897	0.181029	0.0183581
ZNF493	0.768509	0.0331124	0.999902	0.525779	0.0324738
CDKL5	1.31368	0.0274457	1.00011	0.632777	0.0267282
EXOC3-AS1	0.702096	0.00434908	0.999796	0.461396	0.00413714
BCL7A	0.679505	0.00188649	0.999817	0.0411836	0.00180052
TMEM91	1.28611	0.0420292	1.00093	0.0699966	0.0415369
GTF2H2	0.714806	0.00688091	0.999562	0.00739405	0.00663525
LPAR5	1.33326	0.020414	1.00036	0.0348402	0.0200724
LRFN1	1.45179	0.00260675	1.00019	0.013136	0.00244866
ARHGEF10L	1.3886	0.00827222	1.00012	0.181409	0.00792613
GBGT1	1.33679	0.0186989	1.0006	0.0270324	0.0183732
ZNF714	0.718194	0.00814952	0.999778	0.134074	0.00787569
MAGIX	0.706226	0.00511282	0.999843	0.360964	0.00491003
IFT74	0.753074	0.0219552	0.999453	0.00899424	0.0214076
TSPAN7	0.764393	0.0300019	0.999955	0.0269063	0.0294893
C1orf115	0.636638	0.00028649	0.999655	0.0204003	0.000254811
SLC4A11	1.44178	0.00334015	1.00008	0.00549845	0.00317794
ARL10	1.3719	0.0107383	1.00024	0.192256	0.0104038
TLCD1	0.654246	0.000675612	1.00009	0.565393	0.000614252
TCP11L2	1.33149	0.021345	1.00041	0.185255	0.0209512
ISG20	0.663807	0.000991161	0.99981	0.0696833	0.000909141
PARD6G	0.765904	0.03102	0.999709	0.122338	0.0307047
PGBD1	0.729134	0.0111111	0.999709	0.538305	0.0108308
LAYN	1.28322	0.0447736	1.00022	0.0449195	0.0442134
ZNF81	1.28706	0.0408637	1.001	0.0439764	0.0402492
PLK2	1.28182	0.0452976	1.00011	0.00320591	0.0446558
ACYP1	0.774227	0.0385257	0.999184	0.010034	0.0377314
SPEG	1.3078	0.0303407	1.00007	0.133011	0.0299112
BAG2	0.738323	0.0143698	0.99973	0.00677055	0.0140435
ZNF713	0.7688	0.0335468	0.999488	0.268019	0.0328717
PBK	0.744453	0.0172533	0.99982	0.0993039	0.0168647
CHAC2	0.759667	0.0277008	0.998569	0.0126396	0.0272715
SLAIN1	0.766853	0.0319081	0.999898	0.113129	0.0318145
ADAMTS15	1.27472	0.049586	1.00002	0.570228	0.0488783
RASAL1	1.35329	0.0144701	1.00014	0.0422801	0.0140897
ZNF702P	0.745039	0.0175258	0.999325	0.017231	0.0172701
EGFL6	0.719026	0.00778034	0.999842	0.0163785	0.00753343
OTUB2	0.668622	0.00117988	0.999132	0.0767916	0.0011062
SPRYD7	1.28259	0.0443691	1.0006	0.0293806	0.043905
GAS1	1.31816	0.0256375	1.00005	0.0109399	0.0248279
BATF2	0.68897	0.002846	0.999484	0.0067293	0.00270149
TNFRSF4	0.777582	0.0423549	0.99939	0.232011	0.041969
EGFL8	0.768438	0.0337553	0.999441	0.0683429	0.0333593
CSF3R	1.28939	0.0394175	0.999984	0.689534	0.0386694
TLE2	1.30866	0.0302006	1.00016	0.00210254	0.0297104
PIR	0.674924	0.00156801	0.999507	0.0100492	0.00145012
ANGPTL4	1.38742	0.00823177	1.00024	0.000345659	0.00797396
HSPA1L	0.762321	0.0284295	0.998553	0.0788526	0.0278439
AQP11	0.711485	0.00607634	0.999595	0.434016	0.00585065
ZNF256	0.782088	0.0472977	0.999572	0.316839	0.0468627
CX3CR1	1.46804	0.00203531	1.00015	0.0123846	0.00191617
RHOJ	0.77302	0.0385359	0.999886	0.736984	0.0384598
DNM3	1.29791	0.0358795	1.00004	0.849763	0.0351389
RASSF8	1.41875	0.0049015	1.00004	0.0133427	0.00464213
ADCY9	1.29594	0.0370041	1.00027	0.016778	0.0361712
PDE2A	1.41155	0.00540906	1.00038	0.156919	0.00518644
FILIP1	0.749019	0.0198075	0.999856	0.0404133	0.0194136
GCH1	0.749139	0.0200573	0.999254	0.0200744	0.0195953
STARD5	0.783228	0.0501796	0.999338	0.281703	0.0497364
ANO9	1.41064	0.00548144	1.00009	0.0423264	0.00528361
TLR5	1.36812	0.0119804	1.00024	0.13964	0.0117723
OASL	0.723664	0.0090686	0.999957	0.516349	0.00887021
PLB1	1.33992	0.0179337	1.00034	0.0389608	0.0174679
SLC51A	1.41594	0.00492558	1.00122	0.00342782	0.00480246
LPAR3	0.782297	0.0470406	0.999964	0.121533	0.0464215
TFCP2L1	1.34473	0.0169157	1.0001	0.0512251	0.0164621
C17orf67	0.72388	0.00936384	0.997606	0.00952906	0.00900207
LYNX1	1.36889	0.0111896	1.00001	0.266393	0.0108624
GARNL3	1.37391	0.0105364	1.00069	0.0798702	0.0101912
TMEM238	0.770383	0.0348905	0.999989	0.815334	0.0340556
ZNF846	0.7484	0.0192194	0.999353	0.283459	0.0187524
HPDL	0.701319	0.0044128	0.999326	0.0150628	0.00422599
ZFYVE28	1.47662	0.00168134	1.0004	0.0699805	0.00156671
CHDH	0.749829	0.019842	0.999742	0.0593995	0.0192022
CMBL	0.752969	0.022187	0.999821	0.0103297	0.0218778
NBPF10	1.44418	0.00307728	1.00079	0.00566463	0.00290899
WIPF3	0.775677	0.040227	0.999618	0.0508057	0.0393821
PDE7B	1.37187	0.010642	1.00121	0.00689216	0.010294
TRPV4	1.50751	0.000928117	1.00057	0.000512946	0.000851957
SLC16A14	0.777654	0.0441006	0.999467	0.103354	0.0434962
HMGN5	0.704783	0.00497024	0.99951	0.0283834	0.00476458
ZNF503-AS2	0.750888	0.0209394	0.999751	0.0281686	0.0203381
TNFSF13B	0.722055	0.0089427	0.99972	0.060582	0.00867189
NATD1	1.27572	0.0495267	1.00024	0.0783847	0.0491157
SAMD9L	0.783679	0.048666	0.999932	0.209088	0.0484661
CCR1	0.753047	0.022393	0.999853	0.362468	0.0220527
KCNMB3	0.759114	0.0262195	0.998962	0.118832	0.0258305
DNALI1	0.782342	0.0475078	0.999939	0.107403	0.0464748
FBXO16	0.768417	0.0335112	0.999148	0.00292011	0.0328789
SMIM10	0.718989	0.00813774	0.999243	0.0393372	0.00777739
NOVA2	1.38064	0.00908395	1.00032	0.014171	0.00876986
RNF32	0.766035	0.0314448	0.998413	0.0428187	0.0307365
DOC2B	0.772243	0.0363761	0.999994	0.830276	0.0357073
CXCL10	0.717119	0.00751273	0.999937	0.00350851	0.00721739
SOBP	0.77743	0.0420492	0.999936	0.691217	0.0416912
EPHA4	1.32729	0.0223452	1.00012	0.0342693	0.0216402
CADPS2	0.749018	0.0196084	0.999668	0.0269665	0.0192381
CSPG5	0.695853	0.00347871	0.999778	0.147554	0.0032941
ABCC3	1.27436	0.050188	1.00006	0.155002	0.0493644
FBXO17	1.38882	0.00808744	1.00005	0.208181	0.00780183
PLEK2	1.29921	0.0348919	1.00037	0.292759	0.034649
KLHL14	1.30131	0.0337179	1.00008	0.0183865	0.0334542
FAM222A	1.32006	0.0246736	0.999957	0.783863	0.0240342
TET1	0.733635	0.0132309	1.00006	0.827944	0.0129472
PREX2	0.764442	0.0301713	0.999906	0.305503	0.0297121
CEL	0.731727	0.0117486	0.999996	0.297403	0.0114317
TGM1	1.27723	0.0478322	1.00006	0.01016	0.0475707
ATP1B2	0.73276	0.0122152	0.999962	0.412039	0.0118133
FOXJ1	0.769743	0.0341263	0.999981	0.156455	0.0333512
ANKRD33B	1.45354	0.00255485	1.00005	0.129682	0.00240303
FBXO27	1.2907	0.0394017	1.00009	0.164633	0.0389757
PDZD7	1.41115	0.00529153	1.00016	0.697628	0.00508977
AGBL3	0.702769	0.00444387	0.998365	0.161107	0.00422304
S100A2	1.31879	0.0262841	1	0.988256	0.0259544
PROB1	1.27555	0.04934	1.00008	0.779416	0.0487734
APOA1	0.770672	0.0356262	0.999993	0.262904	0.0349824
ZNF726	0.701	0.00445501	0.99932	0.0660133	0.00420136
HEY2	0.740138	0.0154032	0.999937	0.252007	0.0150922
CCT6B	0.743041	0.0166796	1.0002	0.861113	0.0161822
CLTCL1	1.27811	0.0468663	1.00157	0.000282231	0.0462757
LIPG	0.756466	0.024346	0.99979	0.306851	0.0241382
IL1B	1.31042	0.0299577	1.0002	0.216559	0.0294378
USP51	0.750007	0.0201078	0.999471	0.0664602	0.0195639
LOXL4	1.4332	0.00366775	1.00014	0.0373649	0.00346638
REM2	0.729131	0.0106385	1.00001	0.990557	0.0102737
GRIP1	1.29254	0.0393658	1.00055	0.0112026	0.0388936
CACNA2D4	1.28512	0.0426729	1.00084	0.104701	0.0425587
TMOD2	1.2851	0.0423648	1.00053	0.0869327	0.0420623
EID3	1.33964	0.0178158	1.00318	0.00911013	0.0173124
NKD1	1.38825	0.00813075	1.00014	0.143418	0.00782111
SULT1A2	0.758198	0.0256659	0.997319	0.00258333	0.0253039
ZNF135	0.708756	0.00557939	0.999624	0.153988	0.00535487
SCN4B	1.43125	0.00378382	1.00041	0.235786	0.00361306
LRRC17	1.326	0.0229816	1.00006	0.385261	0.0225625
C2orf16	1.4418	0.00339542	1.002	0.0537757	0.00323179
RIPK4	1.62034	0.00011572	1.00019	0.00502355	0.000100129
LYVE1	1.31489	0.0271947	1.00031	0.0023187	0.0266654
SMAD9	1.29402	0.0384003	1.00038	0.259375	0.0377723
APOL4	0.697514	0.00376371	0.999917	0.25822	0.00358643
HESX1	0.774987	0.0397607	0.997712	0.319519	0.0393076
OAZ3	0.714738	0.00673593	0.996026	0.0651563	0.00647779
PCDHB13	0.780404	0.0458964	0.999577	0.036249	0.0455263
LRRC3	1.34479	0.0169536	1.00023	0.405802	0.0164605
FOXP3	0.655627	0.000716194	0.998801	0.0231281	0.000652536
GPR27	0.712394	0.00616116	0.999748	0.00552127	0.00592369
PIFO	0.754455	0.0226786	0.999943	0.363683	0.0219261
LAG3	0.775164	0.0397801	0.999725	0.194769	0.0391802
STXBP6	0.751528	0.0208597	0.999929	0.0509523	0.0203654
EFNA5	1.42375	0.00457457	1.00023	0.000769033	0.00437866
CD96	0.774546	0.0391065	0.999062	0.0372528	0.0387969
CACNA1C	1.43517	0.00351686	1.00053	5.41561e-05	0.00333508
HMCN2	1.45686	0.00250715	1.00013	0.000639321	0.00235261
ARHGAP6	1.28368	0.0460657	1.00058	0.0558481	0.0457591
KIF26B	1.28826	0.0408905	1.00016	5.17994e-05	0.04014
SPAG8	0.769738	0.0345071	0.99991	0.737625	0.0335672
CERS1	0.7728	0.0386024	0.999953	0.797744	0.0382156
CLEC5A	1.41	0.00567509	1.00041	0.0251723	0.00548521
MCOLN2	0.77869	0.0434873	1.00005	0.724479	0.0427818
UST	1.35754	0.0138532	1.00064	0.00360402	0.0134453
MNS1	0.734763	0.0129794	0.999799	0.303419	0.0125245
HSPB7	1.31583	0.0264993	1.00081	0.000178565	0.025793
TRBC2	0.772915	0.0376958	0.999544	0.00298868	0.0371979
PPP1R3C	1.38131	0.00926724	0.999856	0.365259	0.00893088
SNCA	1.3866	0.00851286	1.00025	0.272036	0.008284
SELL	0.6337	0.000251003	0.999477	0.0111269	0.000223457
ETV7	0.706585	0.00517983	0.999504	0.0285486	0.00502079
ADORA3	1.38877	0.00819353	1.00045	0.0091477	0.00789903
HR	1.2799	0.045796	1.0001	0.319458	0.045267
ERVMER34-1	0.665751	0.00105083	0.999478	0.125592	0.000960831
MFAP4	1.33367	0.0203105	1.00003	0.0105281	0.0198145
WNK3	0.766994	0.0332903	0.99989	0.743436	0.0326825
C2orf74	0.645464	0.000432871	0.99931	0.00175012	0.000387328
NPAS3	0.766753	0.0315232	0.999921	0.188942	0.0309476
PANO1	0.744291	0.0178251	0.994398	0.0191949	0.0174211
MICB	0.778127	0.0423604	0.999667	0.0270001	0.0417182
CD27	0.782728	0.0482758	0.998946	0.00774933	0.0476021
CCL8	0.719292	0.00786228	0.999438	0.0713353	0.00757247
PODNL1	1.31803	0.0255949	1.00021	0.00250671	0.0251149
PI3	1.56149	0.000342772	1.00003	0.0229568	0.000304965
PODN	1.31631	0.0260937	1.00013	0.00869564	0.0254556
TEKT2	0.68627	0.00243602	0.999857	0.259976	0.00226525
FCRLB	1.28741	0.0412743	1.00029	0.241806	0.0409604
ITGA10	1.36777	0.011509	1.00117	0.138495	0.0129076
FBXO24	1.36194	0.0125767	1.00662	0.0716666	0.0123634
BCL2L14	0.663422	0.000942793	0.999351	0.223023	0.000865984
LILRA2	1.52781	0.000632464	1.00128	0.00853959	0.000570217
FAM27E3	0.693141	0.00313158	0.997805	0.00957994	0.00296242
SAMD13	0.722075	0.00844656	0.998211	0.0458081	0.00814469
ARHGEF26	0.703818	0.00477393	0.999182	0.0721408	0.00457812
TRAC	0.772468	0.0371687	0.999625	0.00607771	0.0367693
GBP5	0.746345	0.0184437	0.999793	0.0198499	0.0180409
UBD	0.702286	0.00432173	0.999904	0.0201719	0.00413493
IGHM	0.708957	0.00576996	0.999999	0.642945	0.00557067
TREM1	1.37327	0.0106887	1.00056	0.0601842	0.0103688
HLA-DOB	0.668437	0.00115889	0.998346	6.08416e-05	0.00108259
SNRPGP15	0.730858	0.0119096	0.98913	0.00790868	0.0115343
NRG4	0.744526	0.0175917	0.999423	0.0121096	0.0171398
GPAT2	0.747812	0.019118	0.999843	0.0914544	0.0187718
NR6A1	1.36881	0.0110157	1.00009	0.76712	0.0106602
ZNF826P	0.730214	0.0115158	0.999842	0.0815795	0.0112311
FAM181A	0.755925	0.0239528	0.999715	0.0310132	0.0234733
SFRP1	1.30591	0.0307994	1.00002	0.0665621	0.0302536
LYG1	0.78367	0.0486607	0.995643	0.0219241	0.0481013
GFPT2	1.33408	0.0197264	1.00036	0.0129416	0.0192761
MYCN	0.774427	0.0389027	0.999951	0.362249	0.0385787
HES2	1.29839	0.0346408	1.00014	0.455751	0.0339477
ACOT1	0.754932	0.0229339	0.99947	0.206991	0.0224328
TYMSOS	0.727571	0.0103441	0.998939	0.116232	0.0100511
CD274	0.781303	0.0459505	0.998614	0.0373287	0.045457
GJB1	0.732658	0.0120215	0.99992	0.135775	0.0117259
PLCH1	0.707333	0.00514809	0.999186	0.00151703	0.00491241
KCNMB4	0.784088	0.0495972	0.999995	0.956435	0.049443
STAT4	0.748811	0.0198032	0.99899	0.151694	0.0193542
SPRED3	1.33995	0.0185147	1.00015	0.624472	0.0181108
MUC4	1.35567	0.0138174	1.00003	0.0542533	0.0133376
SPATA17	0.771634	0.0362123	0.999552	0.100012	0.0355017
CXCL9	0.731238	0.0117724	0.999896	0.00169301	0.0114818
IDO1	0.73026	0.0110055	0.999928	0.0675122	0.0107034
GDF9	0.769744	0.0344684	0.997395	0.105502	0.0336534
BFSP1	0.62834	0.00020478	0.998715	0.103441	0.000181702
PABPC3	1.38455	0.00872608	1.00405	0.0118116	0.00853292
GLS2	0.770074	0.034677	0.999533	0.192238	0.0339827
BRWD1-AS2	0.730238	0.0111824	0.996653	0.0708887	0.0109279
WNT5B	1.28515	0.0433592	1.00026	0.0185479	0.0429411
GALNT15	1.29301	0.0376829	1.0003	0.114513	0.0369904
NGFR	1.39523	0.00723262	1.00007	0.163271	0.0069133
ACKR4	0.759565	0.0260523	0.999591	0.339254	0.0255068
PCDHB12	0.748858	0.0195884	0.999832	0.729067	0.0191487
CD38	0.586767	2.38416e-05	0.999406	0.00943497	1.92458e-05
DYDC2	0.700967	0.00416109	0.999782	0.479104	0.00389248
ATP1A3	1.39865	0.00664088	1.00018	0.00113113	0.00637428
DNAJB13	0.76099	0.0273022	0.999803	0.0151186	0.0265888
CXCL11	0.672105	0.00142581	0.999661	0.000162118	0.00133681
AHRR	1.54163	0.000541488	1.00109	0.0128781	0.00049078
ZNF454	0.78173	0.0462461	0.998625	0.162243	0.0455964
IL7R	0.750116	0.0200318	0.999912	0.565617	0.019586
CLDN6	0.756374	0.0249288	0.999991	0.180621	0.0247117
ICAM5	1.28189	0.0447823	1.00005	0.644479	0.0439559
CDRT4	0.78505	0.0500165	0.99939	0.164328	0.0496399
ADGRF1	1.28903	0.0408555	1.00006	0.358886	0.0400966
ILDR2	1.29674	0.0354687	0.999954	0.797664	0.0348881
DLX5	1.27713	0.0481293	0.999841	0.189271	0.0475249
ZNF486	0.780364	0.0461234	0.999991	0.890531	0.0455741
SPATA1	0.724794	0.00921104	0.988286	0.0301765	0.00893972
VNN1	1.29846	0.0353558	1.00004	0.656819	0.0348785
PTPRD	1.27418	0.050427	1.00034	0.0273951	0.0494975
MATK	1.43746	0.00351137	1.00068	0.0156538	0.00332697
PFN4	0.774256	0.0382222	0.99141	0.00706363	0.0374662
FAM166B	0.655724	0.000660763	0.999963	0.826531	0.000591845
MEI1	0.757453	0.0248812	0.999076	0.10691	0.0244285
TXK	0.782799	0.0475598	0.999511	0.349109	0.0472978
PRSS16	0.737369	0.0140161	0.999688	0.00096952	0.0137561
GPC3	0.72969	0.0111541	0.999995	0.697124	0.0108377
NTN5	1.37575	0.010074	1.00173	0.0279652	0.00970884
GPR37	0.727319	0.00991014	0.999481	0.138201	0.00965393
KCNJ10	0.743605	0.0171922	0.999011	0.19413	0.0168179
PCDHB5	0.77199	0.036241	0.999937	0.244442	0.0356412
KCNT1	1.38412	0.00845881	1.00025	0.0380118	0.00817236
VSTM2L	1.31807	0.0255759	1.00011	0.000667302	0.0252041
ZNF257	0.708923	0.00587188	0.999481	0.117482	0.00565239
PRAME	0.718703	0.00769631	0.999963	0.0392988	0.00733109
PIANP	1.45376	0.00260408	1.00009	0.169015	0.00247742
CD79A	0.750002	0.0207314	0.999579	0.00768564	0.0203657
MZB1	0.751999	0.0227244	0.999691	0.0099036	0.0222162

## Sheet: 1481SRGs
Table S2. Results of Continuous Cox Analysis and Grouped Cox Analysis for 1481 SRGs in GEO.
gene	HR_group	p_group	HR	p	logrank_p
RPS16	1.48025	0.0280261	1.00007	0.211424	0.0378432
CFL1	0.690592	0.0391951	0.999866	0.0715135	0.0461419
RPS23	1.68412	0.00361675	1.00016	0.0814223	0.00265599
RPS12	1.46129	0.0330625	1.00002	0.717757	0.0477541
RPS27	1.35083	0.0955761	1.0002	0.0638921	0.04395
EEF2	1.47938	0.0287309	1.00023	0.0342773	0.0224769
RPL6	1.45645	0.0345496	1.00019	0.211479	0.049279
EEF1D	0.672967	0.027403	0.999843	0.240665	0.0350048
COX5B	0.65276	0.0175149	0.999875	0.269391	0.0103363
TMA7	0.686116	0.0387184	0.999644	0.0642174	0.0345897
LAPTM4B	0.615305	0.00682054	0.999669	0.0194936	0.0118781
PNPLA2	1.47585	0.0321928	1.00046	0.184707	0.0401993
MTCH1	0.707647	0.0563516	0.999383	0.00566711	0.0465101
EIF3H	0.67687	0.0288615	0.999604	0.0514098	0.0490668
IER2	0.700515	0.0466992	0.99981	0.171531	0.0420887
MYL12B	0.688587	0.0353641	0.999713	0.282055	0.0246639
ITM2B	1.51046	0.0210881	1.00026	0.113308	0.0317615
NDUFA13	0.676649	0.0312286	0.999815	0.155494	0.0247709
ASS1	0.701784	0.0474817	0.999848	0.339129	0.0320374
CLTC	0.651109	0.0190772	0.999564	0.0426063	0.0156012
TFRC	1.36217	0.0825517	1.00025	0.0178564	0.0355589
TAGLN2	0.67005	0.0254352	0.999402	0.0165972	0.017079
MUC1	0.696881	0.0469808	0.999864	0.167646	0.0301504
PSME1	0.701358	0.0467567	0.999429	0.00574136	0.0297346
GDI2	0.681159	0.0314445	0.999556	0.0558362	0.039754
ATP5I	0.644757	0.0140701	0.999637	0.0573184	0.0247534
S100A13	0.697184	0.0423625	0.99971	0.101348	0.0345931
NAP1L1	1.63957	0.00572904	1.00036	0.0877429	0.00732192
SEC11A	0.697799	0.0441847	0.999651	0.286918	0.0284959
EIF4G2	1.28585	0.155512	1.00017	0.482792	0.0449963
MAGED1	0.625398	0.00910006	0.999558	0.124358	0.00493566
SAT1	0.650102	0.0158671	0.999575	0.0337717	0.0198642
CALR	0.58718	0.00325643	0.998967	0.000296949	0.00181222
SNX3	1.47533	0.0296053	1.00025	0.359577	0.0242075
TM4SF1	0.680257	0.031751	0.999642	0.0447838	0.0200188
TSC22D1	1.45187	0.03604	1.00029	0.0946721	0.0288869
FLOT1	0.688015	0.035948	0.999	0.00148713	0.0317656
ASAH1	1.74492	0.00221228	1.00049	0.0213668	0.00271742
DCN	1.63995	0.00531999	1.00036	0.0011025	0.00383665
UCP2	0.57799	0.00229179	0.999497	0.00222247	0.00334289
YWHAZ	0.707533	0.0514308	0.999576	0.0248692	0.0359326
TMEM59	0.692161	0.039359	0.999724	0.271188	0.0340711
CST3	0.690498	0.037788	0.999766	0.318406	0.0252445
CMTM6	0.629898	0.0127813	0.999333	0.00606815	0.00944094
PUF60	0.548484	0.00118147	0.999105	0.000592442	0.000616516
IFI27	0.663769	0.0217023	0.999775	0.0457853	0.0132366
CEBPD	1.48334	0.0303022	1.00027	0.0651095	0.0286158
LY6E	0.615449	0.00697911	0.999553	0.0117106	0.0128893
UBA1	0.514952	0.000373784	0.999496	0.0433838	0.000259249
NME1	0.666048	0.0256496	0.999845	0.48561	0.0339094
ECHS1	0.549239	0.000983091	0.99911	0.0172089	0.00123997
EIF4A3	0.689416	0.0374768	0.999423	0.108388	0.0422888
CSNK2B	0.676054	0.0279415	0.999233	0.0342974	0.04905
ANAPC5	0.673306	0.0268624	0.999057	0.0717504	0.0257445
NDUFV1	0.658864	0.0199181	0.999354	0.0185416	0.0235308
FOLR1	0.680127	0.0313651	0.999798	0.0640066	0.0231145
DHCR24	0.619404	0.00801156	0.999497	0.0135736	0.0256614
BCAP31	0.670023	0.0289065	0.999445	0.0254458	0.0175063
E2F4	1.6139	0.00858639	1.00189	0.018631	0.0104805
SND1	0.660306	0.0227302	0.998798	0.0303271	0.0193453
ARMCX6	0.551282	0.00135292	0.998906	0.0287621	0.00176985
AURKAIP1	0.71287	0.0576195	0.999459	0.142184	0.0394868
CCT5	0.710448	0.0543074	0.998896	0.0108487	0.0439723
2023-09-07	1.64622	0.00603528	1.00075	0.0563451	0.00703231
GPAA1	0.565683	0.00165064	0.999096	0.0111846	0.0012455
RASSF7	0.65227	0.0193814	0.9986	0.0467675	0.0127629
PTBP1	0.684451	0.0358426	0.998785	0.0333666	0.023188
RPN1	0.569567	0.00246045	0.999007	0.0286157	0.0028684
C19orf53	0.606862	0.00548557	0.999156	0.0444335	0.0035806
IGFBP5	1.46531	0.030831	1.00046	6.75186e-05	0.0122308
HSPA9	0.681605	0.0346681	0.999529	0.246571	0.0290729
RING1	0.621127	0.00745791	0.996852	0.021012	0.00952946
ATP1A1	0.648462	0.0173339	0.998309	0.00159608	0.0404628
IGFBP3	1.54371	0.0144592	1.00073	0.00170357	0.00612918
UBL5	0.70016	0.046282	0.999374	0.0383225	0.0321271
SNRPD3	0.652331	0.0167068	0.999246	0.131853	0.0266878
CCT2	0.595495	0.00397729	0.999094	0.0359717	0.00267522
NDUFS6	0.669286	0.0276336	0.998871	0.0100896	0.0227932
MSLN	0.532792	0.000868496	0.999463	0.00183305	0.00114661
RAD23A	0.630845	0.0104905	0.99811	0.000494959	0.0203012
MAT2A	0.617203	0.00905411	0.999123	0.093371	0.00662946
VPS28	0.605649	0.00619107	0.999131	0.0233481	0.00359849
NSA2	1.60469	0.00806148	1.00084	0.0688259	0.0059612
VPS35	0.678702	0.0323592	0.998587	0.0146847	0.0250811
RBX1	0.658433	0.0196283	0.999913	0.805175	0.0158729
ALCAM	0.698077	0.0438737	0.999347	0.0145643	0.0279754
FASTK	0.653805	0.0183842	0.998494	0.00817428	0.028647
SCNN1A	0.665635	0.0256054	0.999542	0.108488	0.0169165
CNPY2	0.660112	0.0215778	0.999358	0.206744	0.0339312
SYNGR2	0.689307	0.0367475	0.999054	0.0100302	0.0302211
AP3S1	1.57497	0.0104165	1.00079	0.150992	0.0140942
COL4A1	1.39556	0.0601248	1.00047	0.123751	0.047408
DNASE2	0.595729	0.00412071	0.997668	0.00900041	0.00569469
DAG1	0.519669	0.000824087	0.998052	0.0038171	0.00127869
TSPO	0.714176	0.0605714	0.999011	0.0369263	0.0447477
POLR2H	0.620798	0.00841765	0.99904	0.0865389	0.0121043
TNFRSF1A	0.605289	0.00596747	0.998558	0.0692405	0.00416624
PITPNB	0.685301	0.0334755	0.999498	0.505819	0.0436851
LRP10	0.668162	0.0247762	0.998495	0.0160637	0.0156651
POLR2B	0.705057	0.0500487	0.998414	0.0465919	0.0437458
PSMB5	0.646874	0.014855	0.999319	0.201861	0.0295141
ARF5	0.616861	0.00785312	0.997846	0.000927285	0.00991014
COPE	0.517917	0.000374856	0.998766	0.0111493	0.00132422
MRPL49	0.674516	0.0284423	0.999194	0.25464	0.0171922
GSTK1	0.504096	0.000169767	0.997712	0.000100112	6.57569e-05
SDHA	0.656283	0.021848	0.997743	0.010352	0.0161721
AHCY	0.631891	0.0112705	0.99943	0.218963	0.00787383
CFB	0.575145	0.00220193	0.999423	0.0369148	0.00147159
HK1	0.673838	0.0268496	0.998137	0.021563	0.032051
AKR1A1	0.67294	0.0271029	0.998447	0.0587202	0.0161457
GAK	0.70986	0.058703	0.998474	0.0112975	0.0376775
PPP1CA	0.661099	0.0206545	0.998318	0.00198944	0.0314293
PTDSS1	0.687386	0.0359052	0.998803	0.0649074	0.0254058
ENY2	0.612852	0.00678866	0.999078	0.077802	0.00568245
LSM4	0.566251	0.00183941	0.998899	0.0296845	0.0021162
ID4	0.71861	0.0631692	0.99941	0.0319485	0.0420204
DDAH2	0.644253	0.0161588	0.998725	0.00410229	0.0194718
AKR1B1	1.37516	0.0720024	0.999989	0.982757	0.0342429
EIF6	0.660526	0.0214848	0.998379	0.0119052	0.0293402
VAMP8	0.671204	0.025359	0.999321	0.0403156	0.0164806
REC8	0.651668	0.0169456	0.99943	0.10281	0.0268485
PTGS1	0.660442	0.0205047	0.999222	0.0187188	0.012112
TNS3	0.643587	0.0143736	0.999698	0.525841	0.0112835
DNPEP	0.725281	0.0739627	0.998167	0.0895207	0.0494038
PSMA5	0.620983	0.00836457	0.999054	0.072525	0.0050876
CHTOP	0.643858	0.0157074	0.997275	0.0339727	0.0133359
MRPS35	0.719347	0.0629775	0.999547	0.333328	0.0447536
SRRT	0.629239	0.0112075	0.99837	0.0167437	0.00721121
PRR13	0.643634	0.0141782	0.998225	0.0148167	0.032358
GRHPR	0.688151	0.0370295	0.998365	0.015828	0.0278917
CKS2	0.707646	0.0504656	0.999986	0.953264	0.0465911
TIAL1	0.600901	0.00497189	0.9986	0.108352	0.00319566
SLIRP	0.709961	0.0548161	0.999502	0.342404	0.0357743
ILVBL	0.58577	0.00345461	0.998292	0.00640204	0.00542707
PALLD	1.59733	0.00883083	1.0007	0.00670031	0.0136801
LIMA1	1.63217	0.00637148	1.00142	0.0161129	0.00189302
CNDP2	0.671025	0.0262545	0.998707	0.0564188	0.0186214
EXOSC4	0.669402	0.0248299	0.998563	0.00734435	0.0331708
HSPE1	0.67895	0.0300186	0.99967	0.540475	0.0187599
LMO4	0.663683	0.0242504	0.99822	0.00890139	0.015291
AZIN1	0.68965	0.0373964	0.999451	0.313004	0.0301376
FAM32A	0.54953	0.00102003	0.995518	0.000568097	0.00185187
ARID5B	1.481	0.0284391	1.00116	0.0472441	0.0100479
HEXA	0.637902	0.0131099	0.997349	0.0184654	0.00968325
KRT10	1.48537	0.0258648	1.0014	0.136228	0.0318753
VEGFA	0.599767	0.00403385	0.99811	0.0106046	0.00263306
TSKU	1.48285	0.0274095	1.00378	0.00125667	0.0408585
WWOX	1.32892	0.116182	1.00337	0.0310809	0.0480222
PDCD6	0.676382	0.0286269	0.998386	0.00909244	0.0235932
GMPS	0.616965	0.00751323	0.998309	0.0401215	0.00528163
SERPINF1	1.47705	0.027909	1.00063	0.00331265	0.0336649
BUD31	0.688458	0.0371741	0.999158	0.11157	0.0233003
MCM3	0.688656	0.0371232	0.997894	0.00966989	0.0346296
TIMP3	1.50638	0.021543	1.00195	0.000774243	0.00811965
SH3BGRL3	0.645262	0.0153785	0.99926	0.263509	0.0265294
PARP6	0.680911	0.0337189	0.997411	0.0472741	0.0325766
FKBP2	0.678292	0.0335938	0.997558	0.00759164	0.0226727
DAP3	0.685131	0.0342797	0.99818	0.157277	0.0231946
PDHA1	0.615807	0.0081391	0.999014	0.107237	0.00460058
G6PC3	0.711512	0.0616169	0.997394	0.0655254	0.0483891
PPP2R5D	0.681613	0.0314937	0.996692	0.115082	0.0398966
IRAK1	0.654159	0.0178028	0.999006	0.110646	0.023828
SLC52A2	0.58704	0.00307598	0.997668	0.00236465	0.00177958
LYPD1	0.651854	0.0167967	0.99933	0.0135819	0.0191503
ATG4B	0.618545	0.00827689	0.997045	0.0162852	0.0241593
SMIM7	0.63317	0.0123075	0.996563	0.00839016	0.0078555
GSDMD	0.516357	0.00033811	0.996222	0.000483796	0.000131663
MUC16	0.558815	0.00151983	0.999395	0.0134471	0.00453774
S100A1	0.622503	0.00788466	0.998928	0.0146943	0.00500089
MKRN1	0.7001	0.0456064	0.996964	0.0106375	0.0433341
EPS8L1	0.547898	0.00111101	0.998075	0.00834151	0.000814982
DHPS	0.551153	0.00116802	0.995101	0.000112849	0.000741835
DDX49	0.574658	0.0024239	0.994102	0.000545021	0.00355822
MRPL11	0.716699	0.0641689	0.999269	0.248816	0.0419933
ASRGL1	0.690702	0.0394193	0.999325	0.146877	0.0402841
VCP	0.702466	0.0492496	0.998285	0.0321657	0.0341773
EBAG9	0.724174	0.068227	0.998696	0.0511108	0.0489031
FDPS	0.61122	0.00620753	0.998242	0.0411415	0.00745958
DNTTIP2	0.675135	0.0280398	0.998379	0.217266	0.0173197
SULT1A1	0.656344	0.022348	0.997095	0.0026293	0.0417337
DOK5	0.479847	9.88258e-05	0.9985	0.00129871	0.000281328
OFD1	0.694491	0.0465743	0.998327	0.0633922	0.0307712
RNF167	0.694268	0.0423289	0.995369	0.0123883	0.0364524
MMP14	1.49275	0.0241938	1.0023	0.0573592	0.029228
GNG10	1.51505	0.0212381	1.0008	0.352484	0.0128212
RNF4	0.71028	0.0599371	0.997305	0.030509	0.0436728
CHPF2	0.640943	0.013326	0.996589	0.0523657	0.00816635
CPNE1	0.704634	0.0495897	0.999391	0.308835	0.0314127
YIPF2	0.54456	0.000782024	0.993613	0.00150384	0.000550196
MYH11	1.49394	0.0262101	1.00025	0.00576463	0.0275709
MAPKAPK3	0.574837	0.00217749	0.994639	0.002901	0.00199217
PPP1R14B	0.660806	0.0234887	0.997264	0.000410025	0.0174916
HLA-DMB	0.632367	0.0106958	0.998683	0.0105853	0.00708586
DDX11	0.713353	0.0592405	0.998202	0.157538	0.0381369
MRPL4	0.649522	0.0167773	0.997047	0.00356062	0.0103649
BACE2	0.558668	0.00146129	0.9982	0.0133111	0.000721191
CCND3	0.723542	0.0693312	0.997772	0.0596448	0.0489327
BRD9	0.694271	0.0465257	0.995634	0.00664976	0.0323816
YIF1A	0.687059	0.0354789	0.998276	0.0807178	0.0251154
SULT1A2	0.684318	0.0333439	0.995833	0.00662484	0.0217489
TUBB6	1.5149	0.0192475	1.00187	0.00338692	0.010454
RBM10	0.64553	0.0149379	0.99828	0.0757092	0.0190197
PTK2	0.577863	0.00219487	0.997253	0.00933169	0.00119719
PIN4	0.643033	0.0144651	0.997421	0.0211649	0.0130709
LRPAP1	0.599163	0.00530972	0.99677	0.0069663	0.00333505
TOX4	0.686658	0.034248	0.995097	0.0158685	0.0214245
VRK3	0.712298	0.0566177	0.996308	0.177699	0.0383963
RNF114	0.67279	0.0268563	0.99968	0.700782	0.016298
NFIB	1.46095	0.0333101	1.00006	0.902271	0.0405846
MRPL16	0.607666	0.00547755	0.997042	0.037676	0.00636232
OLFML3	1.43908	0.0397851	1.00063	0.0364686	0.0312534
GPRC5B	0.699927	0.0458958	0.99791	0.00514187	0.0332802
CHMP1A	0.644855	0.0158699	0.995225	0.000255092	0.0400157
NUP107	0.585374	0.0030589	0.997576	0.0314735	0.00357984
PKP3	0.547905	0.000826537	0.997012	0.000964521	0.000436587
TECR	0.679122	0.0335899	0.997142	0.00105312	0.0244177
HLTF	0.654905	0.0189907	1.00058	0.320455	0.0188195
PLS3	1.55422	0.0148039	1.00115	0.0237023	0.0178854
STX10	0.603916	0.00521039	0.9956	0.0069239	0.00589568
PSMB8	0.624899	0.00915852	0.998747	0.0176003	0.00620456
IL1R1	1.57676	0.0108288	1.00149	0.0373092	0.0111425
BABAM1	0.688874	0.0405486	0.997532	0.0350723	0.0285173
KLK11	0.636119	0.0123871	0.998755	0.0237335	0.00994052
LAGE3	0.612788	0.00649542	0.998667	0.128372	0.0117264
DDX39A	0.702976	0.0468168	0.997504	0.00267324	0.0404672
TST	0.674186	0.0285259	0.998878	0.276538	0.028072
GPBP1L1	0.588092	0.00347657	0.997088	0.0205456	0.0035466
PARP12	0.635848	0.0116165	0.997717	0.00235414	0.0071849
MAPKAPK2	0.694244	0.0443376	0.997109	0.0968369	0.0279653
IFIT3	0.622219	0.00781017	0.997862	0.0112406	0.00478384
CHI3L1	0.55422	0.000990954	0.999204	0.0450229	0.00114621
GYPC	1.56771	0.0121514	1.00314	0.0155662	0.016522
QDPR	0.637004	0.0116662	0.998686	0.216541	0.0129834
PSMB9	0.616293	0.00704138	0.99907	0.0268444	0.00465593
GNAI2	0.685346	0.0383095	0.999329	0.686586	0.0235004
ST6GAL1	0.592882	0.00332507	0.998092	0.017277	0.00307628
ECHDC2	0.568583	0.00209274	0.998529	0.212493	0.00138943
ANXA6	1.42997	0.0438981	1.00113	0.0347563	0.0354744
ORC4	0.588875	0.0032335	0.99974	0.70637	0.00318543
MAP3K11	0.628208	0.0104755	0.995553	0.00187133	0.0102731
CIB1	0.721776	0.0693174	0.996914	0.00088167	0.0474622
TRIM33	0.607932	0.00538685	0.997542	0.0217019	0.00330322
TYMP	0.667976	0.0237148	0.998281	0.042998	0.0157937
WASF2	1.476	0.0284941	1.00139	0.23696	0.0255011
DERL1	0.617739	0.00737983	0.996916	0.00242728	0.0194341
FAM111A	0.674096	0.0283484	0.997838	0.0927494	0.0349339
TCF20	0.653329	0.0190695	0.997828	0.182866	0.0196074
NIT2	0.68098	0.0316072	0.998575	0.0962388	0.0347598
TAP1	0.593613	0.0037326	0.998752	0.00781107	0.00347325
FYN	1.58573	0.010596	1.00071	0.0853513	0.0147622
EID1	1.56332	0.0121912	1.00114	0.172628	0.00630648
IL6ST	1.49389	0.0245552	1.00098	0.0605126	0.0359934
GRSF1	0.647951	0.0167224	0.998017	0.00590239	0.0115078
RNPEP	0.566955	0.00202816	0.997215	0.0259116	0.00118067
FAM3A	0.571181	0.00186149	0.99701	0.05403	0.0020637
AKR1C1	1.37557	0.0764814	1.00065	0.0385764	0.0493666
TIMM13	0.70661	0.0570956	0.998678	0.151314	0.0422511
NUP62	0.643437	0.0142602	0.995737	0.00189593	0.0148734
KXD1	0.690917	0.038845	0.994825	0.00300348	0.0390456
IFT52	1.35998	0.0850035	1.00143	0.184142	0.0406748
NR2F2	1.60903	0.00799201	1.00274	6.08924e-06	0.00423195
ITPR3	0.716061	0.0612153	0.997218	0.0013042	0.0434705
HOXD1	0.491195	0.000110362	0.998532	0.00919342	0.00024403
SDF2L1	0.674041	0.027874	0.998401	0.15417	0.0281929
WWC1	0.652911	0.0202512	0.997205	0.00404431	0.0165965
P4HTM	0.602226	0.00510653	0.995896	0.00328026	0.00386672
MTMR1	0.717317	0.0604721	0.997888	0.0666567	0.0409042
GRINA	0.668163	0.02521	0.99788	0.0130844	0.0175322
FLII	0.688015	0.0389167	0.994625	0.0488723	0.0289598
SLC39A4	0.615527	0.0073755	0.997938	0.00083577	0.0119562
DPYSL2	1.45311	0.034853	1.00128	0.037567	0.0363231
ISYNA1	0.663035	0.020941	0.998505	0.0163811	0.0155456
IMP4	0.670168	0.0254022	0.997828	0.125455	0.0298378
AP1M2	0.637708	0.0118823	0.995808	0.000788464	0.0312111
LRRC8D	0.646635	0.0142372	0.996433	0.0166729	0.00933257
TMED1	0.691634	0.0384283	0.995307	0.00401536	0.0295146
COPG1	0.58245	0.00357385	0.996401	0.000576679	0.00219944
BANP	0.675553	0.0299808	0.997154	0.0296266	0.0351264
CAPN1	0.670166	0.0263861	0.996813	0.00936833	0.0218541
DXO	0.70727	0.0516975	0.992878	0.00754312	0.0398329
MRPS7	0.681821	0.0332549	0.998406	0.0797223	0.0359086
HMGB3	0.607991	0.0057258	0.997853	0.0957205	0.0190604
MAN2B1	0.668952	0.0272696	0.996407	0.00649596	0.022422
EXOSC7	0.674875	0.0295452	0.995726	0.00791372	0.0269962
SLC50A1	0.630477	0.01087	0.998199	0.279581	0.00766011
REPIN1	0.675999	0.0306748	0.995457	0.00477934	0.0262129
ATP6V0A1	1.33231	0.10578	1.0021	0.258429	0.049979
CCNL1	0.693805	0.0395442	0.997925	0.064602	0.0466461
ARL2BP	1.61961	0.00851095	1.00337	0.0309605	0.0118265
RDH11	1.57939	0.0121097	1.00244	0.118033	0.0148564
NPRL2	0.493738	0.000302956	0.995719	0.0043223	0.000153633
RMDN3	1.45979	0.034161	1.00282	0.204933	0.0236916
NOL11	0.601414	0.00486727	0.997098	0.0163631	0.00257423
NARF	0.626118	0.0101279	0.996152	0.00039353	0.00822057
DHRS7	1.52403	0.0203384	1.00131	0.157883	0.0104268
SEMA3F	0.676176	0.0304515	0.998641	0.0983681	0.0235799
TCTN2	1.52669	0.019104	1.00179	0.104341	0.0289485
COLGALT1	0.621302	0.00838533	0.9945	0.00128106	0.00640929
RBM47	0.571318	0.00207205	0.997471	0.013801	0.00117007
MPZL1	1.5921	0.0103242	1.00437	0.0477283	0.00776233
NDUFS7	0.72285	0.0699636	0.999485	0.680676	0.0480647
COA4	0.659235	0.0201479	0.997128	0.0185144	0.0220264
TFE3	0.570161	0.00253024	0.996449	0.0160651	0.00565204
SLC29A3	1.76942	0.00172083	1.00813	0.00275533	0.00109917
DCAF11	0.582729	0.00322274	0.994885	0.0147341	0.00596351
FAM50A	0.574782	0.00234406	0.998041	0.0587613	0.00127211
ANGPTL2	1.5268	0.017779	1.00299	0.000363225	0.0130377
AMPD2	0.569909	0.00210143	0.993338	5.51342e-05	0.00198425
MRPS11	0.620873	0.00776137	0.997705	0.158495	0.00780408
POLR2F	0.605363	0.00534016	0.999541	0.663076	0.00308995
LTBP1	1.67456	0.00397642	1.00016	0.515956	0.000377398
MOSPD3	0.662777	0.020393	0.993628	0.0429769	0.0151879
ZNF236	1.44524	0.0409599	1.00392	0.00167509	0.0424734
HSPA4	0.703995	0.0490067	0.998192	0.093511	0.0378759
BNIP3L	1.64835	0.00595823	1.0015	0.196997	0.00781476
FRYL	0.554687	0.00128105	0.994331	0.00581982	0.00155522
NMI	0.675233	0.028784	0.998244	0.0582552	0.0194282
RARRES1	1.33093	0.107938	1.00067	0.0126211	0.0312005
NECAP2	0.589853	0.00378513	0.998238	0.306992	0.00455466
ALG8	0.652447	0.016788	0.998046	0.204544	0.0256229
RBM38	0.689531	0.0409486	0.997686	0.00351525	0.0321712
SPR	0.678437	0.0294531	0.994719	0.0152085	0.0199829
MAL	1.45568	0.0345845	1.00037	0.0183214	0.0249397
LTBP3	0.678793	0.0314698	0.998601	0.041731	0.0252303
SSH3	0.694291	0.0405455	0.996304	0.0318467	0.032602
TMEM134	0.539032	0.000932974	0.994227	0.000516414	0.000771999
AMZ2	0.655756	0.0190425	0.997247	0.0260778	0.0236168
HSD17B8	0.688492	0.0367016	0.99716	0.0537168	0.0287896
PAICS	0.659651	0.0195058	0.998167	0.128423	0.0200954
ZNF446	0.671391	0.0284884	0.992945	0.0209784	0.0203635
VPS16	0.674195	0.0308118	0.996854	0.0880219	0.019768
RFXANK	0.684806	0.0334218	0.996809	0.000614206	0.0224841
CCHCR1	0.664474	0.021294	0.992939	0.0101041	0.0382544
RPIA	0.647127	0.0164226	0.999832	0.907632	0.0294654
S100A14	0.572902	0.00206702	0.998494	0.0607453	0.00443944
CREB3L1	1.73187	0.00209519	1.00279	0.0117234	0.00278506
SIGIRR	0.65512	0.0182603	0.995719	0.0105918	0.024777
AUP1	0.704577	0.0482616	0.995508	0.0119431	0.031715
COPS5	0.691774	0.0386938	0.999107	0.354029	0.0240874
DDX41	0.671386	0.026544	0.997255	0.0183972	0.0241127
ZNF76	0.553723	0.0011317	0.992889	0.00295793	0.0016139
ING1	1.46629	0.0323271	1.00614	0.00625314	0.0362503
MRPS18B	0.634378	0.0109139	0.997359	0.0416833	0.0136066
NDUFB7	0.639837	0.0137644	0.99862	0.0634651	0.0124233
DVL3	1.397	0.0593342	1.00051	0.648187	0.0410292
SLC22A18	0.714233	0.0618546	0.996405	0.0140386	0.0403115
CDK14	1.5755	0.0122929	1.00123	0.13918	0.0163632
CDKN1C	1.61449	0.00722023	1.00057	0.237054	0.00836775
NAA10	0.663643	0.0214238	0.997405	0.0467503	0.0199886
FNBP4	0.645385	0.0141551	0.997071	0.0351309	0.00927567
LRIG1	0.666419	0.0241169	0.998743	0.0953199	0.0169121
BAZ2A	0.690071	0.0395339	0.995567	0.293669	0.0293595
ISOC2	0.670667	0.0261894	0.997662	0.178067	0.0442104
PCBD1	0.63811	0.0123083	0.99781	0.0940481	0.0194762
ABCF3	0.700635	0.0471396	0.991036	0.0015734	0.0338517
ATP6V0E2	0.647653	0.0148224	0.996763	0.00591714	0.01445
THEM6	0.721846	0.0673507	0.997431	0.060531	0.0441327
TXN2	0.675237	0.0301209	0.997436	0.221727	0.0201366
CACNB3	1.54924	0.014313	1.00395	0.105919	0.0164505
UBL4A	0.682682	0.032918	0.998395	0.364212	0.0283625
CD320	0.680095	0.0302851	0.997546	0.240372	0.0228454
UVRAG	0.667987	0.0244776	0.993505	0.000332432	0.020656
CMC4	0.666645	0.0228583	0.999051	0.372602	0.0179257
CCS	0.626187	0.0097147	0.995159	0.0125544	0.00542786
SLC25A14	0.586103	0.002966	0.994221	0.0622129	0.00158648
PCCB	0.612804	0.00669606	0.999115	0.326377	0.00378681
INPP5A	1.46026	0.0328975	1.00308	0.0207097	0.031957
C2	0.596664	0.00417825	0.996563	0.00900257	0.00283266
RARG	0.714983	0.0589151	0.997902	0.49282	0.0461218
MPG	0.608649	0.0057545	0.996925	0.0477068	0.00671946
ATG2A	0.636208	0.0124992	0.99312	0.00117338	0.0194348
OCA2	1.39528	0.0664886	1.00461	0.0493889	0.047948
MBNL2	1.53612	0.0164426	1.00217	0.0533037	0.0111801
CILP	1.79231	0.00130101	1.0028	0.000687745	0.00156618
SLC25A1	0.719329	0.0646492	0.998731	0.24432	0.0469164
SCPEP1	1.61793	0.00710016	1.00097	0.130699	0.0090262
FAM193B	0.690586	0.0390154	0.996499	0.0371633	0.0257286
CLCN3	1.5305	0.0168832	1.00274	0.191655	0.00628512
MTSS1	1.43938	0.0417998	1.00197	0.0356167	0.0254196
CDH11	1.42764	0.0451241	1.00148	0.0022861	0.0420277
KLK7	0.64174	0.0127859	0.99981	0.579439	0.0087699
LRP6	1.6325	0.00646298	1.00447	0.0959658	0.00731827
RCC1	0.662865	0.0228341	0.99711	0.165506	0.013937
TCIRG1	0.678137	0.0333638	0.996395	0.0007623	0.0259391
EFEMP1	1.46326	0.0322226	1.00066	0.0302011	0.0383104
NLRX1	0.695116	0.0405556	0.991446	0.020498	0.0413017
ELF1	1.49959	0.0248791	1.00391	0.14199	0.0185567
RXRB	0.5441	0.00136382	0.991842	0.00514985	0.00177866
OLFML2A	1.57105	0.0113824	1.00325	0.00888824	0.0165799
PRKACB	1.43567	0.0422872	1.00262	0.0450368	0.0342177
HOOK2	0.615877	0.00651844	0.996497	0.00128267	0.0116674
ZNF783	0.675505	0.0272833	0.992556	0.00392521	0.0171012
MUS81	0.61223	0.00636041	0.994163	0.0623745	0.00460839
PES1	0.619101	0.0089417	0.99585	0.0757588	0.0111787
UNC45A	0.592125	0.0041646	0.990439	6.91388e-05	0.00256498
AP3B1	1.62689	0.0068784	1.00483	0.0420355	0.00946266
SRC	1.47816	0.0283966	1.00701	0.0136387	0.00918379
TUSC2	0.635622	0.012988	0.996926	0.0837872	0.0365461
POLD4	0.687022	0.0369685	0.994769	0.0199707	0.0253644
ABCC10	0.70785	0.0509661	0.993823	0.0470233	0.0499405
DOCK1	1.80522	0.00154542	1.00626	0.00831812	0.00138995
GTPBP2	0.583564	0.0029856	0.991562	0.00177127	0.00241051
MTX2	0.671449	0.0260451	0.997345	0.0247801	0.0221654
MID2	1.59313	0.0115322	1.00406	0.0190753	0.0138741
LUZP1	1.53239	0.0161347	1.00637	0.0178868	0.0237558
ALKBH1	1.4809	0.0284643	1.00376	0.12331	0.0257211
HSF1	0.567733	0.00180924	0.995482	0.00100732	0.000906145
ENAH	1.47129	0.0298036	1.00022	0.836959	0.0359996
MRPL34	0.71547	0.0609162	0.997922	0.0618332	0.0428157
SLC41A3	1.45469	0.0357717	1.00372	0.119636	0.0467439
ZDHHC24	0.518709	0.000349408	0.992722	0.00376612	0.00037084
C2CD5	0.601442	0.0046786	0.997111	0.141486	0.00262922
GMPR	0.580786	0.00240328	0.996639	0.000279833	0.00171444
TPP2	1.51177	0.0199334	1.00305	0.21676	0.0240687
ST3GAL5	1.58663	0.0100316	1.00517	0.0398896	0.00948965
LAMTOR3	0.70244	0.048909	0.999274	0.440785	0.0400286
ZNF747	1.51437	0.024575	1.0079	0.00168709	0.0306707
PSMC4	1.36773	0.0830501	0.999957	0.943317	0.0343608
ACO1	1.51494	0.0215215	1.00603	0.0266226	0.0259431
OXLD1	0.605053	0.00545104	0.993616	0.00124276	0.005673
KEAP1	0.68011	0.0305626	0.993399	0.00017541	0.0237452
NEU1	0.699467	0.0454964	0.998262	0.0801557	0.0302711
ITGB4	0.690224	0.041986	0.996956	0.000921349	0.0260161
SNRPA1	0.635439	0.0112654	0.998048	0.22509	0.0065657
NGLY1	0.671628	0.026009	0.993128	0.00472818	0.0163627
SVEP1	1.67521	0.00413928	1.00488	0.00014469	0.00295214
ACAA1	0.624554	0.00844797	0.989869	0.000258575	0.00497674
WDR45	0.656308	0.0193798	0.995704	0.00499052	0.0119337
SUGP2	0.641988	0.0135747	0.99485	0.00954137	0.0216139
QTRT1	0.629729	0.00940299	0.994213	0.0022996	0.00710047
BYSL	0.660886	0.0203612	0.988992	0.00319509	0.0252085
SIL1	0.615486	0.00810233	0.996819	0.0702957	0.00843277
AVPI1	1.87339	0.000668097	1.00213	0.011321	0.00050299
HTRA2	0.57198	0.00210694	0.996735	0.177255	0.00230684
PTP4A3	0.634132	0.0107929	0.996518	0.00580291	0.0060612
FARSA	0.581591	0.00287541	0.99169	0.000283717	0.0019973
DEFB1	0.63942	0.0127655	0.999842	0.376876	0.00805573
CMTR1	0.715195	0.0636778	0.992874	0.000939295	0.0414608
MAGEF1	0.622462	0.0095444	0.994521	0.0139988	0.00793841
APEX2	0.672963	0.0276854	0.990486	0.00380017	0.0211305
ESRRA	0.674421	0.0282072	0.994709	0.14799	0.0198864
CAV1	1.63952	0.00551371	1.00088	0.0274893	0.000709635
NOL9	1.55408	0.0133666	1.0008	0.747778	0.0206654
CYB5R1	0.652452	0.0162005	0.996303	0.0210033	0.0178358
B3GAT3	0.694545	0.0455875	0.992262	0.00496719	0.0317243
TBC1D13	1.54082	0.015716	1.00932	0.0053132	0.0222968
EDEM1	1.45729	0.0334815	1.00317	0.3405	0.0348211
TERF2	1.64745	0.00599519	1.00384	0.0972484	0.00338861
AKAP8	0.577218	0.00336258	0.994834	0.0636374	0.00222967
TRMT12	0.622405	0.00818688	0.992424	0.00169653	0.00513162
MTIF2	0.556707	0.00133338	0.994655	0.00540944	0.000821577
RPS6KB2	0.647308	0.0168988	0.993686	0.0152301	0.014776
NPEPPS	1.43522	0.0414548	1.00294	0.148918	0.0282521
PLA2G2A	1.60966	0.00886166	1.00014	0.585906	0.0105048
RXRA	1.55723	0.0126736	1.00423	0.0343722	0.0160051
IPO13	0.632811	0.0117895	0.996303	0.347414	0.0208502
MCM5	0.627696	0.0102422	0.996338	0.00870008	0.0131169
UPF1	0.617155	0.00806588	0.994462	0.000641788	0.00662681
PSMB10	0.669413	0.0248161	0.998115	0.060026	0.0167862
SAFB	0.694437	0.0424542	0.994582	0.00723534	0.0280569
NAT9	0.613976	0.00752241	0.989912	0.00211992	0.013604
CLDN10	0.700717	0.0465895	0.999047	0.182138	0.0384796
DPH2	0.626099	0.00932357	0.999582	0.905245	0.0102551
TSPAN32	1.50951	0.0218219	1.00465	0.0579125	0.0328159
HOXC11	1.51342	0.022132	1.00552	0.0270652	0.0329652
PTPN1	1.69065	0.0033415	1.00909	0.00373527	0.00504565
MUC5AC	1.47093	0.0355107	1.00403	0.00740038	0.037002
LRRC61	0.70756	0.0554786	0.993329	0.0272861	0.0406722
CDK19	1.47617	0.0285788	1.00579	0.091669	0.0333739
CCSER2	1.50544	0.0231786	1.00635	0.00435277	0.0347096
ARFGEF1	0.696055	0.043575	0.99683	0.0652216	0.0298796
GPKOW	0.709122	0.0536559	0.995358	0.029675	0.0365879
PMS2P3	0.587031	0.00300768	0.995426	0.0569434	0.00307072
EMC6	0.723917	0.0707434	0.997609	0.302356	0.0478315
TBC1D8	0.641515	0.0134064	0.996204	0.0315677	0.0160055
PMPCA	0.653424	0.0194435	0.996422	0.150146	0.0412777
MAFG	0.643641	0.0154842	0.994396	0.133213	0.0179935
GAS7	1.47818	0.0288795	1.00606	0.0299009	0.0113129
POLR1C	0.612824	0.00627631	0.993049	0.00776354	0.00343956
HOXC6	1.75947	0.00172341	1.00363	0.000390565	0.000548274
GSTM3	1.43242	0.0441839	1.00103	0.101193	0.0466156
STAT5B	1.52478	0.0180589	1.00529	0.00379083	0.0130949
TRMT1	0.694446	0.0407986	0.994368	0.000174586	0.0280387
EPHA1	0.710169	0.0529993	0.997947	0.307225	0.0406713
CHST15	1.43269	0.0437623	1.00563	0.000622372	0.0495614
ITM2A	1.34487	0.0973927	1.00242	0.0124885	0.0360218
OCEL1	0.567484	0.00153909	0.990438	0.00121666	0.00108146
NOP14	0.566394	0.00202238	0.991602	0.00232738	0.00116596
RAI2	0.707212	0.0544501	0.996706	0.0173572	0.040741
ALDH3B1	0.707642	0.0527064	0.996153	0.12044	0.0476424
TEX264	0.602526	0.00651277	0.993424	0.000422915	0.00599205
CREBBP	1.47233	0.0301423	1.00187	0.224731	0.0403054
MRTO4	0.670755	0.0265902	0.997333	0.266677	0.0204903
GTPBP6	0.593786	0.00483609	0.994097	0.0127493	0.00354836
GSTM5	1.61733	0.0083819	1.00128	0.00873864	0.00758694
KRT5	1.44469	0.0406933	1.00116	0.0920965	0.0314508
DRAP1	0.58228	0.00379923	0.992458	0.000706745	0.00207321
IP6K2	0.596596	0.00508019	0.993224	0.0236143	0.00592048
CHST3	1.56058	0.0137261	1.00818	0.00074897	0.0201688
PGS1	0.634946	0.0129822	0.992216	0.00390363	0.0077839
APOD	1.88915	0.00042301	1.00097	0.0126672	0.000146405
ZCCHC24	1.63474	0.00566403	1.00305	0.00277989	0.00632879
GPS1	0.695012	0.0430925	0.99496	0.00364688	0.0428056
ABT1	0.619167	0.00760239	0.993326	0.0106161	0.00671456
MFSD10	0.575674	0.0030235	0.995	0.000246557	0.00203688
EYA2	0.642459	0.0134144	0.999587	0.610111	0.0222561
PUS7	0.697083	0.042477	0.996718	0.0793954	0.0389806
MMP9	0.69634	0.0428139	0.998705	0.0699495	0.0439878
ACOT13	0.599772	0.00436611	0.996179	0.00854049	0.0048737
LY86	1.43885	0.0423636	1.00409	0.101583	0.0171106
DENND2D	0.540234	0.000675598	0.991548	7.21524e-05	0.000507734
ACP5	0.681714	0.0335258	0.996451	0.017405	0.0245161
MAP4K1	0.610343	0.00585635	0.9991	0.436939	0.0161503
NR4A3	1.46303	0.0335284	1.00045	0.148524	0.0350864
PAM16	0.648247	0.0176494	0.997595	0.11692	0.0108006
TMEM47	1.46074	0.0339682	1.00078	0.149318	0.0492409
STXBP2	0.584335	0.00309768	0.995678	0.00960923	0.00177445
CPE	1.5229	0.0187107	1.00144	0.147252	0.0267316
CDKN1B	1.46486	0.0311326	1.00204	0.0881744	0.0434639
VTCN1	0.718165	0.0617201	0.999659	0.576912	0.0440376
TYW1	1.64523	0.00669435	1.00771	0.0169104	0.0106828
OAS1	0.710263	0.0538356	0.997569	0.079159	0.0405577
DHX16	0.675839	0.0295172	0.991597	0.000400085	0.026448
TRMT2A	0.496426	0.000120135	0.983799	0.00108048	4.57472e-05
MPP2	1.66235	0.00507085	1.00618	0.0611375	0.0070032
CWF19L1	1.58745	0.0106107	1.01275	0.00131416	0.0114725
MTMR9	1.51481	0.0198516	1.00751	0.00279608	0.00680782
XDH	1.46564	0.0340727	1.00636	0.0146325	0.0455338
RGS5	1.93979	0.000545917	1.00113	0.0467267	0.000610008
SMARCD3	0.501152	0.000173772	0.99799	0.0882981	7.738e-05
BMP4	1.54588	0.0149789	1.0107	0.000431777	0.0114802
KLF7	1.44862	0.0409069	1.00957	0.000770785	0.0379805
PHKG2	0.590361	0.00358361	0.986966	0.000577996	0.00185033
ELF2	1.54051	0.0162225	1.00078	0.744465	0.0245452
TAB2	1.53579	0.0166242	1.00584	0.0594366	0.0185896
SEMA4F	1.48383	0.02736	1.00989	0.0022992	0.0398281
RECQL5	0.682623	0.0320726	0.993046	0.0420464	0.0428787
WDR3	0.698197	0.0433436	0.996722	0.100572	0.0432352
STOML1	1.4466	0.0380944	1.004	0.464359	0.049596
KIZ	1.30892	0.127792	1.00535	0.00741256	0.0350737
SLC12A9	0.667917	0.0245599	0.991595	0.0125105	0.018617
TXNRD2	0.706142	0.049777	0.993262	0.0290387	0.0436095
PHKA2	0.704376	0.0516274	0.9927	0.0147869	0.0486716
CCNL2	0.666512	0.0232315	0.998892	0.41566	0.0407253
COPZ2	1.47027	0.0291924	1.00513	0.0221187	0.043434
OVOL2	0.694676	0.0401481	0.995412	0.0520782	0.0472926
RAB17	0.721346	0.0661422	0.993949	0.00603111	0.0444794
SEMA3C	1.59857	0.00847712	1.00166	0.0431443	0.00708812
TDP2	0.633615	0.0116046	0.997673	0.0548142	0.0144801
ATR	0.561098	0.00171665	0.995368	0.0159036	0.000795463
SOX9	0.641786	0.0132777	0.997617	0.0535987	0.00844952
FADD	0.65367	0.0172677	0.99438	0.0612065	0.0106529
EIF2B5	0.636395	0.0140566	0.990456	0.0074007	0.0209012
NUP85	0.700831	0.0470709	0.99403	0.000547889	0.0464595
DUSP14	1.47063	0.0295993	1.00374	0.193708	0.0266159
PTPN6	0.640142	0.0144392	0.989638	4.91882e-05	0.00842281
F13A1	1.69219	0.00370414	1.00193	0.0865977	0.00287111
GLI3	1.60355	0.009005	1.00652	0.0141726	0.0125949
MKKS	0.680927	0.0339174	0.998417	0.504934	0.0344231
BNC2	1.65096	0.00518338	1.00772	0.000153868	0.00701625
BEX1	1.59378	0.00933867	1.00028	0.481997	0.00662002
CDK13	1.68644	0.00418633	1.00449	0.0738788	0.00432782
RANBP2	1.92108	0.000369371	1.01079	0.000218314	0.000580768
UBE2O	0.658692	0.0193857	0.997281	0.420344	0.0132213
CELF2	1.58859	0.00921688	1.00162	0.23108	0.00906635
RNASEH2A	0.657414	0.0189001	0.99653	0.0512211	0.0132166
ZNF467	0.60699	0.0054208	0.993176	0.0015394	0.00329491
ARMC6	0.576748	0.0024808	0.989953	0.00300256	0.00222314
SMG5	0.676355	0.0297082	0.993264	0.0149749	0.031638
PMVK	0.65045	0.0166824	0.9948	0.00699487	0.0290001
WDR91	0.567783	0.00164718	0.992661	0.00291883	0.00159321
NFYB	1.42616	0.0490373	1.00265	0.268741	0.0437317
SETX	1.59493	0.00854842	1.00387	0.22818	0.0120593
MYO1B	1.77783	0.00161476	1.00627	0.013734	0.00161028
MUTYH	0.665767	0.0223626	0.99614	0.254035	0.0265336
CCNH	1.49344	0.0253594	1.0035	0.0621695	0.0328977
TGFB1I1	1.57873	0.0103814	1.00286	0.000168701	0.0140502
DCP2	1.53713	0.0154442	1.00439	0.0763567	0.0189761
PDGFRA	1.47138	0.0292342	1.00109	0.00440041	0.0184662
SDC2	1.48145	0.0302612	1.00147	0.070814	0.0413869
MED8	0.686259	0.0355132	0.999422	0.803942	0.0284024
GRPEL1	0.662664	0.0213067	0.994372	0.0544277	0.0314489
DCLRE1C	0.722915	0.0702052	0.997414	0.164218	0.0471023
PADI2	1.52762	0.0189633	1.00675	0.0120279	0.0128357
GMNN	0.668781	0.0239297	0.998451	0.148048	0.018908
DHCR7	0.58879	0.00318422	0.994632	0.0136164	0.00547004
ATP13A1	0.711197	0.0554689	0.992076	0.000492699	0.0375661
HMHA1	0.695798	0.0445237	0.993461	0.0296652	0.0321212
EFHD1	1.575	0.0124145	1.00463	0.00396276	0.0127095
IKBKB	0.692562	0.0413291	0.994831	0.0176869	0.0295457
RAPGEF3	0.616745	0.00828971	0.998685	0.230515	0.0116345
SFRP1	1.69507	0.00357493	1.00018	0.548908	0.00554319
DAXX	0.640539	0.0140081	0.990354	0.010037	0.0231759
EFHD2	0.560462	0.001384	0.99535	0.0534245	0.000723428
SNN	1.44381	0.0385259	1.00038	0.732226	0.0312524
2023-09-08	1.54278	0.0144212	1.00339	0.116656	0.0129102
RBBP6	0.704307	0.0503262	0.997257	0.212118	0.0386914
BTRC	1.5283	0.017609	1.00847	0.0086751	0.012973
DNAJC16	1.41266	0.0535798	1.00278	0.302324	0.0499508
PPFIBP1	1.49979	0.0245661	1.00504	0.0143523	0.0327205
LPAR2	0.528964	0.000512602	0.987702	0.000132212	0.00071519
GJB1	0.695875	0.0411427	0.994575	0.0577622	0.0265523
CD38	0.696852	0.0411818	0.995675	0.134855	0.0260982
NFKBIE	0.632427	0.010217	0.992099	0.0314084	0.00760435
BAK1	0.677484	0.0293977	0.996054	0.179598	0.0219529
MMP19	1.56818	0.0121731	1.0044	0.0314385	0.00362446
CTSO	1.52758	0.0177673	1.00362	0.0591686	0.017322
TRIM24	0.600461	0.00541198	0.9992	0.710822	0.00931639
ISCA1	0.684062	0.0334091	0.996587	0.103261	0.0237635
LRFN4	0.674943	0.0276694	0.991364	0.000354969	0.0188925
RNF8	0.544931	0.000954549	0.988184	0.00113681	0.00178832
ANAPC2	0.708153	0.0557572	0.995172	0.0888251	0.0366773
PCYT2	0.658194	0.0225614	0.995817	0.0572596	0.014808
HPN	0.682169	0.0312426	0.995128	0.0128219	0.0495264
PLIN1	1.48236	0.0277443	1.00092	0.272674	0.040508
PLEK2	1.67324	0.00465254	1.01221	0.00954642	0.00564314
CNPY3	0.663973	0.0235101	0.992151	0.00261397	0.0171481
MPP3	1.49682	0.0238156	1.00659	0.0773629	0.0242968
SMAGP	1.81842	0.000898771	1.00336	0.116669	0.0012386
SIN3B	0.672458	0.0271192	0.992221	0.00975576	0.0170258
MOGS	0.700706	0.0480628	0.989817	0.00254079	0.0374954
ASAP3	1.54352	0.0180478	1.00813	0.060011	0.0246555
SGCD	1.57761	0.011851	1.00848	0.0305604	0.0151511
MAP1A	1.74017	0.00227138	1.00705	0.0108989	0.00208503
RFNG	0.54333	0.00112	0.991816	0.0169488	0.000533779
SLC1A3	0.693055	0.0399712	0.995118	0.0210715	0.0309835
TAOK2	0.683493	0.0342389	0.991475	0.064826	0.0329761
TPRA1	0.659368	0.0243374	0.991374	0.00268862	0.0158922
MAOA	2.51348	1.78304e-06	1.00764	2.51617e-05	3.99356e-07
GNG4	1.51092	0.022062	1.00485	0.0388023	0.0298643
PAQR4	0.666667	0.0219735	0.992793	0.0326561	0.0216365
APOL2	0.663757	0.0219984	0.996132	0.0468878	0.0142244
GTF2F1	1.44327	0.0393656	1.00688	0.131929	0.0350697
FJX1	0.642306	0.0132808	0.994219	0.0625273	0.0203647
SGSM3	0.686994	0.0369017	0.984468	0.00251661	0.0377227
MSRA	1.66554	0.00463182	1.00651	0.111434	0.0060398
RRP9	0.543754	0.000939581	0.985048	0.00016043	0.000410602
RAB22A	1.46405	0.0322913	0.999498	0.789522	0.0396456
DIS3	1.71229	0.00289271	1.01055	0.00668999	0.00350286
TSPYL4	1.42538	0.0454583	1.00145	0.46474	0.0353636
SNAP29	0.664041	0.0214397	0.995478	0.139008	0.0175727
TFPT	0.642128	0.015084	0.997829	0.345333	0.0127359
UNC93B1	0.535691	0.000548559	0.989301	0.00109419	0.000595128
SIRT5	0.687494	0.0352046	0.993111	0.0029874	0.0324931
RABGAP1L	1.3561	0.0924784	1.0063	0.045485	0.0431224
DCHS1	1.59652	0.00832228	1.00656	6.52415e-05	0.010814
RRP7A	0.681588	0.031692	0.995097	0.139448	0.0456731
BCL7A	1.5089	0.0218844	1.00966	0.00791174	0.0270903
HSPB6	1.55507	0.0172776	1.0023	0.00500129	0.01435
CAMK1G	1.38731	0.0713483	1.00978	0.00971442	0.0459019
SRPK1	0.609884	0.0054357	0.99632	0.0951675	0.00475018
ZNF264	1.53003	0.0174724	1.00707	0.00318446	0.02634
UIMC1	0.696223	0.042225	0.987114	0.00643977	0.0280363
IRF7	0.660541	0.0204426	0.997767	0.0836345	0.0140689
PCK2	0.50413	0.000199188	0.987882	0.000591207	7.40233e-05
CDCP1	0.723047	0.0688503	0.995266	0.0643766	0.0473484
CST8	1.56682	0.0131004	1.00746	0.02183	0.020412
AHI1	1.46837	0.0313079	0.999899	0.956052	0.0403423
FBXO38	1.55001	0.0138345	1.00348	0.224504	0.0118619
SGCB	0.677514	0.029514	0.997501	0.253903	0.0212011
ZNF106	1.48736	0.0251527	1.00335	0.229176	0.00797195
ANKZF1	0.669254	0.0237721	0.991887	0.00448903	0.0156074
CUL9	0.580012	0.00275317	0.98528	4.87968e-05	0.00145595
TRPC4AP	0.708843	0.0556283	0.987371	0.00921392	0.0435704
CORO2A	0.642275	0.0129241	0.987298	0.0284675	0.0149587
SUPT7L	0.711625	0.0545273	0.993634	0.141723	0.0364599
BCAT2	0.636289	0.0116188	0.985467	0.00182519	0.0139901
SLC1A4	1.90545	0.000494571	1.0074	0.0494252	0.00079809
RASL11B	1.5286	0.0209887	1.00136	0.234261	0.0277114
ID2	1.49423	0.0239997	1.00142	0.0458265	0.00905834
GINS2	0.694599	0.0397203	0.998271	0.337755	0.0355086
GREB1L	1.52096	0.0249828	1.00961	0.00906887	0.0326372
SLC33A1	0.648803	0.0182361	0.996594	0.0451296	0.0121028
ADO	1.6433	0.0055488	1.00412	0.156045	0.00480431
HSPB7	1.69481	0.00354371	1.00386	0.00404575	0.00548733
TESK1	0.657617	0.0211266	0.993052	0.0197985	0.0269298
MAPRE2	1.77178	0.00160119	1.01356	8.18917e-05	0.00228016
GLIPR1	1.46241	0.0363931	1.0107	0.000374281	0.0452426
PCYT1A	1.54331	0.016998	1.0215	0.000126052	0.0165106
TBC1D4	1.444	0.0410814	1.0164	8.35486e-05	0.0126864
DPAGT1	0.626975	0.0100129	0.994506	0.0597035	0.00941639
FANCA	0.690923	0.0373652	0.996313	0.43447	0.0426367
LBP	1.69301	0.0045174	1.0084	0.00690728	0.0073239
SLC2A3	1.42838	0.0468237	1.00302	0.0520296	0.0320632
SAFB2	0.681034	0.032176	0.995448	0.0709158	0.0493712
GNG11	1.5895	0.00940902	1.00219	0.0166707	0.0109767
ENDOG	0.687478	0.0381224	0.995942	0.119673	0.0274466
POGK	1.36211	0.0804345	1.00035	0.879569	0.0357663
THBD	1.72795	0.00275389	1.01129	0.0137679	0.00344903
FXYD1	1.63751	0.0058146	1.00169	0.00379761	0.00286479
WDR46	0.640412	0.0127218	0.991122	0.0137173	0.0345548
CA14	1.46553	0.036629	1.00935	0.00578073	0.0219324
LETM1	0.681988	0.036618	0.993978	0.0158947	0.0303285
NCAPG2	0.698316	0.0431326	0.989762	0.0136616	0.0446104
EVPL	0.595931	0.00432802	0.993422	0.048685	0.0026006
TAF1D	0.55147	0.00150032	0.995763	0.0128158	0.00157904
RNF115	1.43446	0.0443395	1.00485	0.0528788	0.0330793
AKAP11	1.45879	0.033068	1.00291	0.160746	0.0434311
TDRD7	0.699928	0.0452866	0.997755	0.194856	0.0333431
PRPH2	1.53107	0.0193247	1.0087	0.0626977	0.0278189
PIK3C3	1.60765	0.00984184	1.00755	0.018	0.0100851
SIPA1	0.633478	0.0115514	0.986812	0.000529916	0.0083025
GMIP	0.680396	0.0370401	0.984913	0.00051195	0.0284126
TOMM40	0.710601	0.0589496	0.997677	0.364785	0.0443914
C7	1.39552	0.0631675	1.00124	0.00879235	0.0206734
SIGMAR1	0.657816	0.0196844	0.991	0.0205501	0.0121038
POLE2	1.48236	0.0288481	1.00352	0.346381	0.0216519
MFAP4	1.51201	0.0196378	1.00134	0.0415708	0.00987176
LYVE1	1.47859	0.0346702	1.00393	0.0325834	0.0452071
UBE2K	0.685196	0.0347767	0.993979	0.0156731	0.022296
FILIP1L	1.48899	0.0244711	1.0015	0.0100072	0.0253671
GLE1	1.48326	0.0293347	1.0067	0.0780921	0.038723
PAMR1	1.43752	0.0420675	1.0043	0.0142411	0.0376255
PCDH1	0.601205	0.00562976	0.990947	0.007209	0.00402839
PDGFD	1.72615	0.00214075	1.00109	0.197191	0.00305694
MAS1	1.53254	0.018921	1.01004	0.00621586	0.0228493
RNF121	0.552787	0.0012803	0.980452	0.00189571	0.00360919
MAPK10	1.62576	0.00790931	1.0157	2.37025e-05	0.00354009
GTF3C4	1.38436	0.068568	1.01498	0.00761393	0.0145092
TFCP2L1	1.45779	0.0364165	1.00805	0.0139818	0.0338365
GRK5	1.52457	0.0194371	1.00796	0.0362626	0.00703612
LMOD1	1.72264	0.00256782	1.0011	0.00207823	0.00338513
CBS	0.660621	0.0199501	0.996437	0.0218535	0.0364499
MAP7D3	1.47252	0.0322709	1.01	0.0420131	0.0459147
TRAF2	0.676375	0.0302381	0.988715	0.0172132	0.0225014
ICAM3	0.610361	0.00598717	0.993847	0.00671542	0.00698606
FBXO17	1.53594	0.0167875	0.999915	0.876776	0.0165607
HTATSF1	0.683944	0.0341832	0.995421	0.0989463	0.0234306
TWF2	0.611199	0.00828445	0.983128	0.000149826	0.00747475
AKT3	1.8019	0.0010659	1.01244	3.27235e-06	0.00143374
SENP2	1.56442	0.0133398	1.00662	0.132962	0.0195765
TYRO3	1.59023	0.00955157	1.00848	0.000829415	0.00671456
SLC35A2	0.655267	0.018226	0.994574	0.024341	0.0167058
COL7A1	0.680531	0.0301278	0.999139	0.869848	0.0388511
PDS5B	1.57856	0.0113845	1.00452	0.0717098	0.0132961
FNDC3A	1.41905	0.0483482	1.00344	0.139818	0.0312529
GCDH	0.661658	0.0221481	0.988865	0.000382493	0.0160087
KIF5A	1.46037	0.0358273	1.00696	0.00901856	0.02064
TTC4	0.693799	0.0397417	0.983285	0.0215369	0.0259322
AKIRIN1	1.37739	0.0757362	1.00272	0.0559964	0.0483178
ZNF142	1.47241	0.0322016	1.00513	0.331121	0.0395553
CROCCP2	0.718144	0.065829	0.996499	0.189109	0.0450481
PEX26	0.576073	0.00248159	0.988453	0.0158048	0.00200899
SLC27A5	0.630878	0.0107661	0.994256	0.216883	0.0193636
MLLT11	1.53854	0.0153841	1.00348	0.00656443	0.0174085
B9D1	0.568847	0.00171066	0.988004	0.0122687	0.0029275
KIF3C	1.49669	0.025642	1.01112	0.0236428	0.0294623
ECM2	1.77152	0.00138876	1.00129	0.110753	0.00139457
REEP1	1.82867	0.0010466	1.0029	0.0794267	0.00160678
DLC1	1.72069	0.00267112	1.00259	0.00321743	0.00181293
KCTD17	0.669828	0.0260737	0.99157	0.0969343	0.0355633
RECQL4	0.633543	0.0113254	0.991469	0.00448749	0.00656431
CDK18	0.625496	0.0088434	0.985059	0.000403546	0.00971262
GCC2	1.61015	0.00737065	1.0015	0.541959	0.0093943
RHBDD3	0.622508	0.00836181	0.984326	0.00255378	0.00812432
LHX3	1.33411	0.112836	1.01319	0.00326585	0.0458778
DCAF7	0.644479	0.0158	0.987213	0.00883224	0.0280136
POLD1	0.679057	0.0299949	0.988688	0.0254121	0.0289285
FADS3	0.663447	0.0216175	0.991125	0.0101212	0.0275922
CNOT4	0.701057	0.0501396	0.99563	0.277798	0.0369968
OR1D2	1.44595	0.0406622	1.00648	0.0755907	0.0317169
SLC16A2	1.56899	0.0144887	1.01436	0.00226695	0.00963675
PANK4	0.666818	0.0234613	0.995639	0.274321	0.0155915
MAP3K5	1.4898	0.0247316	1.00951	0.000138716	0.0371201
IHH	1.8064	0.00177292	1.01267	0.0180967	0.00275986
PHKG1	1.47646	0.0283995	1.0069	0.273349	0.0111337
TSC22D4	0.649915	0.0161072	0.989417	0.0274455	0.0100729
NADSYN1	0.446084	2.68125e-05	0.986565	1.45592e-05	7.30441e-06
SFI1	0.614224	0.0067188	0.990483	0.0609137	0.00826378
KRI1	0.648402	0.014946	0.986705	0.000724456	0.0185375
TRIM14	0.562598	0.00160218	0.993061	0.00421511	0.00152706
DGAT1	0.694151	0.0398571	0.995598	0.0124427	0.029985
PSRC1	0.673089	0.0265021	0.995471	0.124053	0.0170358
BLMH	1.55243	0.0136356	1.00973	0.0197524	0.0153267
ZC4H2	1.40988	0.0569317	1.01228	0.00780666	0.0359594
KCNMB1	1.5197	0.0207223	1.0032	0.00162456	0.0181833
GFPT2	1.69886	0.00323516	1.00898	2.02006e-05	0.00513428
APH1B	1.34198	0.10304	1.00908	0.0514062	0.0412047
PRKAR2B	1.41022	0.0539802	1.00241	0.0390554	0.0407038
RIN1	0.685984	0.0354102	0.9906	0.0470402	0.0388275
PCDH17	1.38096	0.069263	1.00554	0.00289468	0.0483644
DNMBP	1.75996	0.00195109	1.01658	0.000765906	0.00166319
TRABD	0.622932	0.00915458	0.988308	0.0416306	0.0251124
SMAD6	0.717637	0.0682995	0.990311	0.00675933	0.0488269
FAM90A1	0.690461	0.0373126	0.98902	0.0643084	0.0338479
UNG	0.630879	0.00951904	0.997782	0.451987	0.0102216
HDHD3	0.652183	0.017332	0.98472	0.00133942	0.0144924
TFAM	0.618614	0.00794731	0.995168	0.289926	0.0105217
TACC3	0.62957	0.0120543	0.99432	0.0103283	0.0225285
LHX6	1.44801	0.0383117	1.01185	0.0204315	0.0333339
RARB	1.55594	0.01378	1.01867	0.000168697	0.0158951
HTATIP2	0.667318	0.0234032	0.992899	0.0621841	0.0434257
TCF7L1	1.62032	0.00678012	1.00369	0.0710511	0.00948027
APBB2	1.52806	0.0177134	1.01062	0.014299	0.0108588
B4GALT4	0.622052	0.00846245	0.97908	0.00929339	0.00763573
EXD2	1.66627	0.00505412	1.01656	0.000575699	0.00283754
FAN1	0.648394	0.0162395	0.994067	0.265967	0.0200271
ACKR1	1.49301	0.0236903	1.00182	0.00744176	0.0309579
FEZ1	1.94099	0.000317193	1.00533	0.0084234	0.000259147
TMEM131	1.6293	0.00617878	1.007	0.0837822	0.00570189
GMPPA	0.678174	0.0337431	0.989821	0.0100833	0.0267471
TAS2R1	1.42784	0.0476853	1.00539	0.102672	0.0452861
SLC35C1	0.563654	0.00128934	0.972747	0.000599704	0.00218075
CLK4	0.710286	0.0602134	0.997184	0.282632	0.0470697
MED9	0.614258	0.00729373	0.98664	0.0864662	0.0038842
GNA14	1.50474	0.025577	1.01534	0.000413839	0.00934594
JAM2	1.85701	0.000580841	1.00113	0.297212	0.000930062
ICT1	0.608951	0.00592505	0.994568	0.0260042	0.00486689
PIK3R1	1.60572	0.00758798	1.0066	9.86526e-05	0.00767512
ATF7IP2	0.631071	0.0104206	0.990467	0.133107	0.00725089
KLF9	1.42724	0.0460648	1.00489	0.00340243	0.0483272
SYNM	1.49418	0.0259479	1.00162	0.0340585	0.0195976
LARP6	1.54093	0.0159902	1.00898	0.0055967	0.0158292
TMEM204	1.65856	0.00460087	1.00987	0.000765271	0.00133355
SLC25A46	1.36684	0.077733	0.999416	0.689564	0.0460523
DRD5	1.41817	0.0578187	1.00738	0.0441804	0.0355627
SLIT3	1.52285	0.0192157	1.01269	0.00449594	0.017231
FAM110B	1.61183	0.00761954	0.999898	0.929466	0.00913575
MPZ	1.70689	0.00371931	1.01034	0.0409605	0.00534814
SLCO2A1	1.49064	0.0340094	1.00468	0.025835	0.0414441
CC2D1A	0.613337	0.00764443	0.985422	9.29927e-05	0.0075685
ASPSCR1	0.58345	0.00362397	0.990342	0.00293628	0.00706482
ZXDC	0.634523	0.0111459	0.98444	0.00114439	0.0184215
TULP4	1.51575	0.0199439	0.997345	0.516946	0.02697
IDUA	0.63668	0.0131743	0.991267	0.0109432	0.00781103
ZNF8	1.4544	0.0367824	1.0151	0.0231701	0.0450897
RHBDF2	0.583935	0.00280815	0.986906	0.00157714	0.00589863
PAOX	0.661942	0.020228	0.987608	0.0302887	0.0201083
CALCRL	1.59946	0.0106199	1.01995	0.000234168	0.00863653
KRT23	0.677299	0.0298568	0.997968	0.0681281	0.02095
PIN1	0.701326	0.0470461	0.99485	0.193511	0.0455005
FAM172A	2.01299	0.00010715	1.01251	0.000435949	0.000128789
FAAH	0.540076	0.000849086	0.988337	0.00695564	0.000420475
NAV3	1.69691	0.00339482	1.00661	0.00377266	0.00473647
FAM174B	0.666299	0.0258418	0.990008	0.0419134	0.0179316
LRRC23	1.50248	0.0223527	1.00756	0.151291	0.0320014
TREM1	1.43068	0.0504651	1.01393	0.00637073	0.0401178
CPA3	1.45597	0.0388742	1.01572	0.000528525	0.0446071
KIF1C	0.711182	0.058604	0.989644	0.0145947	0.0479573
LHPP	1.45824	0.0359102	1.01281	0.00573669	0.0236653
CBLB	0.700232	0.0448583	0.997381	0.336875	0.0389757
ITGA10	1.85136	0.000893109	1.01605	0.00350439	0.00137443
TELO2	0.68739	0.0355917	0.987209	0.00554209	0.0263178
ARHGAP5	0.703521	0.0531072	0.998529	0.67882	0.035431
ATG12	1.49626	0.0243444	1.00322	0.207524	0.0191941
UTP20	1.45556	0.036752	1.01231	0.0232104	0.0347857
PITPNM1	0.62578	0.00909858	0.980958	0.000213833	0.00990831
THOC6	0.576194	0.00288484	0.990942	0.0140666	0.00335782
CRYL1	1.50883	0.0232425	1.00436	0.17204	0.0216929
PDE4A	0.700137	0.0445587	0.994663	0.130006	0.0310474
CNTRL	1.46318	0.0351593	1.01335	0.0234807	0.0303202
RPS6KA5	1.37031	0.0767381	1.01992	0.0077341	0.0457718
ADCY2	1.50975	0.0221572	1.01278	0.0017298	0.0128602
HOXA5	1.58942	0.00944954	1.00275	0.0256746	0.0090183
OPLAH	0.584228	0.00277889	0.994551	0.00754183	0.00186331
MCC	1.39687	0.068831	1.01446	0.000680066	0.0251588
AP1G1	1.68473	0.00362206	1.00701	0.22786	0.000300054
GABARAPL1	0.693679	0.0420215	0.996055	0.248261	0.0420977
CHST4	1.37427	0.0810749	1.01033	0.0184177	0.0481023
AP5M1	1.45788	0.03539	1.00302	0.209141	0.0243047
USE1	0.63195	0.0100957	0.988531	0.0239478	0.00933142
RFC5	1.52194	0.0184739	1.00656	0.0538338	0.0220412
TMCO6	0.643673	0.0136715	0.986768	0.00846236	0.00795714
TG	1.53124	0.0232488	1.00811	0.125462	0.0362623
ALDH3B2	0.605936	0.00520382	0.998502	0.450408	0.00771274
SLC17A4	1.65968	0.00676264	1.01068	0.0138545	0.00976578
GATM	1.36855	0.0798043	1.00237	0.0288599	0.0477326
VPS33B	0.703646	0.0520082	0.982741	0.002076	0.0356417
EHBP1L1	0.642339	0.0145496	0.989935	0.0113907	0.0134125
LRRC17	1.82791	0.000864863	1.00032	0.640191	0.00119887
C2CD3	0.584707	0.0033436	0.98776	0.0707126	0.0166853
DDX19A	1.4459	0.037871	1.00794	0.0660523	0.0328695
ZNF451	0.664105	0.0234586	0.996204	0.248071	0.0195102
BBS9	1.85421	0.000627059	1.02963	7.04937e-05	0.00098404
USP18	0.630463	0.00951123	0.993458	0.0129786	0.0102227
ERCC8	1.82692	0.00109075	1.01786	0.000605321	0.00121283
MORN1	0.700278	0.0478527	0.996017	0.261695	0.0332185
LRRK1	0.721011	0.0668759	0.987725	0.0318767	0.0459987
LRRFIP2	0.627712	0.00969432	0.975972	0.00221006	0.00833648
ATP1B2	1.40879	0.0548644	1.00658	0.133069	0.045302
DOK1	0.664643	0.0233299	0.985622	0.00428601	0.0205536
TUBB4A	1.6332	0.00674946	1.01074	0.0133954	0.00989765
PPP1R3C	1.46037	0.0351538	1.00354	0.00419488	0.0389205
F8	1.40957	0.0539612	1.01632	0.000243923	0.0485797
EPS8	1.55516	0.0147838	1.0018	0.110163	0.0220049
PJA2	1.58384	0.0102069	1.00336	0.0820319	0.00303597
SAMD4A	1.83603	0.000773793	1.00665	0.00240753	0.000566383
PACSIN3	0.595979	0.00414401	0.986715	0.00150445	0.00518315
SV2A	1.52009	0.0187229	1.00876	0.0369033	0.0164359
PBX3	2.14554	2.61565e-05	1.00803	0.00012278	1.16216e-05
NEDD4L	0.655532	0.0176418	0.987111	0.00448659	0.0186781
FBXL6	0.530432	0.000516834	0.992886	0.0140402	0.000298498
FOXRED2	1.50641	0.0237262	1.01418	0.0317405	0.0202233
NFX1	0.563847	0.00142394	0.985155	0.0340509	0.00754953
BCL2	1.8118	0.00107756	1.01059	0.0309873	0.000554142
CNNM4	0.682741	0.0321543	0.991113	0.319623	0.0344531
BRF1	0.669392	0.0240587	0.985701	0.0482224	0.0150399
GPR19	1.57439	0.012738	1.00986	0.0268775	0.0153223
GPA33	1.53399	0.0208857	1.01086	0.00638742	0.0266146
SPHK2	0.669148	0.0237307	0.98272	0.052094	0.0196948
GLT8D2	1.52221	0.0177557	1.00764	0.0090725	0.026317
CENPM	0.559696	0.00160292	0.991422	0.0827105	0.00109534
ITGA2B	0.666642	0.0251724	0.996239	0.454396	0.0154969
ANKLE2	0.713357	0.058076	0.990511	0.0281025	0.0379896
DYNC1I1	1.51604	0.0204754	1.01291	0.015829	0.0317885
SIRPB1	1.42545	0.0503946	1.00544	0.109158	0.0354644
RHOBTB3	1.89036	0.000491231	1.0127	2.47569e-07	0.00051685
CYLD	0.616168	0.00793407	0.99217	0.0433426	0.0331341
ZNHIT2	0.65952	0.0193287	0.982134	0.00998552	0.013602
NCOR1	1.37244	0.0752478	1.00311	0.484688	0.0196788
CX3CR1	1.48851	0.0264768	1.00047	0.710747	0.0370306
OLFML1	1.77473	0.00130207	1.00133	0.334326	0.00173325
SPAG9	1.45978	0.0330755	1.01238	0.0160736	0.0197909
KIAA1614	0.709198	0.0532721	0.997073	0.625924	0.0414127
TCAP	0.616236	0.00741045	0.994263	0.267713	0.0105809
MAN1A1	1.51713	0.0186601	1.00108	0.436181	0.0140007
TM4SF4	1.40851	0.0567333	1.00027	0.584266	0.0407211
HPS4	0.687676	0.0397593	0.981308	0.0281252	0.0414284
CLCN2	0.675901	0.0284883	0.983831	0.11152	0.0362895
PLCB3	0.70593	0.0539213	0.98196	0.00159161	0.0370323
NAGLU	0.681099	0.0329762	0.985098	0.0137177	0.0215383
SYN2	1.44111	0.0431962	1.01705	0.0144784	0.0263268
C2orf68	0.612526	0.00768309	0.990569	0.204286	0.00536647
ZNF787	0.554464	0.00160825	0.987691	0.00892523	0.00186491
CARD14	0.674692	0.0265439	0.984405	0.0752073	0.0174376
CHST1	0.623706	0.00953427	0.996571	0.162938	0.00652276
BATF	0.609813	0.0056146	0.984062	0.022724	0.00356675
APC2	0.665348	0.0227364	0.988241	0.0939171	0.0195715
SPN	0.707441	0.0517403	0.993361	0.299473	0.0378265
TMEM260	1.32528	0.117083	1.00997	0.00986265	0.0284159
CD40LG	1.4555	0.0385723	1.01282	0.0456154	0.0480668
TMEM51	0.638788	0.0121222	0.989102	0.129766	0.00923056
PNPO	0.615707	0.00660042	0.994716	0.360356	0.0120193
YARS2	0.686901	0.0379038	0.993271	0.323401	0.029546
BICC1	1.82495	0.000852332	1.00928	0.000389255	0.000819997
TSPY1	1.56432	0.0134282	1.01418	0.040839	0.0157824
SH2B3	1.69926	0.00348204	1.01387	0.00297838	0.0024341
WNT2	1.42372	0.0504164	1.00769	0.144375	0.0213853
PSD4	0.617667	0.00815449	0.980602	0.00297535	0.00437573
ENPP1	1.9785	0.000156423	1.01026	0.00917363	8.29493e-05
PPP2R5E	1.68258	0.00399838	1.00371	0.294416	0.00436353
RIOK2	1.5289	0.0177521	1.01373	0.0726352	0.0180828
DDA1	0.664192	0.0223656	0.9908	0.0150689	0.0137144
MEGF9	1.65256	0.00604899	1.00236	0.543043	0.00827163
KIF22	0.693097	0.0444732	0.990639	0.0691361	0.0298089
CLCA1	1.6773	0.00439119	1.00771	0.123265	0.00691845
CETN3	1.39151	0.0634942	1.00236	0.307892	0.0488509
ROR1	1.45342	0.0372669	1.00819	0.017737	0.0338804
XAB2	0.667976	0.0255053	0.99252	0.105844	0.0225573
ZDHHC17	1.61978	0.00674007	1.00549	0.157071	0.0103113
NBEAL2	0.603717	0.00587868	0.984362	0.000186123	0.0168982
PDE8B	1.74225	0.00215889	1.01028	0.000442051	0.00151292
CLN6	0.48586	0.000126543	0.974954	0.000800661	5.56301e-05
MAST3	0.594541	0.00430427	0.969409	0.000708887	0.00264362
RTCA	0.70826	0.054798	0.99324	0.0366212	0.0397017
SFTPD	1.50085	0.0244333	1.00269	0.527522	0.0361615
TTLL4	0.707021	0.0499124	0.993194	0.25388	0.035751
TPST1	1.48226	0.0280854	1.00573	0.266659	0.0411135
AUNIP	1.50249	0.02254	1.01392	0.0147377	0.0324139
ACSBG2	1.49821	0.0263012	1.015	0.00839377	0.0368352
TRMU	0.678979	0.0297661	0.980888	0.0372466	0.0289676
TNFSF4	1.53306	0.0175817	1.00348	0.0842216	0.0133115
FLRT1	1.49453	0.0263964	1.01161	0.0372563	0.0343473
COG7	0.68949	0.0379165	0.988735	0.0654782	0.0328507
GADD45GIP1	0.602689	0.00521452	0.992724	0.00857791	0.00291816
APC	1.52973	0.0197071	1.01655	0.162577	0.00721314
PDGFA	1.44539	0.0382957	1.00535	0.0708538	0.0396491
SNAI2	1.76265	0.0014797	1.00743	9.53984e-05	0.00227637
GPM6B	0.533631	0.0007043	0.989577	0.00139192	0.00171767
BMP6	1.45376	0.0365809	1.00824	0.0230648	0.033576
NEK1	1.56307	0.0133058	1.02625	0.00138231	0.020102
ANXA13	1.5076	0.026222	1.007	0.280642	0.0207096
ADAM8	0.692271	0.0405983	0.979847	0.00111647	0.0275931
CORO2B	1.78309	0.00154081	1.01088	0.018741	0.00134703
EDNRA	1.76089	0.00146914	1.00366	0.000640454	0.00236609
LIME1	0.649084	0.0174958	0.986783	0.0185312	0.011156
KCNA5	1.65765	0.00500564	1.01484	0.00841901	0.00622283
NOVA1	1.46807	0.032125	1.01713	0.00229797	0.0478193
KCNJ2	1.51177	0.0217113	1.01348	0.00599167	0.0207329
DIAPH2	1.56149	0.0127989	1.01231	0.0405141	0.0021567
SLC7A9	1.44908	0.0379704	1.01222	0.0238956	0.0478145
FCHO1	0.551493	0.000887371	0.982386	0.000599378	0.0011046
PTPRN	1.39129	0.0660005	1.01728	0.176379	0.0409366
KIR3DL3	1.75431	0.00232424	1.01197	0.0175628	0.00273058
CRTAP	1.66251	0.00423221	1.00807	0.0976495	0.00656827
RBM28	0.600935	0.00447519	0.989214	0.0795004	0.0114139
SNED1	1.62678	0.00719929	1.02077	0.000343739	0.00990044
ASH1L	1.52207	0.0225024	1.01484	0.0283578	0.029478
SEC23IP	1.62237	0.00778908	1.01164	0.114026	0.00947814
EPN3	0.628055	0.0110972	0.98963	0.122418	0.00629059
ADAM5	1.63068	0.00693887	1.01232	0.0496425	0.00895266
TAPT1	1.4268	0.0507845	1.01107	0.132055	0.0496819
AGGF1	1.59963	0.0114265	1.03471	0.00102191	0.00845682
CHRM5	1.46455	0.034835	1.00885	0.0797448	0.0240307
STAB2	1.42822	0.0464827	1.01362	0.019241	0.0457255
USP19	0.593686	0.00416527	0.975653	0.0137237	0.00344545
BAMBI	1.98738	0.000166102	1.00326	0.0257818	0.00025201
NFKB2	0.626923	0.0113014	0.986571	0.0334477	0.00992761
MAN2A1	1.67601	0.003954	1.00566	0.118198	0.00360226
FGD1	1.45355	0.0384075	1.01126	0.097653	0.0287204
ACSL1	1.5634	0.0130411	1.00565	0.0867546	0.013031
POLR3D	1.39138	0.063158	1.02551	0.00227202	0.0379151
ABCB8	0.60924	0.00609924	0.977762	0.0123541	0.0153394
PNMA3	0.631517	0.010894	0.989867	0.156156	0.014012
DCPS	0.704385	0.0488557	0.993744	0.404542	0.0384128
BTN2A2	0.634889	0.0113356	0.971797	0.0076146	0.00748382
EDNRB	1.72858	0.00207834	1.00071	0.816144	0.00288453
SPRR2B	1.34795	0.0959628	1.01612	0.025241	0.0460845
BOLA1	0.704584	0.0491937	0.994702	0.164282	0.0351878
HIPK1	1.43793	0.0432819	1.00347	0.284028	0.04462
RPLP2	0.627286	0.0106142	0.998033	0.666309	0.00670617
DLK1	1.48781	0.0260992	1.0004	0.113631	0.0256606
FLI1	1.57113	0.0128851	1.01789	0.0213635	0.00659624
SNCAIP	1.46643	0.0328636	1.00849	0.00323261	0.0239855
PTCD2	1.60406	0.00890924	1.00912	0.0902799	0.0118388
ACAD10	0.687637	0.0399469	0.987662	0.0766287	0.0437303
C6orf120	1.47657	0.0300756	1.00516	0.0811767	0.0444625
ABCB7	0.571716	0.00210116	0.981544	0.0156094	0.00105074
NAA35	0.603964	0.00560966	0.98976	0.0447555	0.00419999
GPRASP1	1.73949	0.00245483	1.00285	0.0188354	0.00290726
CASQ2	1.59661	0.0103685	1.0161	0.000928309	0.00653907
GPR4	1.33542	0.10535	1.00824	0.219533	0.0402664
BCCIP	0.700052	0.0455868	0.995388	0.376503	0.0387883
CLPB	0.706176	0.0498394	0.985721	0.0523174	0.0397937
RBMS3	2.02526	0.000156892	1.01417	0.00224729	0.00023623
ANKRD12	1.50745	0.0211395	1.00672	0.25763	0.0260166
LRRC49	1.50583	0.0221599	1.00407	0.333479	0.0277294
PALMD	1.37937	0.0717575	1.00115	0.769084	0.028003
IL21	1.52918	0.0200496	1.01386	0.0127098	0.0152729
VPS9D1	0.662432	0.0237046	0.977422	0.00101239	0.0401193
TRPM4	0.64202	0.0129108	0.991986	0.104225	0.0188703
MATK	0.661298	0.021339	0.981764	0.0137241	0.0198215
ALKBH4	0.722766	0.069552	0.984234	0.104009	0.0478586
COQ2	0.672666	0.026179	0.990364	0.0632741	0.0164234
LPL	1.57783	0.0110635	1.00244	0.149676	0.0139384
MIA	0.690367	0.0365748	0.995478	0.525828	0.0430132
RALYL	1.89024	0.000719177	1.02493	0.000562635	0.000255112
ANGPTL4	0.67802	0.0302505	0.996363	0.435799	0.023983
NR2F1	1.42417	0.0463332	1.0059	0.00184503	0.0410107
CBR1	0.652499	0.0170828	0.989051	0.0693134	0.0117542
TRAPPC2	0.722163	0.0677631	0.992885	0.224815	0.0489859
BTN3A2	0.611983	0.00630299	0.978218	0.00418904	0.00487267
VLDLR	1.30531	0.132123	1.0022	0.278318	0.0424858
LPAR3	0.638305	0.0118902	0.986244	0.00821762	0.00706243
LTK	0.596566	0.00388536	0.993621	0.367456	0.00244178
JMJD1C	1.48829	0.0262923	1.01011	0.0277326	0.0340191
ACAP1	0.690527	0.0405331	0.992746	0.157027	0.0381127
TOP3B	0.503636	0.000182149	0.956352	0.000449959	8.78344e-05
TNFAIP6	1.88105	0.000508347	1.00666	0.025756	0.000785874
CEACAM7	1.58625	0.0136651	1.02559	0.00755049	0.0159609
OXTR	0.652006	0.0176763	0.998095	0.0963803	0.0120494
TRIM17	0.685098	0.032948	0.987147	0.066102	0.0303999
FOXO4	0.587262	0.00385479	0.985161	0.0346829	0.00653545
P2RY6	0.668468	0.0229633	0.991453	0.34489	0.0171842
HEPH	1.67986	0.00372229	1.00485	0.0183969	0.00183261
CPED1	1.55015	0.0156605	1.01897	0.00800724	0.0244016
GTF2H4	0.570509	0.00208311	0.97582	0.00034831	0.00226015
LRRC14	0.701786	0.0461595	0.963521	0.00066233	0.0327516
INSL3	1.47355	0.034318	1.00703	0.052444	0.0197137
GSTA1	1.41887	0.0506973	1.0126	0.0128466	0.0461628
SCUBE2	1.48644	0.0275139	1.00442	0.173409	0.0356991
ETV7	0.670125	0.0249216	0.992098	0.306217	0.0447104
PASK	0.659599	0.0213063	0.992907	0.365545	0.0237668
ZFHX2	0.614668	0.00675653	1.00238	0.814017	0.00789662
TBC1D12	1.67	0.00452601	1.023	0.00938441	0.00361542
ARSD	0.672088	0.0256207	0.987537	0.172116	0.0306173
PPCDC	0.696272	0.0438706	0.98165	0.0508979	0.0326991
RASL12	1.65033	0.00488502	1.01044	0.000141736	0.00750839
DACT1	1.64512	0.00526214	1.0072	0.0221488	0.00304404
PHACTR2	1.5175	0.0208075	1.01973	0.00471582	0.0163051
CD1E	0.6187	0.00811901	0.982215	0.0659986	0.0117135
CPNE7	0.702665	0.0479765	0.990899	0.3138	0.0438875
RAI1	0.624741	0.0088276	0.988689	0.208254	0.00480118
SSX1	1.6111	0.00807702	1.00831	0.0215319	0.00927054
NUDT7	1.48905	0.029447	1.01176	0.0546789	0.0388956
SNPH	0.666129	0.0231909	0.993231	0.416068	0.0237249
KIT	1.6725	0.00453145	1.00738	0.00691833	0.00629238
AADAC	0.705258	0.0497092	0.99301	0.0511308	0.0443645
COL14A1	1.38975	0.0633495	1.00108	0.235849	0.0444525
RCAN2	1.59136	0.00896752	1.00574	0.0278397	0.00947292
HRG	1.44463	0.0407031	1.01314	0.0236072	0.0241547
ASIC2	1.47191	0.0301231	1.03677	0.000894983	0.0195389
SLC29A2	0.652058	0.0165124	0.990712	0.123557	0.00953849
IQGAP2	1.83432	0.000719327	1.00577	0.144397	0.00035768
MPPED2	0.651949	0.0166158	0.99474	0.0271628	0.0255233
TNRC6B	0.714506	0.0615805	0.989314	0.26875	0.0482494
RAMP2	1.54899	0.0151274	1.01339	0.0247939	0.0106899
SLC7A11	0.700306	0.0454254	0.997888	0.252971	0.0302012
FHOD3	1.425	0.0493719	1.01713	0.0027695	0.0484813
SLC17A2	1.49404	0.0247166	1.02287	0.0790611	0.014524
CAND2	0.675928	0.0271023	0.984445	0.0402703	0.0163285
CTRL	1.49978	0.0247708	1.01361	0.151689	0.0313163
CACNG1	0.70177	0.0450434	0.994853	0.648018	0.0311225
N6AMT1	1.33826	0.104588	1.0314	0.0257616	0.0467622
SERPINB7	1.71299	0.00358762	1.00364	0.106682	0.00538676
SURF2	0.591337	0.00367168	0.981032	0.0438458	0.00212859
HPCAL4	0.7069	0.050975	0.993748	0.561915	0.0450312
CRYBB2	0.695066	0.0404284	0.986774	0.353386	0.0286681
ABHD5	0.647125	0.0141099	0.994011	0.632227	0.0259097
LILRA5	1.48062	0.0310734	1.01707	0.0856409	0.0393494
PRICKLE3	0.583463	0.00246534	0.976607	0.0237006	0.00251085
CD80	2.01622	0.000191095	1.02427	0.00133548	0.000300093
XRCC3	0.711971	0.0558512	0.993002	0.522332	0.0417747
LDB2	2.16224	1.70443e-05	1.00776	0.000378073	2.31199e-05
MS4A5	1.46731	0.0325298	1.01031	0.13097	0.0409903
BMP5	1.54881	0.0153899	1.01984	0.0105014	0.0199935
NPAP1	1.4639	0.0352567	1.02212	0.0534525	0.0371422
ZNF767P	0.638497	0.0126571	0.983265	0.00783456	0.00773236
IQCC	0.653919	0.0186938	0.985147	0.0566865	0.0180286
LY6G5C	1.44268	0.0421345	1.02288	0.00565331	0.042534
ADH1B	1.61859	0.00735794	1.00107	0.0844014	0.00730382
ZNF200	1.57596	0.0115048	1.02986	0.00226294	0.0131336
AHSA2	0.63885	0.0128825	0.986977	0.0127723	0.0200542
ZNF124	1.50272	0.0237051	1.00593	0.296184	0.0361188
AGT	1.63495	0.00712525	1.00145	0.32113	0.00891827
SPI1	0.635872	0.0119144	0.982927	0.0384747	0.0240691
TRIM68	1.40709	0.0547792	1.00636	0.467744	0.0439546
SLC5A1	0.688492	0.0347757	0.989154	0.160123	0.0247155
GH2	1.50404	0.0256894	1.02335	0.0154619	0.0362226
THOP1	0.649328	0.0179385	0.972225	0.00861414	0.0345998
TICAM1	0.641597	0.0128464	0.974164	0.00941517	0.00785232
CYP4B1	0.563933	0.00134326	0.998561	0.101899	0.00157035
WASF1	1.57814	0.0102488	1.00647	0.0503399	0.00549927
PRRX1	1.52546	0.0175855	1.01668	0.00715678	0.00647308
ABHD8	0.66081	0.0217339	0.974314	0.0745192	0.0171326
MRAS	1.48754	0.0275982	1.02772	0.021762	0.0375889
LY96	1.30182	0.135533	1.00208	0.369255	0.0374347
SYNE1	1.73298	0.0020781	1.01547	1.53052e-05	0.00243199
RIMBP2	1.5354	0.0169674	1.01253	0.0408993	0.0198145
TUT1	0.699131	0.0502957	0.975603	0.0181091	0.0398259
B3GNTL1	0.684322	0.0360836	0.972614	0.00685713	0.0279899
FES	0.684332	0.0334157	0.966652	0.0128687	0.0468344
CEP131	0.685353	0.0379108	0.973242	0.00104908	0.0405025
GYG2	1.52563	0.0182588	1.03317	0.00397051	0.00544591
DPYSL4	0.683968	0.0315706	0.981627	0.150055	0.0370558
SLC35G2	1.53076	0.0189509	1.00334	0.607792	0.0290139
PPP1R1A	1.53936	0.0152907	1.00453	0.192347	0.00482504
SPINK2	1.39322	0.0639433	1.0122	0.116777	0.0281392
KIN	0.711226	0.0546851	0.995499	0.468965	0.0419214
CCL21	1.68326	0.00448114	1.01019	0.0145402	0.00467552
SLC6A16	1.51386	0.0208077	1.02308	0.0241719	0.0163362
THAP10	1.56262	0.0132938	1.01705	0.0103308	0.0149558
SLC47A1	1.77686	0.00133309	1.00832	0.0309412	0.00120105
VANGL1	0.592302	0.00388161	0.983496	0.0261356	0.00706058
COL4A5	1.48259	0.0309807	1.00394	0.189015	0.0291815
AQP5	0.610937	0.00576226	0.982184	0.0132715	0.00488316
KRT14	0.68422	0.0336962	0.996207	0.060158	0.0275392
PLCB4	1.52016	0.0188545	1.01567	0.0396017	0.0240962
MARK1	1.49372	0.0250817	1.03061	0.0166716	0.0289701
PDE4D	1.52363	0.0177465	1.02358	0.0616544	0.0123945
GUCY2D	0.720429	0.0644193	0.958487	0.0290147	0.0422143
NT5E	1.54817	0.0135192	1.0151	0.00115189	0.0149108
SLC19A2	1.60484	0.0078579	1.00532	0.0270527	0.0120067
TRHR	1.52582	0.0212162	1.02315	0.0109667	0.00755934
CCL16	1.51243	0.0213445	1.00858	0.163196	0.0287351
ITGA8	1.51097	0.0215606	1.01894	0.000595211	0.0300475
TRPA1	1.4922	0.0288701	1.02374	0.0672826	0.0326411
ESR2	0.6928	0.0390183	0.992899	0.440766	0.0295165
BMX	1.47454	0.0313928	1.02638	0.00313121	0.0457498
ZNF696	0.522988	0.000456819	0.967003	0.0018838	0.000256283
ABCA7	0.614545	0.00650207	0.98221	0.0341529	0.0111143
PIEZO2	1.49535	0.0242866	1.0171	0.0419997	0.0285697
CHST7	1.56259	0.0143646	1.02345	0.000208172	0.022422
ABCG2	1.72127	0.00296404	1.0189	0.000137947	0.00268953
NID1	1.47903	0.02872	1.02988	0.000277451	0.0110753
PTPRH	0.705138	0.049702	0.990242	0.372105	0.0420145
LLGL2	0.660476	0.0219894	0.98383	0.003401	0.0138248
CRLF1	0.68113	0.0301268	0.997469	0.481441	0.0197638
CHRNB1	1.50929	0.0224034	1.03086	0.0262275	0.027908
POMGNT1	0.676581	0.0314134	0.992884	0.432065	0.0203274
MN1	1.86183	0.000529136	1.00658	0.0603559	0.000832691
FUT5	0.661839	0.0218663	0.98503	0.101108	0.0349723
LY75	0.714501	0.0596354	0.997202	0.188476	0.0421316
ODF2	0.665416	0.0242512	0.969475	0.0130693	0.0195885
CCDC22	0.690355	0.0379005	0.969757	0.00232971	0.0373998
DDX52	1.50804	0.0203241	1.01778	0.17372	0.0254458
DNAJC12	1.58502	0.0101272	1.0111	0.125028	0.00633695
NR1H4	1.6068	0.0111399	1.02171	0.00871533	0.0168908
CHRM3	1.47204	0.0394317	1.01385	0.200794	0.0473541
XYLT1	1.72865	0.0021422	1.02032	0.000217044	0.00186547
SAMD14	0.687639	0.0344049	0.988178	0.296512	0.029396
CNPY4	0.683149	0.0327823	0.987888	0.116773	0.0210862
HTR7	0.624617	0.00852508	0.978615	0.151013	0.00716759
RBP3	0.650391	0.0162238	0.964618	0.0977314	0.0122268
ZBTB48	0.651337	0.0191298	0.975535	0.00762005	0.0133708
NCAPG	0.678996	0.0300228	0.989398	0.0367906	0.0191951
PNMA2	1.53564	0.0159207	1.00458	0.131969	0.0165738
DIRAS3	1.43091	0.0446844	1.0008	0.552053	0.0338723
CEP41	1.52962	0.0188948	1.03376	0.0196292	0.0254421
FABP3	0.65545	0.0185479	0.985712	0.0320936	0.0330364
RB1	1.56226	0.0130375	1.01241	0.0150505	0.00939998
CHD1	1.7935	0.00131215	1.00759	0.0991181	0.00150686
BBOX1	0.621709	0.00779301	0.997331	0.151416	0.00968611
NUFIP1	1.60371	0.00843148	1.02741	0.00332585	0.0114425
MTL5	0.617875	0.00695285	0.984346	0.134058	0.00384733
FUT7	0.674077	0.0270372	0.987708	0.0864018	0.0460675
ACTR3B	0.659882	0.0214712	0.985742	0.227077	0.0298795
ADRA2A	1.57587	0.0106507	1.02131	0.00340393	0.0113231
SERGEF	0.676918	0.0309192	0.978869	0.2965	0.0246332
MEIS3P1	1.55433	0.0135029	1.01895	0.0673397	0.0155731
SYT1	1.53995	0.0175385	1.0121	0.0167635	0.0200786
TCEAL2	1.53316	0.0159696	1.00183	0.125146	0.00580911
CLSTN2	1.41923	0.052494	1.04181	3.31469e-05	0.0479583
NOTCH4	1.50606	0.0229445	1.01766	0.271091	0.0131685
SMAD5	1.57512	0.0117856	1.03054	0.00942096	0.00343646
RASA3	1.47906	0.0333217	1.02301	0.152797	0.036778
WNT4	1.3079	0.129083	1.00924	0.00260867	0.0410976
GZMH	1.41164	0.0557152	0.996779	0.688542	0.0333415
HCRTR2	1.54316	0.0170824	1.02926	0.0144578	0.0238888
PRKD1	1.51279	0.0205637	1.01741	0.0232912	0.0301058
CLN8	1.56724	0.01305	1.08927	0.00188353	0.0107419
ATP6V1G2	1.80702	0.00126411	1.03988	0.000330302	0.00193793
CMAHP	1.75262	0.00189186	1.01417	0.00526746	0.000676349
ADRB2	1.6864	0.00427824	1.02145	0.0111956	0.00607349
KLKB1	0.593392	0.00461941	0.981177	0.175718	0.0225713
CAPN15	0.68349	0.034479	0.986592	0.103253	0.0307411
MC5R	1.57773	0.0129863	1.02286	0.0629495	0.0151589
POPDC3	1.48202	0.030762	1.0285	0.00341819	0.0391545
BTN1A1	1.53563	0.0173657	1.01846	0.0282518	0.0221864
LTB4R2	0.629051	0.010369	0.983005	0.0754426	0.00692094
PRKCG	0.589544	0.00338487	0.978838	0.355068	0.00170447
MICAL3	0.687359	0.0387261	0.985416	0.0734953	0.030309
WBP4	1.57936	0.0110601	1.04131	0.00251183	0.0105226
SCUBE3	1.66659	0.00585878	1.01292	0.0444135	0.00289386
SOCS2	1.59581	0.0097175	1.00868	0.000971721	0.00959438
PSD3	1.95019	0.000228623	1.02437	0.00188096	0.00030825
PIGH	1.53307	0.0179032	1.03005	0.0181989	0.0209397
GFM1	1.40161	0.057091	1.03102	0.0122471	0.0430439
SPRR1B	1.71924	0.00310205	1.02503	0.00130916	0.00176146
FLT1	1.54911	0.0167736	1.05643	0.0056848	0.0130161
HSD17B6	1.57249	0.0129473	1.02714	0.00109907	0.0198446
AKR1B10	1.5868	0.00981824	1.00669	0.0104283	0.011495
PRRG2	0.546796	0.000794804	0.963471	0.0153291	0.000887616
FBN2	1.57859	0.0107389	1.00003	0.979465	0.015129
DNAJB14	1.5495	0.0153116	1.02084	0.0643154	0.020143
C21orf62	1.4001	0.0656784	1.03624	0.0053839	0.0455518
WRAP73	0.608772	0.00584604	0.974799	0.0409974	0.00693518
OTUB2	1.49373	0.0245653	1.02676	0.0995626	0.0337761
ZNF365	1.59902	0.00982133	1.0193	0.0425588	0.0120516
E2F2	0.623354	0.0077397	0.96636	0.109843	0.00470869
RAB3B	1.58778	0.0107687	1.03593	0.00957638	0.0132646
EMCN	1.66799	0.00469752	1.01362	0.00781643	0.00685232
PCDHA10	0.607015	0.00595173	0.97841	0.087491	0.00870775
JAKMIP2	1.31474	0.127606	1.0273	0.0373702	0.0385912
HLF	1.45684	0.034196	1.0485	5.19416e-05	0.031414
CACNA1B	0.71166	0.056086	0.973086	0.0882082	0.043164
ZNF286A	1.61988	0.00761392	1.04091	0.00968798	0.00917527
GPR135	1.60591	0.00901661	1.02179	0.0811757	0.0132965
IGF2BP3	1.38541	0.0657665	1.00349	0.0951219	0.0464797
AHSG	0.673376	0.0266833	1.00014	0.988698	0.0183797
NLK	1.60951	0.00770226	1.04258	0.0238691	0.00701524
DSG3	1.54415	0.0164141	1.03308	0.00206029	0.0195303
GALNT12	0.710613	0.0576655	0.983079	0.0690044	0.0455456
PLA1A	1.5728	0.0127229	1.00974	0.0378893	0.0111291
CCKBR	1.51042	0.0228796	1.02039	0.133335	0.0338101
TEAD1	1.43636	0.0427572	1.02609	0.0513045	0.0161821
FAM149A	1.56505	0.0117024	1.04102	0.0253056	0.00847991
EVI5	1.43362	0.0456573	1.00763	0.454311	0.0488405
ZNF205	0.702293	0.0487003	0.986326	0.0982589	0.0321147
ZNF506	0.672942	0.0264801	0.948089	0.0157778	0.0240137
CDT1	0.716645	0.0600818	0.978793	0.0553049	0.0433711
DNM3	1.53935	0.0157087	1.01981	0.0498542	0.0191333
AGTR1	2.25016	1.42946e-05	1.00646	0.0818704	1.71573e-05
ZNF180	1.42387	0.0489808	1.03327	0.0027976	0.0195319
ALDH1A1	1.70417	0.00287095	1.0032	0.0619662	0.0015712
MRPL19	0.678941	0.0312449	0.993281	0.629895	0.0367595
KIR3DX1	1.47412	0.0327123	1.02521	0.104394	0.0416763
SH3TC2	1.41835	0.0554098	1.02745	0.00421052	0.0196133
SLC12A6	1.74431	0.0025231	1.02843	0.0426513	0.00249412
ERG	1.6716	0.00400974	1.01524	0.214135	0.00208278
DSC3	1.53476	0.016091	1.02587	0.0571905	0.022163
OSR2	1.39042	0.0626773	1.00834	0.000396694	0.0346646
FRY	1.49348	0.0235693	1.00791	0.0914373	0.0047293
SCYL2	1.56286	0.0161928	1.03321	0.00287063	0.0168583
APOH	1.41826	0.0510239	1.00625	0.287074	0.0235624
SLC18A1	1.48121	0.0306093	1.03262	0.0109428	0.024938
SEC14L2	0.644688	0.0136197	0.957899	0.0446057	0.00961914
CNTLN	1.77038	0.00217941	1.04561	0.00509329	0.00271572
ARHGAP28	1.48511	0.0269992	1.02291	0.0604811	0.0259605
SEC14L4	0.65479	0.019738	0.977642	0.20764	0.0189587
MAGEL2	1.58555	0.0105601	1.0259	0.0117584	0.00493539
ULBP1	1.4282	0.0495216	1.01703	0.242644	0.0490692
PODXL2	0.643456	0.0149934	0.977092	0.0338907	0.0166581
GDAP1	1.49193	0.0256028	1.04791	0.0452819	0.018597
TMEM262	0.72453	0.0716295	0.977513	0.100447	0.049421
NETO2	1.41833	0.0519289	1.00197	0.577345	0.0424626
RBM17	0.612768	0.00692427	0.969926	0.0680567	0.00469387
ITK	1.43171	0.0449441	1.01052	0.563071	0.0171534
FAM83E	0.551666	0.000998806	0.955209	0.0147373	0.00141458
SLC22A6	0.642345	0.0155058	0.977582	0.100377	0.0165067
TGFBR1	1.541	0.0175336	1.04801	0.00655469	0.0196368
AP3B2	0.670973	0.0255364	0.949018	0.00915726	0.0408784
GULP1	1.42739	0.0468371	1.0213	0.0358213	0.0483234
GRIK3	1.5096	0.022269	1.03325	0.0230956	0.0310092
TBCEL	1.55073	0.015119	1.03759	0.0968127	0.0214546
PDK4	1.73032	0.00292075	1.03432	0.000820648	0.00364862
KLHL36	0.70511	0.0480456	0.971819	0.157659	0.0371839
FIP1L1	0.678924	0.0310894	0.957538	0.0178737	0.0253595
BAG2	1.6422	0.00666707	1.00403	0.282943	0.00461629
LRP2	1.4357	0.0434407	1.01695	0.175952	0.0134948
ITPKA	1.53663	0.0180309	1.02044	0.267048	0.0254118
ZSCAN5A	1.51815	0.0214803	1.06198	0.00142484	0.0122943
ZIC3	1.52014	0.0214768	1.04133	0.00719805	0.0204992
MSX2	1.47846	0.0316121	1.04294	0.0474327	0.046922
AGER	0.659961	0.0216902	0.965893	0.0140965	0.0138654
SERINC2	0.697958	0.0436304	0.964872	0.0371278	0.029893
RRAGB	1.49498	0.0249691	1.01617	0.348897	0.0297068
BACH2	1.91044	0.000355728	1.0592	0.000640928	0.000321525
REL	1.54166	0.0183662	1.03323	0.0288402	0.0264168
GTF2A1	1.50352	0.0265202	1.02563	0.165285	0.0338232
SNAPC1	1.46749	0.0320036	1.01514	0.0941675	0.0393774
HSD17B2	1.43197	0.0475707	1.01434	0.234261	0.0339032
KALRN	1.39353	0.0624518	1.03328	0.0736905	0.0427035
IFT22	1.50448	0.0224297	1.03034	0.0506594	0.0183525
ZSCAN2	0.707279	0.0518982	0.99705	0.901463	0.0493629
NAP1L3	1.42439	0.0459904	1.00262	0.312388	0.0488242
TFPI	1.97979	0.000145607	1.00966	0.0018505	0.000111238
SH2D3C	1.43911	0.0415974	1.02073	0.133113	0.0481234
TLR4	1.53466	0.0178476	1.04735	0.0372927	0.023052
SCRG1	1.45116	0.0371253	1.00256	0.110922	0.0358153
HOXA1	1.50709	0.0228713	1.06611	0.00475363	0.00850617
THSD7A	1.66858	0.00531806	1.05665	2.67486e-06	0.000632395
CDH5	1.5264	0.0172142	1.01273	0.0121181	0.0196156
ENDOU	1.51091	0.0221047	1.01891	0.113346	0.03091
BEAN1	1.52487	0.0190709	1.05257	4.28925e-05	0.0269323
GHR	1.60689	0.0095066	1.00642	0.168878	0.00661123
S1PR1	1.77121	0.00168776	1.08371	0.000163509	0.00220536
CCPG1	1.48309	0.0270384	1.02383	0.12724	0.0396755
FOXF1	1.51326	0.020505	1.04626	0.00409995	0.0255607
PENK	1.65475	0.00491502	1.0064	0.153469	0.00383445
RAB23	2.13234	7.8785e-05	1.02693	0.0272833	0.000102707
TP53AIP1	0.685205	0.033609	0.976058	0.163827	0.0392683
ISL1	1.47038	0.0301544	1.02877	0.00368202	0.0431009
OR1A2	1.41999	0.0525464	1.02627	0.0378473	0.0326678
NEDD4	1.59771	0.0100217	1.0818	0.00216936	0.0049683
TBX3	1.46224	0.0324198	1.00835	0.0633376	0.0250801
ZNF516	1.5766	0.0111552	1.02746	0.00735976	0.0125061
PPM1H	1.45024	0.0358321	1.00056	0.963021	0.0357476
PID1	1.47834	0.0282775	1.01071	0.0560105	0.042494
TAS2R14	1.71074	0.00301522	1.02546	0.0230074	0.00450022
CYP2W1	0.661803	0.0227214	0.967915	0.120551	0.0136072
WFDC8	0.720352	0.064249	0.981331	0.303761	0.041572
TRPV4	0.651404	0.016478	0.975381	0.22448	0.0105214
UBQLN3	1.46631	0.0377203	1.03826	0.0124556	0.0205546
HS3ST3A1	1.57287	0.0117359	1.00177	0.761135	0.0103087
NR3C2	1.565	0.0123599	1.03222	0.00520219	0.0168752
HCN2	0.643583	0.0143475	0.920526	0.0144727	0.0139513
COL17A1	0.693562	0.0411091	0.994415	0.806902	0.0436074
LIN7A	0.715389	0.0584048	0.961671	0.135077	0.0383708
OR2J3	1.40389	0.0616319	1.06639	0.0255023	0.0471839
GPM6A	1.53921	0.0164338	1.01378	0.320822	0.0245252
MAGI2	1.60197	0.00869981	1.012	0.192433	0.0129812
AZU1	0.5624	0.00123602	0.904737	0.0102755	0.00178064
NAT8B	0.571995	0.00210612	0.951433	0.078536	0.0141372
PDE10A	1.41388	0.0555017	1.0625	0.0113114	0.0487713
ADAMTS3	1.42098	0.0486528	1.0029	0.747179	0.0459668
ENOX1	1.8125	0.00102308	1.04217	0.0352585	0.00109983
S100G	1.64135	0.00725654	1.05227	0.0330593	0.0089921
DNAJB4	1.59619	0.00990173	1.01577	0.056437	0.0121479
HTR2B	1.60518	0.00919034	1.01563	0.002539	0.00736021
GP5	1.41165	0.0521658	1.03449	0.0213736	0.0390156
FAT4	1.86872	0.000721862	1.05324	0.000743802	0.000820963
FAM124B	1.604	0.00914184	1.04946	0.00764227	0.012493
BDNF	0.696275	0.0418281	0.970815	0.251955	0.0308618
EYA4	1.39453	0.0615707	1.02991	0.00284767	0.0434041
SOX3	0.704897	0.0508085	0.960941	0.192888	0.047459
SYNJ1	1.44162	0.0435409	1.04052	0.0293822	0.0376815
FBXL8	0.643999	0.0139115	0.924536	0.00137996	0.0124403
EHF	0.686667	0.0348148	0.997158	0.626402	0.025999
ZFP37	1.35377	0.09283	1.0787	0.0109484	0.0448752
NMBR	1.44891	0.039413	1.0269	0.0211103	0.0270686
MCTP1	1.60587	0.00800646	1.08558	3.95348e-05	0.00912273
DDX6	1.47965	0.0287757	1.02381	0.151963	0.0382193
AZI2	1.57698	0.0123401	1.01497	0.276334	0.0158241
C8orf44	0.709351	0.053548	0.976169	0.118724	0.038592
NLGN4X	1.6066	0.0079418	1.00275	0.576014	0.00406857
TPT1P8	1.4656	0.0315802	1.03234	0.0975579	0.0421848
GPR39	0.600964	0.00456985	0.903063	0.00190401	0.013029
SPATA6L	1.45428	0.0367236	1.04113	0.0412666	0.0406745
ZSCAN16	0.614671	0.00664903	0.952522	0.00579765	0.00825681
DKK1	1.57036	0.0128532	1.05493	0.00144299	0.0198739
RND1	0.681242	0.0306346	0.957299	0.126561	0.0216263
DGKH	0.644401	0.0138046	0.96443	0.266555	0.00978731
LECT2	1.52725	0.0204669	1.05056	0.00383183	0.0134419
EIF1AY	1.47178	0.0334219	1.09348	0.00740227	0.0479238
ALOX12B	1.52345	0.0210523	1.03782	0.232694	0.0164009
CCDC68	1.5476	0.017883	1.04377	0.0273468	0.0232478
CXCL3	0.645248	0.0143948	1.00236	0.639292	0.00881688
MAK	0.687798	0.0349458	0.966572	0.15536	0.0234867
TDRD1	1.44824	0.0367907	1.05193	0.00413143	0.0421339
PROCR	1.49496	0.0239591	1.00571	0.32921	0.0340524
GABRA3	1.59462	0.00963408	1.0228	0.161675	0.00453016
IGLL1	0.639238	0.0120053	0.947182	0.0489262	0.00863718
IFNA1	1.43392	0.0429081	1.012	0.767043	0.0454241
SACS	1.65474	0.00515635	1.04688	0.00641808	0.0072767
ABCA6	2.05056	0.000110949	1.11932	7.94248e-06	5.14322e-05
KRT16	0.693985	0.0407993	0.963614	0.0211045	0.0439982
ZBTB32	0.580331	0.00264028	0.910077	0.00480916	0.00178295
CCDC69	1.47391	0.0296061	1.019	0.0857184	0.0374152
ZNF702P	1.44307	0.0409339	1.03019	0.0799686	0.0346056
IFT140	0.59325	0.00447536	0.943241	0.0204037	0.0120049
SYT5	0.543587	0.000754145	0.921561	0.00273075	0.000366127
ALB	1.45914	0.0363232	1.00612	0.316142	0.0440734
ABCB1	1.46122	0.0341521	1.06896	0.000349998	0.0347905
ZNF440	0.698364	0.0457932	0.908509	0.0132164	0.0311518
SLC7A2	1.5247	0.0200943	1.05903	0.0411314	0.0264002
MLLT1	0.614331	0.00666886	0.892153	0.00724268	0.00438646
EPB41L3	1.64553	0.00713084	1.08573	0.000388688	0.0104332
AP1AR	1.46591	0.0307661	1.0362	0.0987572	0.0231154
APOBEC3F	0.651295	0.0170875	0.941475	0.0203367	0.0107707
ATG2B	1.44025	0.040599	1.01929	0.545379	0.0461742
PLCH1	0.642986	0.0129182	0.986851	0.709036	0.0486476
HOXA2	1.55881	0.0143708	1.0754	0.0161077	0.00703618
MAGEA12	1.45362	0.0365098	1.00194	0.612548	0.0418593
RASGRP3	1.36417	0.080014	1.06848	0.009168	0.0468562
ZNF571	1.66692	0.00553302	1.00363	0.699896	0.00167997
PGAP1	1.52693	0.01976	1.00744	0.446332	0.0217677
NTRK1	0.692216	0.0385048	0.93311	0.0277543	0.0448673
MMP3	1.44504	0.0423311	1.0903	0.0334545	0.0388908
UCN	0.633671	0.0112294	0.924259	0.046065	0.0065959
PTPN13	1.45877	0.0332105	1.01947	0.0577138	0.0475747
SLC52A1	0.69462	0.0442068	0.913523	0.0708808	0.0489662
PLCL1	1.54946	0.0154369	0.9999	0.993635	0.0184098
KLHL4	1.59647	0.0105014	1.08617	0.0010489	0.00667894
SPATA7	1.44605	0.039847	1.02455	0.390545	0.0399962
NPY1R	1.50502	0.0224491	1.01877	0.0306193	0.0265513
AZGP1	0.658098	0.0192843	0.973664	0.0804927	0.0156617
SOAT1	1.50652	0.0212656	1.04515	0.0855503	0.023638
SYNC	2.10837	5.55216e-05	1.02799	0.0272064	4.09696e-05
ADAMTSL3	1.74693	0.00249125	1.07692	0.000363463	0.00229535
COL21A1	1.41567	0.0499608	1.02407	0.00389141	0.0176243
SSTR5	0.57235	0.00230926	0.933312	0.103538	0.00120961
FGF7	1.89154	0.000515846	1.0461	0.00538315	0.000581479
CDH13	1.6384	0.00592902	1.10018	0.00269288	0.00672884
BCL11B	1.39375	0.0631977	1.04689	0.199144	0.0458567
RYR3	1.54486	0.0151693	1.0266	0.0361997	0.00952814
OGN	1.72631	0.00244176	1.00179	0.507211	0.00344369
SERPINA10	0.676602	0.0292959	0.96196	0.405579	0.019257
GUF1	0.686076	0.0344773	0.992088	0.905805	0.0354826
SCN3A	1.60923	0.00779465	1.03321	0.123825	0.0084903
TRHDE	1.5554	0.0127759	0.992637	0.553677	0.0123567
GIPC2	1.601	0.00838016	1.05731	0.0146397	0.0110594
CTAGE1	1.49917	0.0247448	1.04886	0.00444124	0.0175342
INADL	0.60794	0.00599973	0.873536	0.00252071	0.00432947
ARL15	1.45135	0.0381714	1.05638	0.127973	0.0266529
CT62	0.681068	0.0317682	0.940927	0.0391079	0.0249937
PTHLH	1.66149	0.00512627	1.06436	0.0330858	0.00384287
YEATS4	0.642499	0.0140511	1.01275	0.444008	0.00801472
GALR1	0.690545	0.0387488	1.01438	0.765966	0.0273611
CYP4F8	0.698973	0.0442681	0.918776	0.152827	0.0305326
RFXAP	0.681324	0.0314265	0.898093	0.0500155	0.0226169
BPNT1	1.41828	0.0513222	1.02073	0.575356	0.0387644
ATP8B4	1.39292	0.0620167	1.13701	8.5809e-05	0.0450993
CRISP3	0.688951	0.0376058	1.00176	0.384191	0.0332107
VPREB1	0.717611	0.0654067	0.905911	0.119921	0.043488
POU4F3	0.698155	0.0431644	0.885658	0.0649483	0.0446014
TMEM255A	1.51663	0.020279	1.03155	0.0747599	0.0177429
CDKN2B	0.610938	0.00631477	0.940346	0.186074	0.0115899
ZEB2	1.64914	0.00499197	1.01477	0.295973	0.0071955
DIRAS2	1.42	0.04912	1.01779	0.050264	0.0388527
FGF8	0.547842	0.000743442	0.804683	0.0108646	0.00511099
NCAM2	0.708583	0.0518142	1.05121	0.221482	0.0492485
ZFP69B	1.47398	0.0294881	1.03298	0.0827134	0.0436185
TM4SF20	0.60186	0.0046487	0.937431	0.201437	0.0119253
DSPP	0.606737	0.00565387	0.954384	0.259005	0.0122756
SUSD5	1.50363	0.0223078	1.04806	0.314848	0.0256753
ST8SIA1	0.577546	0.0029088	0.771416	0.00329237	0.00335635
MEOX2	1.60824	0.00774607	1.02006	0.0540883	0.0122048
SLC12A1	1.52818	0.0174906	1.02469	0.190784	0.0258179
FAM169A	1.39903	0.0588923	1.08396	0.12358	0.0378019
ATP1B4	0.636291	0.0130757	0.857903	0.111628	0.0184702
AGBL3	0.664494	0.021875	0.845461	0.112624	0.0144784
RAD21L1	0.611265	0.00679993	0.88281	0.172738	0.00794322
CDR1	0.603332	0.00588108	0.827782	0.0829879	0.0327842
POLH	0.63027	0.0103241	0.827024	0.0122126	0.015111
ZNF750	1.76934	0.00149729	1.16626	0.0143891	0.00226697
SLC13A1	1.40501	0.0564192	1.12047	0.243746	0.0297035
TPH1	1.47263	0.0307609	1.16307	0.0718275	0.0370258
PTH	0.717719	0.0615616	0.921222	0.593041	0.0414734
TAF13	0.682335	0.0307614	0.764052	0.0443412	0.0329749
SPATA1	0.704169	0.0492873	0.91514	0.552758	0.0344766
