# Supplementary material for: Multifactor assessment of ovarian cancer reveals immunologically interpretable molecular subtypes with distinct prognoses
Source: Front Immunol. 2023 Dec 7;14:1326018. doi: 10.3389/fimmu.2023.1326018 (PMC10740166; doi:10.3389/fimmu.2023.1326018)
Supplement: Supplementary file 4 [file Table_3.xlsx]

## Sheet: KEGG
Table S3. Partial results of KEGG enrichment analysis for highly expressed genes of each subtype.
pathID	Description	E-ratio	p-value	subtype
path:hsa04612	Antigen processing and presentation	5.42632	1.5238e-06	subtype1
path:hsa03050	Proteasome	5.91962	4.68904e-05	subtype1
path:hsa03040	Spliceosome	3.38602	0.00010761	subtype1
path:hsa05168	Herpes simplex infection	2.87805	0.000124653	subtype1
path:hsa05012	Parkinson's disease	3.25579	0.000160699	subtype1
path:hsa03410	Base excision repair	5.91962	0.000429982	subtype1
path:hsa05016	Huntington's disease	2.66868	0.000463302	subtype1
path:hsa03060	Protein export	7.0778	0.000555836	subtype1
path:hsa04145	Phagosome	2.85982	0.000577727	subtype1
path:hsa04141	Protein processing in endoplasmic reticulum	2.58081	0.00150785	subtype1
path:hsa00190	Oxidative phosphorylation	2.71316	0.00232951	subtype1
path:hsa05010	Alzheimer's disease	2.38228	0.00440525	subtype1
path:hsa00480	Glutathione metabolism	3.32223	0.0165548	subtype1
path:hsa05416	Viral myocarditis	2.83112	0.0187231	subtype1
path:hsa03030	DNA replication	3.61754	0.0235844	subtype1
path:hsa05330	Allograft rejection	3.61754	0.0235844	subtype1
path:hsa03013	RNA transport	2.14197	0.0263841	subtype1
path:hsa00240	Pyrimidine metabolism	2.32556	0.0305008	subtype1
path:hsa05332	Graft-versus-host disease	3.25579	0.0333024	subtype1
path:hsa04620	Toll-like receptor signaling pathway	2.25649	0.0351501	subtype1
path:hsa04940	Type I diabetes mellitus	3.10075	0.0389177	subtype1
path:hsa03420	Nucleotide excision repair	2.89404	0.0482945	subtype1
path:hsa05217	Basal cell carcinoma	4.60954	0.00435057	subtype2
path:hsa04916	Melanogenesis	3.01217	0.0143845	subtype2
path:hsa04530	Tight junction	2.6889	0.0150997	subtype2
path:hsa04120	Ubiquitin mediated proteolysis	2.59076	0.0181885	subtype2
path:hsa03440	Homologous recombination	5.24534	0.0188239	subtype2
path:hsa04340	Hedgehog signaling pathway	3.62178	0.02405	subtype2
path:hsa00250	Alanine, aspartate and glutamate metabolism	4.75359	0.0244873	subtype2
path:hsa03030	DNA replication	4.22541	0.033312	subtype2
path:hsa00790	Folate biosynthesis	6.76066	0.0342573	subtype2
path:hsa00260	Glycine, serine and threonine metabolism	4.11121	0.0357437	subtype2
path:hsa00970	Aminoacyl-tRNA biosynthesis	3.71012	0.0463556	subtype2
path:hsa04330	Notch signaling pathway	5.16145	0.000964111	subtype3
path:hsa04961	Endocrine and other factor-regulated calcium reabsorption	4.66516	0.00165154	subtype3
path:hsa04380	Osteoclast differentiation	2.75668	0.00521286	subtype3
path:hsa05200	Pathways in cancer	1.73632	0.0411008	subtype3
path:hsa04810	Regulation of actin cytoskeleton	1.90714	0.0412501	subtype3
path:hsa04910	Insulin signaling pathway	2.09644	0.0493502	subtype3
path:hsa04144	Endocytosis	2.62804	0.00127449	subtype3
path:hsa04976	Bile secretion	3.82459	0.00221721	subtype3
path:hsa00512	Mucin type O-Glycan biosynthesis	5.39085	0.00597524	subtype3
path:hsa04260	Cardiac muscle contraction	3.19195	0.0109278	subtype3
path:hsa00564	Glycerophospholipid metabolism	2.92275	0.0163979	subtype3
path:hsa05132	Salmonella infection	2.88796	0.0173097	subtype3
path:hsa04964	Proximal tubule bicarbonate reclamation	5.27366	0.0182794	subtype3
path:hsa05100	Bacterial invasion of epithelial cells	2.88796	0.02895	subtype3
path:hsa05140	Leishmaniasis	2.88796	0.02895	subtype3
path:hsa04520	Adherens junction	2.76927	0.0338939	subtype3
path:hsa04360	Axon guidance	2.21109	0.0387926	subtype3
path:hsa00603	Glycosphingolipid biosynthesis - globo series	5.77591	0.0455228	subtype3

## Sheet: GO
Table S3. Partial results of GO enrichment analysis for highly expressed genes of each subtype.
pathID	Description	p-value	subtype
GO:0048002	antigen processing and presentation of peptide antigen	0.00286959	subtype1
GO:0002474	antigen processing and presentation of peptide antigen via MHC class I	0.00297648	subtype1
GO:0009615	response to virus	0.00549521	subtype1
GO:0002821	positive regulation of adaptive immune response	0.00614329	subtype1
GO:0019882	antigen processing and presentation	0.0075688	subtype1
GO:0019885	antigen processing and presentation of endogenous peptide antigen via MHC class I	0.0121492	subtype1
GO:0051607	defense response to virus	0.0208333	subtype1
GO:0002486	antigen processing and presentation of endogenous peptide antigen via MHC class I via ER pathway, TAP-independent	0.0247153	subtype1
GO:0034341	response to type II interferon	0.025682	subtype1
GO:0002476	antigen processing and presentation of endogenous peptide antigen via MHC class Ib	0.0289972	subtype1
GO:0002484	antigen processing and presentation of endogenous peptide antigen via MHC class I via ER pathway	0.0289972	subtype1
GO:0002428	antigen processing and presentation of peptide antigen via MHC class Ib	0.0360704	subtype1
GO:0019883	antigen processing and presentation of endogenous antigen	0.0390802	subtype1
GO:0019884	antigen processing and presentation of exogenous antigen	0.0439611	subtype1
GO:0050864	regulation of B cell activation	0.0454071	subtype1
GO:0002711	positive regulation of T cell mediated immunity	0.0488917	subtype1
GO:0002716	negative regulation of natural killer cell mediated immunity	0.049831	subtype1
GO:0006302	double-strand break repair	0.00402682	subtype2
GO:0006397	mRNA processing	0.00938399	subtype2
GO:0006310	DNA recombination	0.0189018	subtype2
GO:0008380	RNA splicing	0.0450523	subtype2
GO:0043484	regulation of RNA splicing	0.0455345	subtype2
GO:0030316	osteoclast differentiation	0.00522772	subtype3
GO:0030073	insulin secretion	0.00710208	subtype3
GO:0051056	regulation of small GTPase mediated signal transduction	0.00730256	subtype3
GO:0007265	Ras protein signal transduction	0.013439	subtype3
GO:0060562	epithelial tube morphogenesis	0.013439	subtype3
GO:0010770	positive regulation of cell morphogenesis involved in differentiation	0.0141587	subtype3
GO:0009306	protein secretion	0.0164228	subtype3
GO:0002064	epithelial cell development	0.0361068	subtype3
GO:0016049	cell growth	0.0473265	subtype3
GO:0002761	regulation of myeloid leukocyte differentiation	0.0474915	subtype3
GO:1902105	regulation of leukocyte differentiation	0.0523625	subtype3
