# Supplementary material for: Multifactor assessment of ovarian cancer reveals immunologically interpretable molecular subtypes with distinct prognoses
Source: Front Immunol. 2023 Dec 7;14:1326018. doi: 10.3389/fimmu.2023.1326018 (PMC10740166; doi:10.3389/fimmu.2023.1326018)
Supplement: Supplementary file 5 [file Table_4.xlsx]

## Sheet: Sheet1
Table S4. Immune characteristics analysis of 426 samples in TCGA.
Mixture	B cells naive	B cells memory	Plasma cells	T cells CD8	T cells CD4 naive	T cells CD4 memory resting	T cells CD4 memory activated	T cells follicular helper	T cells regulatory (Tregs)	T cells gamma delta	NK cells resting	NK cells activated	Monocytes	Macrophages M0	Macrophages M1	Macrophages M2	Dendritic cells resting	Dendritic cells activated	Mast cells resting	Mast cells activated	Eosinophils	Neutrophils	P-value	Correlation	RMSE
TCGA.04.1331.01	0.0260739	0	0	0.0591963	0	0.0804457	0	0.061479	0	0	0	0	0.111827	0	0	0	0.109289	0.0066789	0.24833	0	0.296681	0	0.799	-0.0323041	1.03706
TCGA.04.1332.01	0.0619062	0	0	0.109878	0	0.089493	0	0.0540548	0	0	0.0575609	0	0.0762261	0	0	0.115783	0.105764	0.0169792	0.180792	0	0.131563	0	0.754	-0.0034064	1.0402
TCGA.04.1337.01	0.0802621	0	0	0.240589	0	0.0166839	0	0	0.00320308	0	0.033964	0.00356596	0.131851	0	0.00967069	0	0.262681	0	0.148734	0	0.0687957	0	0.617	0.068955	1.02376
TCGA.04.1338.01	0.117784	0	0	0.112474	0	0.106603	0	0.0226765	0	0.0509094	0	0	0.0188804	0.00509803	0.175207	0	0.10369	0	0.141392	0	0.145285	0	0.229	0.375935	0.931167
TCGA.04.1341.01	0.0226171	0	0.00629685	0.0518643	0	0.15929	0	0.0250542	0	0	0	0.0327272	0.137843	0	0	0	0.100246	0	0.209222	0	0.25484	0	0.733	0.0117482	1.03601
TCGA.04.1343.01	0.249814	0	0.0201308	0.169749	0	0.0754954	0	0.00756221	0.0159528	0	0	0.172294	0	0.0513143	0	0	0.0670372	0.0109179	0	0	0.137203	0.0225296	0.427	0.199318	1.00561
TCGA.04.1347.01	0.1372	0	0	0.057798	0	0.152225	0	0.108613	0	0	0	0	0	0	0	0	0.142527	0	0.153841	0	0.247796	0	0.99	-0.15698	1.12242
TCGA.04.1348.01	0.255342	0	0.0179924	0.0313507	0	0.0752304	0	0.0278636	0.0858384	0	0	0	0.051252	0.105538	0.0968711	0.0647458	0.0731582	0	0.0405767	0	0.07424	0	0.142	0.490466	0.862386
TCGA.04.1350.01	0.033288	0	0	0.125274	0	0.0228383	0	0.00238049	0	0	0	0.0582979	0.205705	0	0.00209386	0	0.168893	0	0.154767	0	0.226463	0	0.802	-0.0335031	1.03259
TCGA.04.1356.01	0.0451019	0	0	0.178904	0	0.144006	0	0.0448005	0.0658328	0	0.157598	0.00328829	0	0	0.00838338	0.0284786	0.0994507	0.0112125	0.136441	0	0	0.0765014	0.895	-0.0781837	1.12871
TCGA.04.1357.01	0.371782	0	0.0222948	0	0	0.0257616	0	0.126635	0.0482619	0	0	0	0	0.100584	0.0707685	0	0.0344004	0	0	0	0.182481	0.0170301	0.053	0.722057	0.702429
TCGA.04.1361.01	0.219342	0	0	0.0288916	0	0.0224299	0	0.123445	0.0630669	0	0	0.0355532	0.0250541	0	0	0	0.0392675	0.147269	0.12469	0	0.170992	0	0.401	0.223474	0.981171
TCGA.04.1362.01	0.0593401	0	0	0.0597754	0	0.0578916	0	0.0445286	0	0	0	0.043513	0.177094	0	0	0	0.101367	0.0441164	0.215756	0	0.196618	0	0.761	-0.0111111	1.02764
TCGA.04.1364.01	0.0868987	0	0	0.06457	0	0.0560912	0	0.0475259	0	0	0	0.0197985	0.130477	0	0	0	0.105631	0	0.144195	0	0.344814	0	0.999	-0.218282	1.08515
TCGA.04.1365.01	0.0975723	0	0	0.162375	0	0.0737338	0	0.0771899	0.0625916	0	0	0.131108	0.0459806	0	0.104347	0	0.0739132	0	0.112937	0.0294573	0	0.0287944	0.407	0.217217	0.994537
TCGA.04.1514.01	0.0366422	0	0	0.0167432	0	0.0187525	0	0.139474	0	0	0.0255952	0.0248775	0.106015	0	0	0	0.043637	0	0.221523	0	0.366741	0	0.977	-0.13469	1.05592
TCGA.04.1517.01	0.0301902	0	0	0.105982	0	0.0872052	0	0.0450657	0	0	0.0387007	0	0.0722417	0	0	0.0548438	0.0439995	0.000409546	0.315214	0	0.206148	0	0.749	4.48676e-05	1.03501
TCGA.04.1519.01	0.033701	0	0	0.103959	0	0.0578351	0	0.0497934	0	0	0.0548828	0	0.101892	0	0	0.0463809	0.132002	0.0111179	0.232036	0	0.1764	0	0.66	0.0414407	1.01994
TCGA.04.1530.01	0.151096	0	0.00239907	0.108859	0	0.152026	0	0	0	0	0	0.059929	0.106423	0.000738202	0.146899	0	0.118685	0	0.13602	0	0.0169247	0	0.254	0.350891	0.938668
TCGA.04.1536.01	0.0746776	0	0	0.0881568	0	0.11108	0	0.12795	0	0.00286788	0.0153497	0	0.0677762	0	0	0	0.191954	0.00594138	0.181828	0	0.132418	0	0.717	0.0189088	1.05112
TCGA.04.1542.01	0.0192025	0	0	0.0961767	0	0.102723	0	0.052583	0	0	0.0557814	0	0.105305	0	0	0.0463403	0.0986892	0	0.226112	0	0.197086	0	0.645	0.0521943	1.02459
TCGA.04.1648.01	0.248628	0	0.00553049	0.0323497	0	0.0757817	0	0.160991	0	0	0	0	0.0375776	0.0124009	0	0	0.0443147	0.0863171	0.0372117	0	0.183641	0.0752561	0.453	0.175537	1.01663
TCGA.04.1651.01	0	0	0	0	0	0	0	0.0274432	0	0.0186484	0.046427	0	0	0	0	0.00293312	0.0320599	0.365441	0.239056	0	0.267991	0	0.404	0.220717	0.989853
TCGA.04.1655.01	0.0445815	0	0	0.161686	0	0.0763595	0	0.00936409	0.0184259	0	0.00585257	0	0.0723108	0	0	0.0626431	0.127709	0.00369762	0.310114	0	0.107256	0	0.635	0.0592293	1.02286
TCGA.09.0364.01	0.0329903	0	0	0.142801	0	0.0854734	0	0.0229283	0	0	0.00493475	0	0.161027	0	0	0	0.421811	0	0.0638552	0	0.0641789	0	0.65	0.0497398	1.02926
TCGA.09.0366.01	0.00478562	0	0	0.0915953	0	0.0830268	0.0142847	0.0336847	0.00088691	0	0	0.0396813	0.182557	0.097148	0	0	0.0773401	0.00938322	0.190161	0	0.0366763	0.138789	0.63	0.0621989	1.02646
TCGA.09.0367.01	0.0436158	0	0	0.0553716	0	0.0911307	0	0.0462761	0	0	0	0.0747496	0.247145	0	0	0	0.112362	0.0893738	0.123108	0	0.116866	0	0.644	0.0530361	1.01821
TCGA.09.0369.01	0.0649546	0	0	0.00431254	0	0.172099	0.104412	0	0.0346555	0	0	0	0.0933542	0	0	0.0230983	0.198089	0	0.167379	0	0.137646	0	0.76	-0.0100023	1.0442
TCGA.09.1659.01	0.109918	0	0	0.0590944	0	0.058166	0	0.0696424	0	0.00476475	0	0.0721734	0.149402	0	0	0	0.0513064	0.121119	0.182887	0	0.121526	0	0.659	0.0422385	1.02462
TCGA.09.1661.01	0.0521331	0	0	0.076455	0	0.0797625	0	0	0.00538772	0	0	0.017825	0.176273	0	0	0	0.136223	0	0.227554	0	0.228387	0	0.716	0.0195859	1.0229
TCGA.09.1662.01	0.042827	0	0	0.127419	0	0.133406	0	0.00513182	0	0	0.02141	0.0320178	0.144434	0	0	0.0206859	0.124357	0	0.245703	0	0.102609	0	0.617	0.0691663	1.02514
TCGA.09.1665.01	0.0770307	0	0	0	0	0	0	0	0	0.139364	0	0.381274	0	0	0.0960513	0	0	0.101126	0.205154	0	0	0	0.301	0.308332	0.94305
TCGA.09.1666.01	0.15391	0	0	0.132999	0	0.0571193	0	0.0688107	0.0428202	0.0618513	0	0.101158	0.0881954	0	0.209648	0	0.0254119	0.0328764	0.0251998	0	0	0	0.106	0.579215	0.823372
TCGA.09.1667.01	0.451003	0	0.0233567	0	0	0.00637951	0	0.142146	0.0162336	0.0464224	0	0.0582476	0.0348463	0.0142745	0.109	0	0.0438341	0.0542559	0	0	0	0	0.105	0.584497	0.819667
TCGA.09.1668.01	0.0715602	0	0	0.10085	0	0.0794507	0	0.0221755	0.0478164	0	0.0345569	0	0.0282047	0	0.166589	0	0.0782427	0	0.210881	0.0214217	0.138251	0	0.19	0.420188	0.90033
TCGA.09.1669.01	0.322382	0	0.0357401	0.0579409	0	0.0957177	0	0.0498611	0	0	0	0.0925845	0	0.0251865	0.0646424	0	0.096447	0	0.0894619	0	0.0700363	0	0.134	0.503578	0.854547
TCGA.09.1670.01	0.0382379	0	0	0.0656874	0	0.0695374	0	0.0138592	0.0363618	0	0	0.0210929	0.132259	0	0	0.0481369	0.0767885	0.0151414	0.238785	0	0.244113	0	0.64	0.0563454	1.01212
TCGA.09.1673.01	0.020674	0	0	0.13357	0	0.0113933	0.036409	0.084584	0	0	0	0.274487	0.140533	0	0	0	0.0790225	0.00328993	0.121778	0	0.0942587	0	0.626	0.0639447	1.01576
TCGA.09.1674.01	0.0799299	0	0	0.0199754	0	0.0579389	0	0.0773	0	0.0046248	0	0	0.159628	0	0	0	0.0813055	0	0.243392	0	0.275905	0	0.998	-0.205012	1.0757
TCGA.09.2044.01	0.0603635	0	0	0.124688	0	0.0722376	0	0	0.103495	0	0	0.114046	0.107756	0	0.0262268	0.103896	0	0	0.133128	0.032825	0	0.121338	0.578	0.0903392	1.02082
TCGA.09.2045.01	0.000674243	0	0	0.126004	0	0.01868	0	0.218249	0	0	0.0290129	0	0	0	0	0	0.0354816	0.247871	0.138405	0	0.185622	0	0.716	0.0200315	1.08131
TCGA.09.2048.01	0.0371879	0	0	0.172592	0	0.185613	0	0	0	0	0.149291	0	0.0551024	0	0	0	0.16894	0	0.188303	0	0.0429721	0	0.687	0.0329896	1.06639
TCGA.09.2051.01	0.0819359	0	0	0.083986	0	0.000976923	0	0.146297	0	0.0482128	0	0.048976	0.0414951	0	0	0.0510962	0.0252563	0.24234	0.114133	0	0.115295	0	0.277	0.331618	0.933998
TCGA.09.2053.01	0.124245	0	0.0555879	0.0788917	0	0.089109	0.000733963	0.0152486	0	0.0765594	0	0.0600212	0	0.0290128	0.0885703	0.0108991	0.104877	0	0.0762298	0	0.190014	0	0.366	0.255206	0.965641
TCGA.09.2054.01	0.116973	0	0.035415	0.0511278	0	0.0857143	0	0.066175	0	0.0476808	0	0	0.0625872	0	0	0.142908	0.0894869	0	0.143679	0	0.158252	0	0.551	0.107088	1.00914
TCGA.09.2056.01	0.0352618	0	0	0.0846518	0	0.0490496	0	0.00555441	0.0447111	0	0	0.0850013	0.166856	0.204056	0	0	0.120253	3.4298e-05	0.106308	0	0.0344219	0.0638401	0.566	0.0961162	1.00665
TCGA.10.0926.01	0.014115	0	0	0.205047	0	0.0409648	0	0.0279657	0	0	0	0.0999985	0.141611	0	0	0	0.20959	0	0.108125	0	0.152583	0	0.634	0.0597969	1.02668
TCGA.10.0927.01	0.0725474	0	0	0.157139	0	0.016706	0	0.0564406	0	0.0051052	0	0.0463797	0.139704	0	0	0	0.181546	0	0.169509	0	0.154923	0	0.676	0.0360105	1.02633
TCGA.10.0928.01	0.0466067	0	0	0.0833825	0	0.0515794	0	0.0385289	0	0	0	0	0.213515	0	0	0	0.12133	0	0.177614	0.0373914	0.230053	0	0.92	-0.0897324	1.05128
TCGA.10.0931.01	0.0882668	0	0	0.0810644	0	0.0271857	0.0135734	0.132083	0.0248428	0	0	0.14105	0.0286112	0	0	0	0.113557	0.296404	0.0331606	0.0202012	0	0	0.571	0.0942001	1.0455
TCGA.10.0933.01	0.0703969	0	0	0.086368	0	0.0862478	0	0.0559068	0	0.0185309	0	0	0.0768614	0	0	0	0.136175	0.0377278	0.201495	0	0.23029	0	0.853	-0.0604231	1.05442
TCGA.10.0934.01	0	0	0	0	0	0	0	0.141104	0	0	0.107233	0	0	0.14577	0	0	0.170234	0	0	0	0.435659	0	0.978	-0.139011	1.04865
TCGA.10.0936.01	0.433959	0	0.0319113	0.0400181	0	0.109032	0	0.056927	0.0661146	0	0	0.059093	0	0.126036	0.000190736	0	0.0431153	0.0221279	0	0	0.0114748	0	0.084	0.630875	0.768354
TCGA.10.0937.01	0.17293	0	0	0.111191	0	0	0	0.104487	0.017617	0.0793316	0	0	0.128963	0	0	0.0583082	0.0964856	0.0508204	0.179866	0	0	0	0.643	0.0536243	1.03594
TCGA.10.0938.01	0.0805848	0	0	0.0460144	0	0.0696377	0	0.0729796	0	0.0274472	0	0	0.110972	0	0	0	0.105531	0	0.165477	0	0.321357	0	0.999	-0.238356	1.09583
TCGA.13.0714.01	0.350233	0	0.0176066	0.0337524	0	0.0755193	0	0.0727553	0.024536	0	0	0	0.0278919	0.142883	0	0.0125158	0.0748121	0	0.0793578	0	0.0881373	0	0.073	0.656375	0.755904
TCGA.13.0720.01	0.0742353	0	0.00771948	0.0578987	0	0.00498114	0	0.154506	0	0.114407	0.0892925	0	0.0202223	0.104589	0	0	0.0186024	0.266228	0	0	0.0873181	0	0.406	0.21863	0.986693
TCGA.13.0724.01	0.140176	0	0	0.03842	0	0.0984226	0	0.0892353	0	0	0	0	0.179035	0	0	0	0.0752452	0.00541885	0.159846	0	0.214201	0	0.894	-0.0777778	1.07359
TCGA.13.0725.01	0.262206	0	0.00782607	0.0868886	0	0.0459435	0	0.0665651	0	0	0	0.209961	0	0	0	0	0.0550956	0.0162682	0.0846878	0	0.125648	0.0389098	0.371	0.250434	0.973326
TCGA.13.0726.01	0.0405269	0	0	0.137359	0	0.0302942	0	0	0	0	0	0.0446135	0.158223	0	0	0	0.159812	0	0.187479	0	0.241692	0	0.659	0.0429662	1.01685
TCGA.13.0727.01	0.0451973	0	0	0.213041	0	0.104058	0	0	0	0	0	0.0525045	0.112937	0	0	0	0.200209	0	0.144306	0	0.121898	0.00585005	0.636	0.0591406	1.0401
TCGA.13.0730.01	0.0250393	0	0	0.0478808	0	0.0645301	0	0.0388093	0.000285648	0	0	0.0104484	0.0806405	0	0	0.16953	0.049701	0.0927835	0.195261	0	0.22509	0	0.79	-0.0257329	1.02658
TCGA.13.0760.01	0.269858	0	0.0734956	0	0	0	0.124239	0.245634	0	0.127925	0	0	0.00979383	0.0268225	0.00242199	0.0834765	0.00281514	0	0	0	0.0335182	0	0.234	0.368336	0.940912
TCGA.13.0762.01	0.251262	0	0	0.111874	0	0.0891438	0	0.154726	0	0	0.0478796	0	0	0	0	0	0.135991	0	0.194123	0	0.0150009	0	0.978	-0.138191	1.16139
TCGA.13.0765.01	0.10973	0	0	0.100031	0	0.0601934	0	0.022301	0.0251366	0	0	0.0241625	0.0358854	0.0848562	0	0	0.157381	0.00679136	0.120689	0	0.252841	0	0.586	0.085197	1.01272
TCGA.13.0766.01	0.063271	0	0	0.0576962	0	0.12072	0	0.0590961	0.00621375	0	0	0.0309773	0.129821	0	0	0	0.178972	0.0722674	0.236253	0	0.0447126	0	0.736	0.00831945	1.03607
TCGA.13.0768.01	0.306779	0	0.0522593	0.0618172	0	0.0612799	0	0.130182	0.0321036	0.03357	0	0	0	0.0442726	0.0808362	0	0.00426242	0.16789	0	0	0.0247475	0	0.042	0.741844	0.689069
TCGA.13.0795.01	0.170132	0	0	0.124333	0	0.151375	0	0	0.0051515	0.0203614	0	0.0359006	0.141412	0	0.0147879	0	0.129925	0	0.17919	0	0	0.027433	0.717	0.0194598	1.06377
TCGA.13.0797.01	0.299916	0	0.0234536	0	0	0	0	0.099691	0	0	0	0	0.0164532	0.0164658	0	0	0.0538309	0.375032	0	0	0.115157	0	0.114	0.546546	0.833276
TCGA.13.0799.01	0.120484	0	0	0.0353198	0	0.0795411	0	0.0682073	0	0.197088	0	0	0.162434	0	0.0132204	0	0.0734825	0.0334758	0.115934	0	0.100814	0	0.629	0.0624208	1.032
TCGA.13.0800.01	0.0981802	0	0	0.114215	0	0.106975	0	0.112446	0	0	0.0687335	0	0.0786284	0	0	0	0.152037	0	0.249014	0	0.019771	0	0.937	-0.101699	1.09786
TCGA.13.0801.01	0.378757	0	0.0412218	0.0343178	0	0.0630804	0.0445892	0.0382748	0.00281043	0.0174257	0	0.0952415	0	0.00586079	0.0172323	0.123659	0.0597196	0.0628167	0	0	0	0.0149931	0.157	0.469601	0.877785
TCGA.13.0804.01	0.0492902	0	0	0.132463	0	0.0139086	0	0.0601038	0.0181549	0	0	0.0987403	0.187669	0.194439	0	0	0.12225	0.0175961	0.0795748	0	0	0.0258101	0.762	-0.0121253	1.03932
TCGA.13.0883.01	0.0588045	0	0	0.116213	0	0.0848947	0	0.0162724	0.0129641	0	0	0.0286741	0.0943256	0.0055042	0	0.04167	0.127257	0	0.244833	0	0.168587	0	0.616	0.0708759	1.01574
TCGA.13.0884.01	0.109433	0	0	0.103409	0	0.084561	0	0.0116186	0.0176647	0.013028	0	0.101552	0.0763194	0	0.0066404	0	0.0974875	0.0222678	0.191719	0	0.164299	0	0.619	0.0672041	1.01818
TCGA.13.0885.01	0.225286	0	0.0028184	0.0788401	0	0.0720201	0	0.0229186	0.120934	0.0886942	0	0.0491522	0.0285006	0.0228849	0.232057	0	0.0558939	0	0	0	0	0	0.035	0.762516	0.668886
TCGA.13.0886.01	0.299014	0	0.027316	0.0510816	0	0.0448629	0	0.0781195	0.0804521	0.105599	0	0.0757336	0.00239345	0.0216873	0.0234418	0	0.0428964	0.144286	0	0	0.00311701	0	0.234	0.368393	0.937419
TCGA.13.0887.01	0.0635303	0	0	0	0	0	0	0.0533893	0	0.00823682	0	0.155577	0.0497229	0	0	0.0671462	0.0675745	0.297875	0.175182	0	0.0617661	0	0.344	0.274056	0.955625
TCGA.13.0888.01	0.0401117	0	0	0.165926	0	0.0501773	0	0.0182018	0	0	0	0.0610326	0.248967	0	0	0	0.18784	0	0.147842	0	0.0799018	0	0.748	0.000546264	1.03964
TCGA.13.0890.01	0.165998	0	0.0113818	0.172247	0	0.0299502	0	0	0.0119762	0	0	0.156391	0.104109	0	0.0074287	0.0324259	0.159272	0	0.0736033	0	0.0752162	0	0.528	0.126425	1.00691
TCGA.13.0891.01	0.0360903	0	0	0.076406	0	0.0874499	0	0.0225595	0.0113964	0	0	0.0358106	0.126669	0	0.000469079	0.0733803	0.0588113	0.042189	0.298145	0	0.130623	0	0.816	-0.0422526	1.03687
TCGA.13.0893.01	0.067732	0	0	0.137857	0	0.0896266	0	0.0116383	0.071753	0	0.0152405	0.0616144	0	0	0.0203348	0	0.114447	0.0429138	0.126756	0	0.240086	0	0.593	0.0824332	1.02377
TCGA.13.0897.01	0.0995563	0	0	0.106859	0	0.0709589	0	0	0.040193	0	0	0	0.0777001	0	0.0397575	0	0.147234	0	0.184912	0	0.232829	0	0.624	0.0646092	1.01633
TCGA.13.0899.01	0.0266235	0	0	0.098751	0	0.127817	0.00029286	0	0.034867	0	0	0.0969353	0.108039	0	0.00120107	0.0224223	0.157586	0	0.220552	0	0.0352373	0.0696751	0.77	-0.016533	1.04907
TCGA.13.0900.01	0.025847	0	0	0	0.0213565	0	0	0.00163856	0	0.012843	0	0.0855406	0.0753915	0	0.0743481	0	0.0589809	0.0349836	0.324979	0	0.284092	0	0.411	0.213557	0.971367
TCGA.13.0901.01	0.0707897	0	0	0	0	0.0397225	0	0	0	0.216429	0	0.245602	0	0	0.00353714	0.0070544	0	0.00265547	0.307067	0.0289807	0.0781621	0	0.992	-0.16132	1.0566
TCGA.13.0905.01	0.0746097	0	0	0.107218	0	0	0	0.175053	0	0.0803081	0	0.037224	0.0480933	0	0	0	0	0.247795	0.144299	0	0.0853993	0	0.441	0.190333	0.999001
TCGA.13.0906.01	0.0711201	0	0	0.0724454	0	0.0707088	0	0.0468924	0	0	0	0.0705285	0.149025	0	0.0216985	0.00846046	0.108527	0	0.25086	0	0.129735	0	0.733	0.0116074	1.02374
TCGA.13.0908.01	0.0975513	0	0.000236682	0.192044	0	0.0188087	0	0.00951951	0.0198788	0	0	0.104806	0.179475	0	0.00495913	0.00552204	0.161573	0	0.180882	0	0	0.0247439	0.639	0.0572781	1.02408
TCGA.13.0911.01	0.446123	0	0.0224046	0.0177778	0	0.052777	0	0.0721608	0.0806705	0.00292464	0	0.104812	0.0207628	0.0448026	0.00429649	0.00208401	0.0662333	0.0369185	0.0182954	0.00695628	0	0	0.182	0.428194	0.917335
TCGA.13.0913.02	0.365549	0	0.0178222	0.065226	0	0.0649217	0	0.0130527	0.0794691	0.101834	0	0.0852141	0	0	0.0441283	0	0	0.162783	0	0	0	0	0.109	0.570164	0.820688
TCGA.13.0916.01	0.141261	0	0	0.113102	0	0.0807472	0	0	0.095276	0	0	0.0902497	0.104772	0	0.0748934	0	0.118972	0	0.130387	0	0.0503395	0	0.354	0.263583	0.961113
TCGA.13.0919.01	0.0486276	0	0	0.0568354	0	0.044623	0.0141757	0	0.114445	0	0	0.0442275	0.224412	0	0.0207174	0.0179815	0.0905721	0.0228769	0.218656	0	0.0818496	0	0.607	0.0759154	1.00814
TCGA.13.0920.01	0.34091	0	0.0369964	0.0495312	0	0.0753554	0	0.0689223	0	0	0	0.118649	0	0	0.0108367	0	0.0827078	0	0.113563	0	0.102528	0	0.171	0.444668	0.888769
TCGA.13.0923.01	0.0563686	0	0	0.150415	0	0.00101313	0	0.224049	0	0.022216	0	0.0431847	0	0	0	0	0	0.268038	0.154532	0.0053548	0.0748287	0	0.422	0.204719	1.00699
TCGA.13.0924.01	0.232948	0	0.0105544	0.0745284	0	0.132171	0	0	0.0230998	0	0	0	0.122292	0	0.117638	0	0.0805131	0	0.0861622	0.0114345	0.0830199	0.0256381	0.228	0.378633	0.924261
TCGA.13.1403.01	0.0625149	0	0	0.0614536	0	0	0	0.0493239	0.0178797	0	0.00746046	0.11285	0.148143	0	0	0	0.110798	0.0202693	0.176603	0	0.232705	0	0.739	0.00513424	1.01847
TCGA.13.1404.01	0.468206	0	0.0160573	0.0457666	0	0.10885	0	0.0148883	0.0755837	0	0	0.0426249	0	0.114693	0.00779344	0	0.0856665	0	0	0	0.0198704	0	0.067	0.672892	0.731937
TCGA.13.1405.01	0.0565454	0	0	0.0976942	0	0.0984024	0	0.0450217	0.0154248	0	0	0.0214926	0.0957847	0	0.00899244	0.00840544	0.109428	0	0.228312	0	0.214497	0	0.618	0.0673285	1.01927
TCGA.13.1407.01	0.0610712	0	0	0.121326	0	0.0806143	0.000575357	0.0437156	0	0	0	0.12989	0.162688	0	0	0	0.144116	0	0.149168	0	0.106836	0	0.841	-0.0542141	1.05569
TCGA.13.1408.01	0.187701	0	0.0461141	0.0498205	0	0.107213	0	0	0.0388583	0	0	0	0.038223	0	0.0349478	0	0.11694	0	0.13339	0	0.246792	0	0.41	0.214787	0.980563
TCGA.13.1409.01	0.0170282	0	0	0.113276	0	0.100075	0	0.0472134	0	0	0.0646149	0.0074804	0.0683191	0	0	0.0380541	0.126568	0	0.226594	0	0.190777	0	0.646	0.0509783	1.02652
TCGA.13.1410.01	0.017827	0	0	0	0	0	0	0	0.019554	0.0103972	0	0.183669	0.207311	0	0.030668	0.0249857	0.00671211	0.0318042	0.311482	0	0.15559	0	0.274	0.33491	0.952002
TCGA.13.1411.01	0.0849406	0	0.00941603	0.120456	0	0.190803	0	0	0.0500609	0	0	0	0.047109	0.0333149	0.0717558	0	0.114393	0	0.169674	0	0.103163	0.00491468	0.338	0.277113	0.962382
TCGA.13.1477.01	0.0332672	0	0	0.15182	0	0.097749	0	0.00156615	0	0	0.013684	0.0188727	0.157661	0	0.000584499	0	0.321496	0	0.149785	0	0.0535152	0	0.621	0.0658282	1.02448
TCGA.13.1481.01	0.419094	0	0.0436492	0.04631	0	0.108076	0	0.0317159	0.0428549	0	0	0	0	0.0901306	2.30801e-05	0.0250882	0.0851715	0	0.0141901	0	0.093696	0	0.056	0.713493	0.696178
TCGA.13.1482.01	0.0579041	0	0	0.0101912	0	0.0166085	0	0.059644	0	0.00625015	0.0825782	0	0.220768	0	0	0	0.029371	0.0670278	0.168525	0	0.281132	0	0.529	0.125907	0.992758
TCGA.13.1483.01	0.0714359	0	0	0.141648	0	0.0645114	0	0.0842256	0.0323388	0	0	0.065259	0.0259236	0	7.71637e-05	0	0.0789589	0.330304	0.091873	0.0134453	0	0	0.439	0.191363	1.02227
TCGA.13.1485.01	0.0382137	0	0	0.119822	0	0.0680089	0	0.0315184	0	0	0	0	0.10415	0	0	0.0396622	0.134525	0	0.26362	0	0.200479	0	0.659	0.0427968	1.02123
TCGA.13.1487.01	0.0664086	0	0	0.110645	0	0.0703269	0	0.0200947	0.0369335	0	0.0387999	0	0.0941376	0	0	0.0426213	0.112499	0.0217963	0.216566	0	0.169171	0	0.712	0.0218078	1.02982
TCGA.13.1488.01	0.221916	0	0.0145514	0.130708	0	0.034919	0	0.146609	0	0.158208	0	0.0170933	0.0210987	0	0.0574627	0	0	0.197434	0	0	0	0	0.203	0.400169	0.929127
TCGA.13.1489.02	0.0114391	0	0	0.0941567	0	0.0532301	0	0.0676598	0.0272472	0	0.031774	0	0.0784132	0.0295741	0	0.0171469	0.0836397	0.15399	0.221173	0	0.130556	0	0.602	0.0781205	1.0183
TCGA.13.1489.01	0.0282076	0	0	0.0599362	0	0.0538036	0	0.0143742	0.0730929	0	0.0506623	0	0.127256	0	0	0.0879609	0.0655226	0	0.259355	0	0.179829	0	0.956	-0.116844	1.05358
TCGA.13.1492.01	0.0594223	0	0	0.0823304	0	0.101608	0	0.116355	0	0	0.0387029	0	0.0949203	0	0	0	0.0878477	0	0.248222	0	0.170591	0	0.998	-0.20422	1.11366
TCGA.13.1495.01	0.07142	0	0	0.0487757	0	0.0253276	0	0.132547	0	0	0.0449676	0	0.228486	0.0782687	0.0239	0	0.0126336	0.0435305	0.036155	0	0.253988	0	0.889	-0.0759907	1.05861
TCGA.13.1496.01	0.228897	0	0.0321693	0	0	0	0	0.102294	0	0.16207	0	0.219836	0.0602463	0	0.0282809	0.00142101	0	0.108193	0.0484844	0	0	0.00810886	0.332	0.283205	0.958906
TCGA.13.1497.01	0.560432	0	0.0594099	0	0	0.0141379	0.00369872	0.135258	0	0	0	0.106334	0	0	0.0113176	0	0.023041	0.0423016	0	0	0.044069	0	0.099	0.59354	0.826084
TCGA.13.1498.01	0.0632061	0	0	0.157331	0	0.0775133	0	0.0643203	0.00998904	0.0144137	0	0.126053	0.101402	0	0.0681291	0	0.0983037	0.0451575	0.136675	0.0130916	0.0244152	0	0.449	0.184105	0.993485
TCGA.13.1499.01	0.45013	0	0.0326209	0.0573945	0	0.107826	0	0.0421519	0.0622505	0	0	0	0	0.0919259	0.0305973	0	0.0804153	0	0	0	0.0446879	0	0.084	0.632446	0.769569
TCGA.13.1501.01	0.0716331	0	0.00823465	0.0734638	0	0.102107	0	0.0288986	0.0121525	0	0.0203777	0	0.0677038	0	0	0.0430647	0.0492793	0	0.303975	0	0.219109	0	0.749	-2.6707e-05	1.03358
TCGA.13.1505.01	0.136326	0	0.00648277	0.113898	0	0.0823849	0	0.0225034	0.00362925	0	0	0.0790987	0.184379	0	0.00167811	0	0.149949	0	0.129521	0	0.0901497	0	0.585	0.0858146	1.01992
TCGA.13.1506.01	0.0247311	0	0.00954424	0.054948	0	0.0253903	0	0.0767871	0.108889	0.000604401	0.00308735	0	0	0	0	0	0.103268	0.254005	0.130027	0	0.208718	0	0.576	0.0914426	1.03084
TCGA.13.1507.01	0.170587	0	0.0361399	0.0873618	0	0	0	0.0230966	0.0231255	0.0515641	0	0.0202375	0.0718497	0.00247266	0.0302271	0.245884	0.077244	0	0.108029	0	0.0521807	0	0.434	0.195127	0.978808
TCGA.13.1509.01	0.495969	0	0.0431919	0.0708521	0	0.105067	0	0.099367	0	0	0	0	0	0.102921	0	0	0.0327997	0	0	0	0.0498332	0	0.063	0.681706	0.728828
TCGA.13.1510.01	0.140269	0	0	0.065287	0	0.0848583	0	0.0376362	0.0135293	0	0	0.0458679	0.0939135	0	0.027926	0	0.0876371	0	0.157149	0	0.245926	0	0.736	0.00846766	1.03713
TCGA.13.1511.01	0	0	0	0.0202695	0	0	0	0.106342	0	0.00913361	0.0695525	0	0.08465	0.0412302	0	0.0518742	0.00603798	0.27526	0.138201	0	0.197449	0	0.213	0.39065	0.911003
TCGA.13.1512.01	0.233854	0	0	0	0	0	0.0196782	0.00170909	0.0255324	0.0861795	0	0.319116	0.0122095	0	0.103121	0	0	0.0576058	0.091914	0	0.0490817	0	0.575	0.0919051	1.04471
TCGA.13.2060.01	0.327446	0	0.0286919	0	0	0.0487355	0.00776609	0.0323073	0	0.0981073	0	0.154893	0.0305195	0	0.183541	0	0.0879931	0	0	0	0	0	0.111	0.555198	0.837189
TCGA.13.A5FT.01	0.326414	0	0.017389	0	0	0	0	0.0504391	0.0489612	0	0	0.0756379	0.115929	0.0402737	0	0.0521306	0.0694735	0.0936231	0.0334822	0	0.0762474	0	0.214	0.389439	0.913344
TCGA.20.0987.01	0.474735	0	0.0657244	0	0	0.0659745	0.0113009	0.0146645	0.0629574	0	0	0.119634	0.0278453	0.0514116	0.0259648	0	0.0343213	0.0250065	0	0	0.0204591	0	0.032	0.770502	0.637946
TCGA.20.0991.01	0.119007	0	0.103953	0.0365861	0	0.128824	0.0727367	0	0.0547499	0	0	0.096763	0	0.061011	0.205719	0	0.0544983	0	0	0	0	0.066151	0.023	0.798884	0.6401
TCGA.20.1682.01	0.31612	0	0.012331	0.0470105	0	0.0869731	0	0.0857763	0	0	0	0	0	0.011484	0.057464	0	0.0833931	0	0.0984783	0	0.20097	0	0.147	0.483693	0.865041
TCGA.20.1683.01	0	0.275721	0.0712534	0	0	0	0	0	0.0450202	0	0	0.0502733	0.0307544	0	0	0.0829667	0.0319108	0.0444454	0.155576	0	0.212079	0	0.234	0.36862	0.920424
TCGA.20.1684.01	0.0740231	0	0	0.0307268	0	0.0818482	0	0.113693	0	0	0.0238946	0	0.0982034	0	0	0	0.0576762	0	0.23907	0	0.280865	0	0.999	-0.242677	1.10144
TCGA.20.1685.01	0.0684192	0	0	0.116126	0	0.159752	0	0	0.00196006	0	0	0.0952326	0.0529003	0	0.0315729	0	0.129305	0	0.188646	0	0.0962426	0.0598435	0.687	0.0330038	1.04044
TCGA.20.1686.01	0.0730586	0	0	0	0	0	0.0993288	0.195362	0	0.106642	0	0.344256	0	0	0.000645032	0	0.0779468	0.0366964	0.0465523	0.0195133	0	0	0.994	-0.170112	1.08753
TCGA.20.1687.01	0.0892778	0	0.00475063	0.0517387	0	0.063043	0	0.0420664	0.0556623	0	0.0529418	0	0.10628	0	0	0.0236907	0.0714981	0.0158257	0.2203	0	0.202925	0	0.754	-0.00323123	1.03446
TCGA.23.1021.01	0.0731319	0	0	0.084031	0	0.0149436	0	0.0267639	0.0040601	0	0	0.0670349	0.177079	0	0	0	0.141373	0	0.227927	0	0.183655	0	0.733	0.0115414	1.0201
TCGA.23.1022.01	0.0757859	0	0	0.080658	0	0.121933	0	0.0774253	0	0	0.0160012	0	0.032664	0	0	0.015162	0.0928419	0	0.200561	0	0.286968	0	0.977	-0.134638	1.0898
TCGA.23.1023.01	0.122291	0	0.00129097	0.138867	0	0.0236863	0	0.047596	0.00452832	0	0	0.00895556	0.121006	0	0	0	0.146204	0.0681812	0.138831	0	0.178563	0	0.625	0.0642156	1.02088
TCGA.23.1024.01	0.0696927	0	0	0.129577	0	0.103742	0	0.0482533	0	0.00105918	0	0.116515	0.0208849	0	0.00311809	0.0192281	0.131428	0.02872	0.135297	0	0.192484	0	0.804	-0.0345947	1.05765
TCGA.23.1026.01	0.0980036	0	0	0.102777	0	0.0574608	0	0.0258409	0.0144113	0	0	0.0788527	0.141358	0	0.0134975	0	0.0918619	0.0273963	0.126089	0	0.222451	0	0.681	0.0337168	1.02463
TCGA.23.1027.01	0.0450872	0	0	0.121718	0	0.0796681	0	0	0.0493387	0	0	0.0393487	0.176135	0	0	0.0482143	0.0866219	0.0225075	0.192157	0.0457231	0.0934802	0	0.621	0.0651959	1.01885
TCGA.23.1028.01	0.160863	0	0	0	0	0	0	0	0.00635605	0.0352203	0	0	0.150355	0.17287	0.0662388	0	0.0765515	0.242116	0	0	0.089429	0	0.215	0.387691	0.914676
TCGA.23.1029.01	0.0114805	0	0	0.0903455	0	0.0117993	0	0.18097	0	0	0	0.0365743	0.205831	0	0	0.032241	0.0533444	0.0629957	0.198942	0	0.115477	0	0.853	-0.0607649	1.05774
TCGA.23.1030.01	0.0500688	0	0.000115905	0.105904	0	0.060445	0	0	0.0129113	0	0	0.0994323	0.199778	0	0.00166944	0.0135345	0.193829	0	0.192091	0	0.0702215	0	0.641	0.055709	1.01412
TCGA.23.1032.01	0.0637973	0	0	0.110546	0	0.0787798	0	0	0	0	0	0	0.0606084	0	0	0	0.150655	0.000259764	0.256087	0	0.279267	0	0.813	-0.0403543	1.04102
TCGA.23.1107.01	0.212514	0	0.0208791	0.142846	0	0.0682433	0	0.119049	0	0	0	0	0	0	0	0	0.0197813	0.0907037	0.0729191	0	0.244344	0.00872144	0.672	0.0369491	1.08057
TCGA.23.1109.01	0.133219	0	0	0.236105	0	0.112084	0	0	0	0	0	0.0644542	0.111744	0	0	0	0.209282	0	0.121098	0	0.00828418	0.00372839	0.626	0.0639924	1.05479
TCGA.23.1110.01	0.0964385	0	0	0.042033	0	0.14851	0	0	0.0266467	0	0	0	0.0534091	0	0	0	0.148168	0	0.252738	0	0.201957	0.0300987	0.996	-0.176922	1.0897
TCGA.23.1111.01	0.0638403	0	0	0.0615013	0	0.0288009	0	0	0.0484504	0	0	0	0.187431	0	0	0	0.13744	0.0290811	0.19481	0	0.248645	0	0.756	-0.00516959	1.02348
TCGA.23.1113.01	0.0459656	0	0	0.102404	0	0.0819079	0	0.0322198	0	0	0	0.00376635	0.171339	0	0	0	0.169838	0	0.214776	0	0.177784	0	0.752	-0.00166468	1.03536
TCGA.23.1114.01	0.000140122	0	0	0.11218	0	0.0804681	0	0.127281	0	0	0	0.0524901	0.186374	0	0	0	0.107724	0	0.258484	0	0.0136305	0.0612288	0.818	-0.0438663	1.06936
TCGA.23.1116.01	0.270126	0	0.019318	0	0	0.00922364	0.0287535	0.0704014	0.0570742	0	0	0.0986283	0.103609	0	0.0175218	0.0810765	0.0183664	0.0732118	0	0	0	0.152689	0.257	0.347714	0.933892
TCGA.23.1118.01	0.0753138	0	0	0.173551	0	0.0300293	0	0.137643	0	0.0399492	0	0.062554	0.0414598	0	0.0571277	0	0.0442152	0.242481	0.0956756	0	0	0	0.423	0.202851	1.02252
TCGA.23.1119.01	0.131787	0	0	0.0231472	0	0.193748	0	0	0.0432281	0	0	0	0.0138399	0	0.1035	0	0.0833399	0	0.135653	0	0.258626	0.0131296	0.535	0.121838	1.02464
TCGA.23.1120.01	0.0976087	0	0	0.20559	0	0.0997301	0	0.00679201	0.0395203	0	0	0.147478	0.0577626	0	0.0832836	0	0.0169684	0.0603472	0.181787	0	0	0.00313178	0.442	0.188727	1.00705
TCGA.23.1122.01	0.146692	0	0	0.10218	0	0.091293	0	0.0716263	0	0	0	0	0.183816	0	0	0.00515474	0.117954	0.0118384	0.230414	0	0.0390318	0	0.782	-0.0191383	1.06155
TCGA.23.1123.01	0.384094	0	0.0165481	0	0	0	0	0.207114	0	0.0317648	0	0.100884	0	0	0.0179289	0.0438528	0.0410284	0.0279084	0.0581885	0.0330981	0.0375889	0	0.242	0.364205	0.941467
TCGA.23.1809.01	0.0507372	0	0	0.14504	0	0.0486948	0	0	0	0	0	0.0139933	0.0912629	0	0	0.0028597	0.292844	0	0.201713	0	0.152855	0	0.625	0.0640645	1.01455
TCGA.23.2077.01	0.062816	0	0	0.104808	0	0.119412	0	0	0.0384164	0	0	0.11442	0.15527	0	0.00345115	0.0512244	0.112801	0.000228452	0.175557	0	0	0.0615953	0.69	0.0308024	1.03615
TCGA.23.2078.01	0.265418	0	0.00929547	0.0661069	0	0.101831	0	0.031257	0	0.0213855	0	0.0124263	0.0087809	0	0.0558052	0	0.089754	0	0.135496	0	0.202444	0	0.307	0.302817	0.952047
TCGA.23.2081.01	0.0275915	0	0	0.0295131	0	0.103241	0	0.031691	0.00584682	0	0	0	0.140261	0	0	0	0.111421	0.0114314	0.2527	0	0.286304	0	0.798	-0.0312719	1.03318
TCGA.23.2084.01	0.0661542	0	0	0.106257	0	0.0325138	0	0.0548071	0	0.0109538	0	0.0100318	0.118221	0	0	0.0364891	0.0964748	0.0783123	0.1695	0	0.220285	0	0.657	0.0460709	1.01788
TCGA.24.0966.01	0.0774646	0	0	0.157375	0	0.0505056	0	0	0.0624165	0	0	0.0159395	0.181424	0	0	0	0.151032	0.0960166	0.134753	0	0.0730737	0	0.755	-0.00442	1.04864
TCGA.24.0968.01	0.345122	0	0.00677225	0.0739642	0	0.0724848	0	0.141645	0.0456854	0	0	0.110092	0	0	0.032676	0	9.91665e-05	0.000616777	0.0946319	0	0.071253	0.00495734	0.428	0.198064	1.0354
TCGA.24.0970.01	0.069541	0	0	0.0482276	0	0.0800368	0	0	0.0273209	0	0	0	0.170295	0	0	0	0.124365	0	0.191815	0	0.288398	0	0.824	-0.046027	1.03876
TCGA.24.0975.01	0.0958565	0	0.00247523	0.157445	0	0.0449835	0	0.000707194	0.0171521	0	0	0.0437125	0.178322	0	0	0	0.163692	0	0.167552	0	0.128101	0	0.613	0.0714894	1.01867
TCGA.24.0979.01	0.0739107	0	0	0.0573839	0	0.0591231	0	0.0477418	0	0	0	0	0.1726	0	0	0	0.0922283	0.0283106	0.236087	0	0.232614	0	0.79	-0.0253312	1.03324
TCGA.24.0982.01	0.226082	0	0.0457114	0.0261245	0	0.0571821	0	0.0278064	0.0738949	0.0276262	0	0.0197386	0.0815181	0.0857048	0	0.0917071	0.0709922	0	0.0650678	0	0.100844	0	0.379	0.241893	0.975275
TCGA.24.1103.01	0.0686188	0	0	0.0902662	0	0	0	0.0673597	0	0	0.0747228	0	0.0532483	0	0	0	0.108978	0.0949379	0.0803599	0	0.361508	0	0.719	0.0176096	1.02342
TCGA.24.1104.01	0.124178	0	0	0.0689071	0	0.0222268	0	0.189206	0.0327371	0.0880174	0.0644925	0	0	0.0135792	0	0	0.0231197	0.308204	0	0	0.0653319	0	0.263	0.343497	0.945144
TCGA.24.1105.01	0.0931812	0	0.00413826	0.164197	0	0.0976472	0	0	0.0380807	0	0.00111826	0	0.0801043	0	0.0490756	0	0.202677	0	0.0712297	0	0.19855	0	0.625	0.0643084	1.03397
TCGA.24.1413.01	0.0434866	0	0	0.106987	0	0.0216809	0	0.092558	0.0541794	0	0.0343903	0	0	0	0	0	0.0399432	0.266759	0.145903	0	0.179744	0.0143685	0.568	0.0952506	1.03703
TCGA.24.1416.01	0.0244561	0	0	0.0523758	0	0.0833694	0	0.0656933	0	0	0.0189006	0	0.062727	0	0	0	0.11467	0.0333	0.285054	0	0.259454	0	0.736	0.00809599	1.02577
TCGA.24.1417.01	0.185977	0	0.0127189	0.0534794	0	0.00807388	0	0.124645	0.0158209	0.101654	0	0.160766	0.0368191	0	0.0164667	0.0320301	0.0192016	0.129479	0.0539491	0	0.044959	0.0039601	0.323	0.291078	0.951383
TCGA.24.1418.01	0.0890083	0	0	0.0999255	0	0.0594142	0	0.00031138	0.0146041	0	0	0.0794848	0.196348	0	0	0	0.164841	0	0.264716	0	0.0313462	0	0.632	0.0604657	1.01421
TCGA.24.1419.01	0.0585423	0	0	0.0512465	0	0.166126	0	0.0467151	0	0	0.103631	0	0.187367	0	0	0	0.149373	0	0.176028	0	0.0609705	0	0.759	-0.00925565	1.05357
TCGA.24.1422.01	0.0704535	0	0.00252865	0.076888	0	0.100289	0	0.0383165	0.046083	0	0.0434954	0.0585582	0.0646438	0.0258856	0	0.073055	0.0599742	0	0.187623	0	0.152207	0	0.701	0.0265843	1.03254
TCGA.24.1423.01	0.0767895	0	0	0.119083	0	0.0966369	0	0.00621116	0	0.00818393	0	0.0527196	0.176426	0	0.00499509	0	0.224488	0	0.224736	0	0.0097303	0	0.661	0.0406663	1.02645
TCGA.24.1424.01	0.222568	0	0.00151288	0.093086	0	0.0534559	0	0.0555329	0	0	0	0.116052	0.0453068	0	0.00618442	0.0303954	0.128602	0	0.136711	0	0.110593	0	0.556	0.102998	1.02136
TCGA.24.1425.01	0.0557511	0	0	0.0669778	0	0.073374	0	0.0461808	0.0369593	0	0.0733486	0	0.11586	0.051632	0	0.0299084	0.116481	0.0386693	0.125098	0	0.169759	0	0.657	0.0458479	1.02165
TCGA.24.1426.01	0.0282477	0	0	0.101792	0	0.0844069	0	0	0	0	0	0.0533268	0.136123	0	0	0.0107914	0.139982	0	0.18714	0	0.258191	0	0.716	0.0199198	1.02495
TCGA.24.1427.01	0.109193	0	0.00460409	0.129417	0	0.0740296	0	0.0086636	0.0156864	0	0	0.051814	0.15931	0	0.00230954	0	0.179857	0	0.147382	0	0.117732	0	0.608	0.0742502	1.01995
TCGA.24.1428.01	0.561704	0	0.0273216	0	0	0.0761354	0	0.08185	0.0209361	0	0	0.0878501	0	0.0270593	0.00985378	0	0	0.10729	0	0	0	0	0.054	0.719559	0.696448
TCGA.24.1430.01	0.0571763	0	0	0.0596956	0	0.0978249	0	0.0845717	0	0	0	0	0.161967	0	0	0	0.114226	0	0.241881	0	0.182657	0	0.947	-0.111565	1.06966
TCGA.24.1431.01	0.158921	0	0	0.159572	0	0.152443	0	0.0448983	0	0	0	0	0.184787	0	0.0225887	0	0.0935885	0	0.125334	0.0131744	0	0.0446934	0.996	-0.179718	1.16355
TCGA.24.1434.01	0.152843	0	0	0.132309	0	0.067299	0	0	0.0161276	0	0	0.126977	0.0753559	0.00632766	0.0263257	0	0.123163	0	0.158945	0.0413914	0.0643315	0.00860418	0.546	0.111821	1.00741
TCGA.24.1435.01	0.115692	0	0	0.077594	0	0.0960211	0	0.0299006	0.00264988	0	0	0.0249619	0.121435	0	0.0558456	0	0.0845108	0.032414	0.165653	0	0.193323	0	0.498	0.143979	0.997028
TCGA.24.1436.01	0.0465406	0	0	0.146712	0	0.047387	0	0.0873088	0.0242161	0	0	0.082046	0.0824893	0	0	0	0.0767949	0.191738	0.0862849	0	0.128482	0	0.513	0.135199	1.01455
TCGA.24.1463.01	0.0456808	0	0	0.0643167	0	0.0804087	0	0.0394748	0	0	0	0.0445854	0.136424	0	0.0040884	0	0.117063	0	0.192904	0	0.275054	0	0.695	0.0293108	1.02072
TCGA.24.1464.01	0.1132	0	0	0.212409	0	0.0187166	0	0.12867	0	0.115206	0	0	0.0756804	0	0.00622799	0	0.116351	0.00618439	0.207354	0	0	0	0.643	0.0538029	1.05695
TCGA.24.1467.01	0.108142	0	0	0.0799514	0	0.0986805	0	0	0.0576016	0	0	0.040039	0.187971	0	0.0295461	0	0.122348	0	0.169059	0	0.106662	0	0.977	-0.134418	1.08064
TCGA.24.1469.01	0.103617	0	0.00280042	0.0803902	0	0.0811951	0	0	0.0758002	0	0	0.101778	0.0686615	0	0.0168062	0.0539267	0.0628838	0	0.210012	0	0.0928029	0.0493263	0.77	-0.0166496	1.04194
TCGA.24.1470.01	0.458921	0	0.0194883	0	0	0.03349	0	0.0660581	0.0993617	0	0	0.0438115	0	0.0339922	0.0509153	0	0.0496903	0.064772	0	0	0.0794994	0	0.085	0.627344	0.775424
TCGA.24.1471.01	0.130328	0	0	0.0391153	0	0.0926058	0	0.0337165	0	0	0	0.115436	0.185766	0	0.0185553	0	0.057515	0	0.169858	0	0.157104	0	0.942	-0.105035	1.06353
TCGA.24.1474.01	0	0	0	0	0	0	0	0	0	0.188952	0	0.128952	0.217296	0	0.0196048	0.0812099	0.11188	0	0.124463	0.0467109	0.080931	0	0.944	-0.106797	1.04192
TCGA.24.1544.01	0.0881656	0	0	0.0310668	0	0.0726123	0	0.0615033	0	0	0	0	0.16845	0	0	0	0.0940973	0	0.208557	0	0.275547	0	0.82	-0.0446939	1.04145
TCGA.24.1545.01	0.195994	0	0.0633272	0.0514372	0	0.12533	0	0	0.0360837	0	0	0.0477879	0.0502482	0	0.0526507	0	0.108113	0	0.103354	0	0.165675	0	0.296	0.310847	0.946185
TCGA.24.1546.01	0.279454	0	0.0193927	0.0239003	0	0.0686101	0	0.0364398	0.0559252	0	0	0	0.0526827	0.122355	0	0.0329453	0.0863788	0.0182453	0.0898011	0.0148304	0.0831311	0.0159074	0.174	0.441216	0.88699
TCGA.24.1548.01	0.43574	0	0.0211644	0.0357472	0	0.072321	0	0.0484074	0.040433	0	0	0.197751	0	0.0522281	0.00405728	0.0309413	0.0389273	0.0178479	0.00443407	0	0	0	0.116	0.538878	0.835947
TCGA.24.1549.01	0.136577	0	0	0.194165	0	0.00139625	0	0.0307454	0	0.0209559	0.0432043	0	0.0535468	0	0.016028	0	0.138172	0.0243332	0.340533	0	0.000343055	0	0.626	0.0639529	1.02091
TCGA.24.1550.01	0.243619	0	0.0191065	0.0294284	0	0.0317226	0	0.0329802	0.0370794	0	0	0.114	0.0472521	0.150238	0.00511805	0.0681118	0.0757362	0	0.0551966	0	0.0904105	0	0.066	0.675963	0.788206
TCGA.24.1551.01	0.068496	0	0	0.07403	0	0.0408311	0	0.132207	0.024592	0	0	0	0.110944	0.0579785	0.0403522	0	0.0591188	0.135762	0.0654846	0	0.105287	0.0849169	0.354	0.263178	0.962633
TCGA.24.1552.01	0.0743543	0	0	0.149644	0	0.14724	0	0.0027139	0	0	0.0509431	0	0.0917182	0	0.0034708	0	0.340876	0	0.0446872	0	0.094353	0	0.642	0.055005	1.04279
TCGA.24.1553.01	0.307923	0	0.0186278	0.0753353	0	0.0952399	0	0.0522274	0.0488222	0	0	0	0.00338485	0.153817	0.0531421	0	0.0375558	0	0.0115031	0	0.142421	0	0.128	0.514632	0.847869
TCGA.24.1555.01	0.0527371	0	0	0.0829145	0	0.0475374	0	0.0171809	0.00119088	0	0	0.0696849	0.226361	0	0	0	0.108279	0	0.194229	0	0.199885	0	0.757	-0.00800076	1.02783
TCGA.24.1556.01	0.204298	0	0.0143587	0.0675247	0	0.0309345	0	0.0607919	0.0743157	0.0205334	0	0.120897	0.0858441	0	0.0308423	0.0579073	0.0194579	0.135653	0.0437322	0	0.0329079	0	0.273	0.336363	0.934882
TCGA.24.1557.01	0.293298	0	0	0.0732466	0	0.0938168	0	0.0503671	0	0	0	0.105782	0	0	0.00450619	0	0.0717322	0	0.138888	0	0.168363	0	0.282	0.323064	0.945216
TCGA.24.1558.01	0.00828965	0	0	0.10176	0	0.181545	0	0	0	0	0.0300317	0.00212128	0.0914044	0	0	0	0.181582	0	0.216202	0	0.187063	0	0.651	0.0488046	1.03755
TCGA.24.1560.01	0.0717034	0	0	0.0840892	0	0.0538601	0	0.0433107	0	0	0	0.0410858	0.163328	0	0.001408	0	0.113092	0	0.160527	0	0.267596	0	0.986	-0.144728	1.06682
TCGA.24.1562.01	0.0589664	0	0	0.0782006	0	0.087931	0	0.0275365	0.039716	0	0.0277921	8.52805e-06	0.083142	0	0	0.0813858	0.0368063	0	0.288703	0	0.189812	0	0.735	0.00979642	1.03084
TCGA.24.1563.01	0.0510919	0	0	0.0941472	0	0.0558786	0	0.0556804	0.00468255	0	0.0571288	0	0.118964	0.0401947	0	0.0532969	0.135832	0.00860509	0.198869	0	0.125629	0	0.631	0.0612784	1.01535
TCGA.24.1564.01	0.0511143	0	0	0.0730538	0	0.0766084	0	0.0105014	0.0522116	0	0.00442501	0.057216	0.0857541	0.0864596	0	0.054888	0.129157	0.00315665	0.175444	0	0.117985	0.0220255	0.586	0.0852159	1.00842
TCGA.24.1565.01	0.120895	0	0.0077428	0.0790752	0	0.0920792	0	0.180167	0	0.00621557	0.190078	0	0.00402078	0.0271329	0	0	0.0817839	0.0136135	0.145186	0.0113133	0.0406966	0	0.938	-0.102022	1.11271
TCGA.24.1567.01	0	0	0	0	0	0.031024	0	0.100434	0	0	0	0	0.0611847	0	0	0.188352	0.0535412	0	0.247867	0	0.317597	0	0.931	-0.0950273	1.03325
TCGA.24.1603.01	0.0856751	0	0	0.115242	0	0.04934	0	0.064646	0.0360687	0	0.0364034	0.00385187	0	0	0	0	0.15247	0.122217	0.128931	0.0369914	0.146786	0.0213769	0.91	-0.0861901	1.07545
TCGA.24.1604.01	0.0622277	0	0.00467425	0.0690231	0	0.0535119	0	0	0.0506403	0	0	0.0606556	0.166626	0	0.00445311	0.119987	0.056212	0.0223837	0.183564	0	0.146041	0	0.71	0.0235085	1.01722
TCGA.24.1616.01	0.0674555	0	0	0.136167	0	0.0223004	0	0.106218	0	0.00526466	0	0	0.16449	0	0	0	0.122619	0.0333912	0.0910569	0	0.251037	0	0.838	-0.053242	1.06011
TCGA.24.1842.01	0.26779	0	0.00467134	0.0663099	0	0.106583	0	0	0.0965347	0	0	0.111496	0.0369406	0	0.0328464	0	0.0459617	0	0.12047	0	0.110396	0	0.426	0.20121	1.0001
TCGA.24.1843.01	0.0326829	0	0.10957	0.105705	0	0.0964209	0	0	0.113098	0	0	0.16555	0.0327875	0	0.0338774	0	0.173427	0	0.0824717	0.0158253	0.0385834	0	0.48	0.153283	1.00314
TCGA.24.1844.01	0.0483912	0	0	0.0862694	0	0.12337	0	0.0599518	0	0	0.000678495	0	0.136549	0	0	0	0.0990452	0	0.23946	0	0.206285	0	0.795	-0.0301904	1.05425
TCGA.24.1845.01	0.0806374	0	0	0	0	0	0	0.175331	0	0.0528275	0	0	0.0524648	0	0	0	0.0297183	0.457787	0	0	0.139174	0.0120593	0.043	0.741643	0.687659
TCGA.24.1846.01	0.0913111	0	0	0.115319	0	0.0594588	0	0.0587119	0.0108584	0	0	0.0580392	0.226515	0	0.00660515	0	0.0465466	0.0474548	0.27918	0	0	0	0.749	7.71292e-05	1.03951
TCGA.24.1849.01	0.422416	0	0.0400983	0.0670836	0	0.144038	0	0.0240352	0.077225	0	0	0.0148562	0	0.0672238	0	0.0718904	0.0390659	0	0	0	0.00103939	0.0310278	0.095	0.603946	0.792669
TCGA.24.1850.01	0.226709	0	0.0178638	0	0	0.0253989	0	0.0645739	0.0655052	0	0	0	0	0	0.075074	0.0498432	0.143113	0	0.0984225	0	0.181418	0.0520783	0.653	0.0473873	1.04747
TCGA.24.1923.01	0.0372991	0	0	0.0924097	0	0.0881215	0	0.0589642	0	0	0.0648882	0	0.166643	0	0	0.0479467	0.105594	0.0181602	0.171966	0	0.148008	0	0.749	0.000411764	1.03806
TCGA.24.1924.01	0.185477	0	0	0.0654966	0	0.0288651	0	0.0891878	0.0446004	0.150845	0	0.0962281	0.014249	0	0.1188	0	0.00212588	0.11252	0	0	0.0916053	0	0.102	0.590626	0.805063
TCGA.24.1928.01	0.025212	0	0	0.117043	0	0.0849121	0	0.0626776	0.0464114	0	0	0	0.0398077	0	0.0423937	0	0.053775	0	0.287186	0.066141	0.174441	0	0.93	-0.094782	1.07618
TCGA.24.1930.01	0.370284	0	0.0429094	0.0496611	0	0.103053	0	0	0.0870147	0	0	0.122852	0	0.0864859	0.0642637	0	0.055294	0	0	0	0.0181824	0	0.062	0.682804	0.731717
TCGA.24.2019.01	0.566902	0	0.0129755	0.0419701	0	0.0637998	0	0.106984	0.0180581	0.0138059	0	0.0657407	0	0.0456157	0.0238834	0	0.0397914	0	0	0	0.000473455	0	0.093	0.611401	0.802759
TCGA.24.2020.01	0.0436811	0	0	0.0603315	0	0.148709	0	0.0521803	0	0	0	0	0.118305	0	0.0203154	0	0.134	0	0.215663	0	0.206815	0	0.999	-0.215369	1.10381
TCGA.24.2023.01	0.0138462	0	0	0.0666594	0	0.0166729	0	0.101675	0.0448201	0	0.0355197	0	0.103785	0.0781963	0	0.0812287	0.035666	0.200921	0.101086	0	0.119535	0.000389518	0.417	0.209535	0.976456
TCGA.24.2024.01	0.0512661	0	0.00247274	0.106419	0	0.0558177	0	0.0550218	0	0	0.075064	0	0.112927	0.0393477	0	0.080296	0.140038	0.0137688	0.153809	0	0.113752	0	0.72	0.0168292	1.02835
TCGA.24.2026.01	0.430932	0	0.0360234	0.0207694	0	0.0489016	0	0.0495168	0.0462639	0	0	0.193182	0	0.110057	0.00678724	0	0.0372477	0.0170777	0	0	0	0.00324084	0.042	0.744965	0.671477
TCGA.24.2027.01	0.0273774	0	0	0.0733814	0	0.0568296	0	0.0834614	0	0	0.058612	0	0.119812	0	0	0.0729203	0.0688929	0	0.266905	0	0.171809	0	0.977	-0.133932	1.06231
TCGA.24.2033.01	0.03716	0	0.000112315	0.106415	0	0.107173	0	0.0413422	0	0	0.0262085	0.0430661	0.0708775	0	0	0.0673886	0.0804851	0	0.220539	0	0.188804	0.0104285	0.659	0.0428277	1.02729
TCGA.24.2035.01	0.163502	0	0.00566443	0.114823	0	0.11559	0	0	0.0585657	0.0480144	0	0.0825878	0.0908015	0.0160778	0.0341266	0	0.173422	0	0.056842	0	0.0399837	0	0.55	0.108348	1.02646
TCGA.24.2036.01	0.0523876	0	0	0.0113011	0	0.121234	0	0.000131118	0	0	0.0466225	0	0.161628	0	0	0	0.0976342	0	0.267897	0	0.241165	0	0.996	-0.179823	1.06594
TCGA.24.2038.01	0.0497085	0	0	0.13619	0	0.0636836	0	0.0612871	0	0	0.00843495	0.0128372	0.287269	0.0369572	0	0	0.188458	0	0.0996375	0	0.0555379	0	0.659	0.0423103	1.03379
TCGA.24.2254.01	0.000571622	0	0	0.0908034	0	0.0812763	0	0.0775434	0	0	0.00538382	0.0297383	0.0524944	0	0	0.00479456	0.0700253	0	0.23668	0.13621	0.12936	0.0851185	0.645	0.0523361	1.02927
TCGA.24.2261.01	0.227229	0	0.0157151	0.0362598	0	0.0753817	0	0	0.112585	0.0122909	0	0.0772282	0.0877514	0.108582	0.103521	0.0162823	0.0824854	0	0.0149318	0	0.0237397	0.00601648	0.259	0.345992	0.934563
TCGA.24.2262.01	0.304908	0	0.0240685	0.0564484	0	0.0812541	0	0.0143905	0.0552912	0	0	0.0775571	0.00376693	0.0466858	0.0419799	0	0.101797	0	0.0674556	0	0.124398	0	0.366	0.256109	0.981011
TCGA.24.2267.01	0.367475	0	0.0259472	0.070574	0	0	0	0.0956604	0.0276014	0	0	0.152773	0	0.185526	0.00293914	0	0.0335849	0.0152258	0	0	0	0.0226932	0.057	0.709834	0.714257
TCGA.24.2271.01	0.120062	0	0.00742121	0.253012	0	0	0	0	0.00681516	0	0	0.0197254	0.0424664	0	0.0129868	0	0.273874	0	0.0660091	0	0.197627	0	0.602	0.0781344	1.0236
TCGA.24.2280.01	0.201466	0	0.0453986	0.0369659	0	0.0720799	0	0.0318413	0.048092	0	0	0.0525037	0.0512865	0.0986307	0	0.0777071	0.0749083	0	0.10394	0	0.10518	0	0.403	0.222029	0.978628
TCGA.24.2281.01	0.122808	0	0.0224826	0.13504	0	0.0986116	0	0	0.00537312	0	0	0	0	0.0464261	0.0963827	0	0.145177	0	0.167483	0	0.159811	0.000404204	0.464	0.16803	1.00034
TCGA.24.2288.01	0.337969	0	0.0195581	0.0947715	0	0.105989	0	0.0420416	0.0452147	0	0	0.045522	0	0.108361	0.00505222	0	0.00199916	0	0.0845073	0	0.109014	0	0.09	0.617657	0.779206
TCGA.24.2289.01	0.0714331	0	0	0.0884558	0	0.0333178	0	0.0919018	0	0	0	0.0257286	0.201736	0	0	0	0.119245	0	0.248139	0.0276436	0.0923988	0	0.678	0.0351779	1.02349
TCGA.24.2290.01	0.0731828	0	0	0.097529	0	0.0803308	0	0.0811046	0	0.00272334	0	0.0317686	0.0518146	0	0	0	0.141173	0.0503415	0.239401	0	0.150603	2.76211e-05	0.969	-0.125505	1.07647
TCGA.24.2293.01	0.150887	0	0.0265841	0.0461502	0	0.0849728	0	0.00231623	0.05772	0	0	0.0262302	0.106349	0.0962316	0.00703291	0.124759	0.0617049	0	0.106642	0	0.0583708	0.0440493	0.417	0.21038	0.975671
TCGA.24.2297.01	0.049388	0	0	0.114568	0	0.0588118	0	0.0304183	0.0815311	0	0.0309934	0	0	0	0	0	0.0712147	0.220527	0.166951	0	0.175597	0	0.828	-0.0478803	1.08378
TCGA.24.2298.01	0.0632149	0	0	0.0785978	0	0.0536124	0	0.0514958	0	0	0	0.0564819	0.141706	0	0	0.0212424	0.104193	0.0354607	0.233148	0	0.160847	0	0.73	0.0133946	1.02299
TCGA.25.1312.01	0.0242249	0	0	0.080361	0	0.0663381	0	0.0900317	0	0	0.0408578	0.0194506	0.12929	0	0	0.0264838	0.100524	0.00642806	0.223757	0	0.192253	0	0.79	-0.0253156	1.04101
TCGA.25.1313.01	0.0497372	0	0.000798415	0.0575109	0	0.040265	0	0.0326218	0.0391805	0	0	0.0720659	0.180922	0	0	0.106381	0.0353588	0.0897648	0.152435	0	0.142959	0	0.582	0.0880766	1.00181
TCGA.25.1314.01	0.0713822	0	0	0.107112	0	0.0984712	0	0.0180864	0	0	0	0.0417781	0.119881	0	0.0035633	0.00916907	0.144534	0	0.279039	0	0.106983	0	0.649	0.0499246	1.02173
TCGA.25.1315.01	0	0	0	0.0854708	0	0.0384243	0	0.0496609	0	0	0	0	0.0756441	0	0	0.118031	0.0449034	0.125906	0.208864	0	0.253095	0	0.993	-0.162669	1.0676
TCGA.25.1316.01	0.061453	0	0	0	0	0.00949584	0.0115646	0.122141	0	0	0	0	0.0605948	0	0.0249721	0.0944261	0.0801824	0	0.340022	0	0.195148	0	0.888	-0.0747296	1.03067
TCGA.25.1317.01	0.162838	0	0.0335449	0.0633876	0	0.0447704	0	0.0616468	0.0226501	0.00704415	0	0.00498983	0.0364561	0.0280618	0	0.108269	0.082462	0	0.200089	0	0.143789	0	0.532	0.124523	1.00587
TCGA.25.1318.01	0.0660145	0	0	0.0719967	0	0.0823987	0	0.0229528	0	0	0	0	0.174978	0	0.00160572	0	0.0960527	0	0.232909	0	0.251092	0	0.689	0.0314145	1.02234
TCGA.25.1319.01	0.0917813	0	0	0.101396	0	0.0656363	0	0.0211669	0.043637	0	0	0.101474	0.0359209	0	0.0283598	0	0.0745624	0.00912371	0.158307	0	0.268634	0	0.733	0.0119947	1.03162
TCGA.25.1320.01	0.0935029	0	0.00390085	0.0546339	0	0.0692471	0	0	0.0965539	0	0	0	0.0184765	0	0	0.164558	0.129704	0	0.164521	0.00382807	0.166769	0.0343041	0.644	0.0526842	1.01719
TCGA.25.1321.01	0.0361718	0	0	0.102625	0	0.110529	0	0.0332723	0	0	0	0.0821217	0.197606	0	0.000132301	0.00217677	0.14588	0	0.166584	0	0.122902	0	0.657	0.0454836	1.02775
TCGA.25.1322.01	0.0353674	0	0.00396089	0.0558	0	0.0534238	0	0.0269243	0.0171979	0	0	0	0.128473	0.00528938	0	0.0864852	0.0522431	0.0750676	0.238979	0	0.215611	0.00517742	0.756	-0.00572398	1.02236
TCGA.25.1323.01	0.0292754	0	0	0.0435214	0	0.0544316	0	0.0367186	0.0291201	0	0.0193318	0	0.120542	0	0	0.179207	0.084307	0.014179	0.187743	0	0.201622	0	0.932	-0.0957302	1.03982
TCGA.25.1324.01	0.193108	0	0.00112094	0.144426	0	0	0	0.0745336	0	0	0	0.203016	0.094603	0	0.00513433	0	0.116916	0	0.0809997	0	0.0861429	0	0.514	0.134555	1.0069
TCGA.25.1326.01	0.265423	0	0.00614455	0.0458121	0	0.114305	0	0.000110437	0.0275272	0	0	0	0.0177317	0.0507876	0.091481	0	0.0871142	0	0.125584	0	0.15919	0.00878942	0.301	0.308494	0.952069
TCGA.25.1328.01	0.0348783	0	0	0.0969852	0	0.101563	0	0.0236669	0.011524	0	0.0475069	0.0332307	0.148718	0.0106263	0	0.0460608	0.118882	0	0.232059	0	0.0942994	0	0.617	0.0703212	1.01716
TCGA.25.1329.01	0.240113	0	0.029353	0.0324441	0	0.047538	0	0.100438	0.00983549	0	0	0.0110704	0.0269087	0.0692014	0	0.0911481	0.0477274	0.0211966	0.135259	0	0.132682	0.00508535	0.414	0.211996	0.986277
TCGA.25.1623.01	0.268666	0	0.030912	0.0251902	0	0.0491908	0	0.0594464	0.0684855	0	0	0.0385622	0.026275	0.0822522	0	0.0523907	0.0414469	0.028101	0.0954092	0	0.133672	0	0.084	0.629708	0.788823
TCGA.25.1625.01	0.0415222	0	0	0.0765014	0	0.0361785	0	0.0814084	0.032475	0.0107297	0.0161225	0	0.119394	0.106317	0	0.0293069	0.0257675	0.163119	0.119997	0	0.141159	0	0.55	0.107634	1.00886
TCGA.25.1626.01	0.0828213	0	0.000742062	0.0800439	0	0.100447	0	0	0.036658	0	0	0.0728181	0.0739058	0	0.00502012	0.113944	0.0574763	0	0.159212	0	0.216911	0	0.534	0.123565	0.998668
TCGA.25.1627.01	0.0365415	0	0	0.1027	0	0.114457	0	0.0442345	0	0	0	0.0352609	0.151781	0	0	0.00268203	0.125234	0	0.24098	0	0.146129	0	0.68	0.034237	1.03238
TCGA.25.1628.01	0.213548	0	0.00645256	0.0692853	0	0.107184	0	0	0.077168	0	0	0.0353405	0.0409799	0	0.0565685	0	0.06069	0	0.135461	0	0.197322	0	0.465	0.164018	1.00567
TCGA.25.1630.01	0	0	0	0.0551599	0	0.0444743	0	0.0591231	0.0504487	0	0.00778909	0.0601476	0.133236	0.0318417	0	0.0761005	0.0494438	0	0.158411	0.0396539	0.0533801	0.180791	0.48	0.153256	0.995022
TCGA.25.1631.01	0.0312717	0	0	0.0395177	0	0.0646231	0	0.0790889	0	0	0.00486635	0	0.109863	0	0	0	0.0935938	0.0322449	0.197487	0	0.347443	0	0.791	-0.0261837	1.03221
TCGA.25.1632.01	0.0405642	0	0	0.0641938	0	0.0570518	0	0.012872	0.0116263	0	0	0.0766633	0.215155	0	0	0	0.165896	0	0.183638	0	0.17234	0	0.735	0.00936345	1.02186
TCGA.25.1633.01	0.205261	0	0.00745597	0.0437673	0	0.0580645	0	0.05805	0.058507	0	0	0.0617456	0.0315649	0.0536891	0.0201106	0.0554383	0.0692616	0	0.138872	0	0.118206	0.0200057	0.451	0.179354	0.990915
TCGA.25.1634.01	0.0925251	0	0	0.140831	0	0.0570793	0	0.0455707	0	0	0	0	0.236116	0	0	0	0.229016	0	0.198862	0	0	0	0.712	0.0221348	1.03696
TCGA.25.1635.01	0.0880565	0	0	0.0868974	0	0.062223	0.0242298	0.00154526	0.138706	0	0	0.176574	0.0954744	0	0.0302409	0.013558	0.0367957	0	0.160267	0	0.0747735	0.0106586	0.559	0.0991178	1.01257
TCGA.25.1871.01	0.0904997	0	0	0.0930619	0	0.170042	0	0.0896825	0	0	0.00533772	0	0.203782	0	0	0	0.128106	0	0.190154	0	0	0.0293339	0.99	-0.155897	1.13331
TCGA.25.1877.01	0.572396	0	0.0435475	0	0	0.0433358	0	0.158623	0	0	0	0	0	0.023391	0.0591262	0	0.0440619	0	0	0	0.055519	0	0.075	0.650338	0.777218
TCGA.25.2042.01	0.194809	0	0.0280592	0.0424634	0	0.0800441	0	0	0.0649795	0	0	0.0354959	0.0335302	0.0790034	0	0.0872534	0.0809023	0	0.141846	0	0.127168	0.00444643	0.462	0.170157	0.994059
TCGA.25.2391.01	0.04081	0	0	0.11549	0	0.0168875	0	0.142049	0.0205562	0.0133174	0.0404731	0	0.0610106	0.0183438	0	0	0.0362574	0.214523	0.130043	0	0.15024	0	0.791	-0.0264645	1.07614
TCGA.25.2392.01	0.104261	0	0	0.149849	0	0.06448	0	0	0.129551	0	0	0.165898	0.124754	0	0.0131753	0.0612292	0.0487911	0	0.0492184	0	0	0.0887934	0.676	0.0359116	1.05376
TCGA.25.2393.01	0.0751523	0	0	0.16402	0	0.121316	0	0.0284183	0.0141849	0	0	0	0	0	0	0.0127082	0.109522	0.0207062	0.287857	0.00999789	0.104141	0.0519764	0.64	0.0567901	1.04044
TCGA.25.2396.01	0.102293	0	0	0.110693	0	0.0676333	0	0.0582389	0.093556	0	0	0.0709053	0.0754351	0	0.0685974	0.0892994	0.0956584	0	0.102044	0.000318685	0.0653262	0	0.528	0.126454	1.01277
TCGA.25.2397.01	0.0395486	0	0	0.121697	0	0.124229	0	0.0259829	0	0	0.0118263	0.0140795	0.0988212	0	0	0.0335695	0.0829555	0.00544682	0.259142	0	0.182702	0	0.639	0.0573195	1.02747
TCGA.25.2398.01	0.212981	0	0.00427434	0.0805452	0	0.0884508	0	0.0567713	0	0	0	0.0487504	0	0.0588169	0.000147189	0.0648137	0.0971938	0	0.173255	0	0.114001	0	0.498	0.143732	1.00828
TCGA.25.2399.01	0.0785186	0	0	0.120055	0	0.0733104	0	0.0193322	0.010487	0	0	0.106658	0.15892	0	0.0159272	0	0.147222	0	0.176611	0	0.0929585	0	0.661	0.0407176	1.02327
TCGA.25.2400.01	0.0580376	0	0	0.103598	0	0.0715183	0	0.0824065	0	0	0	0.132321	0.0823039	0	0.0213053	0	0.0432779	0.00676143	0.257979	0	0.0741579	0.0663329	0.997	-0.182966	1.09179
TCGA.25.2401.01	0.108243	0	0.00806649	0.0396052	0	0.0467478	0	0	0.126727	0.0162673	0	0.0646396	0.106796	0.0803078	0.0468847	0.0414723	0.0543871	0.0784574	0.0550249	0	0.0994933	0.0268801	0.215	0.386986	0.911894
TCGA.25.2404.01	0.0625242	0	0	0.127714	0	0.0622337	0	0.0283909	0	0	0	0.10734	0.186607	0	0.00713993	0	0.217557	0	0.0909554	0	0.109538	0	0.643	0.0542255	1.02013
TCGA.25.2409.01	0.0688897	0	0	0.109599	0	0.116213	0	0.0191976	0.00762899	0	0	0	0.125391	0	0	0.00499261	0.116253	0.029003	0.215878	0	0.186954	0	0.653	0.0476499	1.02881
TCGA.29.1688.01	0.0281917	0	0	0.0918664	0	0	0	0.157187	0	0.124284	0	0.0574601	0.0782059	0	0.0131085	0	0	0.256661	0.0866612	0	0.106374	0	0.267	0.34011	0.934074
TCGA.29.1690.01	0.0346464	0	0	0.0830456	0	0.0615499	0	0.0188274	0.032458	0	0.0464749	0	0.176834	0.130888	0	0.0177542	0.131462	0	0.166888	0	0.0991712	0	0.582	0.0880062	1.00874
TCGA.29.1691.01	0.337593	0	0.00412727	0.0369075	0	0.137651	0	0	0.0524568	0	0	0.019912	0	0	0.0210455	0	0.0784768	0	0.147072	0	0.155178	0.00958004	0.28	0.328045	0.950337
TCGA.29.1693.01	0.0593861	0	0	0.074813	0	0.00781487	0	0.068689	0	0.0348765	0	0.0696303	0.167221	0	0	0.0485779	0.131949	0.0785676	0.178447	0	0.0800289	0	0.651	0.0484882	1.01114
TCGA.29.1694.01	0.0376529	0	0	0.0436719	0	0.053598	0	0.0480035	0.0298065	0	0	0.0348102	0.123259	0.0915756	0	0.0544685	0.0591367	0.0713788	0.16541	0	0.187228	0	0.644	0.053457	1.01105
TCGA.29.1695.01	0.0680254	0	0	0.148582	0	0.133311	0	0.0160275	0.00726437	0.0755605	0	0.0711026	0.0391703	0	0.0746991	0.0427286	0.097505	0	0.0836261	0.142398	0	0	0.514	0.13484	1.01689
TCGA.29.1696.01	0.0914093	0	0	0.0233264	0	0.0516719	0	0	0.0312572	0.0439027	0	0	0.306878	0	0.00191408	0	0.0874451	0.0649355	0.148624	0	0.148636	0	0.824	-0.0458404	1.04154
TCGA.29.1697.01	0.034612	0	0	0.10277	0	0.0202036	0	0.131785	0	0	0	0	0	0	0	0	0.0754094	0.143128	0.164748	0	0.327345	0	0.754	-0.00315592	1.04456
TCGA.29.1698.01	0.0586998	0	0	0.0061068	0	0.0262105	0	0	0.168791	0	0	0.0390617	0.102943	0	0.0470445	0.0787324	0.0625427	0	0.180215	0	0.22083	0.0088214	0.79	-0.0260771	1.03204
TCGA.29.1699.01	0.0606639	0	0	0.058574	0	0	0	0.138037	0.0145015	0.103902	0	0.0461442	0.0627199	0	0	0	0	0.351825	0.0488353	0	0.114797	0	0.093	0.609849	0.79311
TCGA.29.1701.01	0.102398	0	0	0.119454	0	0.0422675	0	0.0804887	0.102672	0	0	0.137015	0.0745959	0	0.103624	0	0.0947866	0	0.112708	0.0299905	0	0	0.341	0.274751	0.962639
TCGA.29.1702.01	0.0682953	0	0	0.0483204	0	0.0724748	0	0.0900539	0	0	0.0436952	0.0435582	0.126198	0	0	0	0.113654	0	0.198565	0	0.195185	0	0.849	-0.0572337	1.04826
TCGA.29.1703.01	0.0843824	0	0	0	0	0	0.0169736	0.030856	0.0788616	0	0.0504315	0.0238327	0	0	0	0	0.146612	0	0.349084	0.0728148	0.146151	0	0.998	-0.19661	1.06088
TCGA.29.1705.02	0.0650108	0	0	0.185343	0	0.0426932	0	0	0.0114503	0	0	0.0588624	0.110515	0	0.00958048	0.0127794	0.20171	0	0.127777	0	0.170944	0.00333477	0.62	0.0664569	1.01889
TCGA.29.1705.01	0.0479395	0	0	0.127783	0	0.0934829	0	0	0.00153425	0	0	0.0465283	0.145997	0	0.00412888	0	0.147938	0	0.180784	0	0.203883	0	0.627	0.0634244	1.01913
TCGA.29.1707.02	0.00440054	0	0	0.0118497	0	0	0	0.18416	0	0.0676585	0.0135663	0	0.108906	0.10358	0	0	0.00564368	0.423257	0	0	0.0639783	0.0130005	0.039	0.75186	0.68553
TCGA.29.1710.01	0.336104	0	0.0266474	0.0391252	0	0.0908357	0	0.0072598	0.0720386	0	0	0	0.0357955	0.142753	0.0219533	0.0123957	0.0772813	0	0.0482747	0	0.0895362	0	0.083	0.635551	0.771237
TCGA.29.1711.01	0.158769	0	0	0	0	0.0128468	0	0	0.0719823	0.045554	0	0.108083	0.136469	0.00609191	0.169328	0	0.0450569	0	0.110604	0	0.135215	0	0.113	0.548792	0.828915
TCGA.29.1761.01	0.30337	0	0.0154258	0	0	0	0.0368733	0.11659	0.0524965	0.0564163	0	0.0629056	0.0582001	0.0183765	0.231937	0	0.0462608	0	0	0	0	0.00114724	0.091	0.616287	0.80546
TCGA.29.1762.01	0.0824675	0	0	0.060061	0	0.152466	0	0.000224857	0.0187995	0	0	0	0.211609	0	0	0	0.125538	0	0.246341	0	0.0100933	0.0924002	0.986	-0.146472	1.09876
TCGA.29.1763.01	0.0605748	0	0	0.0798244	0	0.0238418	0	0.149614	0	0.0310767	0	0.0155671	0.12062	0	0	0.0361982	0.0534895	0.0762079	0.18462	0	0.168366	0	0.852	-0.0602209	1.05652
TCGA.29.1766.01	0.265092	0	0.0080902	0.0640062	0	0.066018	0	0.0568558	0.0480991	0	0	0.126833	0.0142884	0	0.00660882	0.020319	0.0576266	0.0226391	0.13534	0	0.108183	0	0.474	0.158424	1.01349
TCGA.29.1768.01	0.187998	0	0.0454345	0	0	0.01191	0.00993962	0.0481918	0.0236859	0	0	0.0406879	0.174391	0.0949638	0.0523398	0.049533	0.0239527	0.0470221	0.072986	0	0.0863423	0.0306217	0.107	0.576572	0.830835
TCGA.29.1769.01	0.0297062	0	0	0.16364	0	0.088817	0	0.0686871	0.0169618	0	0.0264951	0.0127871	0	0	0	0.126261	0.0113711	0.0496156	0.216574	0	0.114571	0.0745131	0.8	-0.0328133	1.06899
TCGA.29.1770.02	0.0459652	0	0	0.120753	0	0.0764988	0	0	0	0	0	0.0331036	0.201011	0	0	0	0.141481	0	0.223084	0	0.158103	0	0.678	0.0352456	1.024
TCGA.29.1770.01	0.0371527	0	0	0.0789745	0	0.072294	0	0	0.0117602	0	0	0.0599634	0.180042	0	0	0.00385456	0.189311	0	0.21423	0	0.152418	0	0.631	0.0606943	1.01176
TCGA.29.1774.01	0.0222192	0	0	0.0658839	0	0.106689	0	0.0703415	0	0	0.0271008	0	0.158746	0	0	0	0.105669	0	0.195653	0	0.247698	0	0.918	-0.0889179	1.06403
TCGA.29.1776.01	0.0706578	0	0.000398146	0.0732441	0	0.0772068	0	0.0302944	0	0	0	0.0980811	0.169979	0	0	0.00930211	0.128931	0	0.178197	0	0.163708	0	0.628	0.0630334	1.01357
TCGA.29.1777.01	0.430262	0	0.0384588	0.040015	0	0.0586304	0	0.0716002	0.0348471	0.0559595	0	0.0959474	0	0.0541351	0.0358324	0	0.0368603	0.0474516	0	0	0	0	0.109	0.571791	0.817742
TCGA.29.1778.01	0.374108	0	0.0203579	0.077409	0	0.106882	0	0.0391314	0.052331	0	0	0.0959648	0	0.133305	0.00749733	0.0187284	0.0593563	0.0149293	0	0	0	0	0.077	0.647835	0.755676
TCGA.29.1781.01	0.304236	0	0.144737	0	0	0.108728	0	0	0.039606	0	0	0.0267435	0	0.0540193	0.13964	0	0.0504525	0	0	0	0.131837	0	0.02	0.812797	0.609991
TCGA.29.1783.01	0.0727308	0	0.000848963	0.0957348	0	0.0862027	0	0	0.00791602	0	0	0.0800367	0.241284	0	0.0412626	0	0.158929	0	0.0996667	0	0.115389	0	0.649	0.050042	1.01935
TCGA.29.1784.01	0.350755	0	0.0437602	0.0404999	0	0.0841396	0	0.00743145	0.0673104	0	0	0.069209	0.0412999	0.11855	0.108348	0	0.0599055	0	0.00879047	0	0	0	0.057	0.70943	0.714094
TCGA.29.1785.01	0.177546	0	0	0.0898371	0	0.0673437	0	0	0.125826	0.0415667	0	0.103511	0.0573694	0	0.207027	0	0.0895458	0	0.00361646	0	0.0368116	0	0.138	0.501292	0.874019
TCGA.29.2414.02	0.160885	0	0	0.0804496	0	0.0882373	0	0	0.134072	0.072183	0	0	0	0.0502653	0.203866	0	0.0704239	0	0	0	0.139618	0	0.161	0.460961	0.901226
TCGA.29.2414.01	0.0826052	0	0	0.0960059	0	0.0765674	0	0.0354251	0	0	0	0	0.238326	0	0	0	0.11173	0	0.234702	0	0.124639	0	0.761	-0.0105945	1.04067
TCGA.29.2425.01	0.0432434	0	0	0.101468	0	0.0557518	0	0.0400652	0.0284084	0	0	0	0.0818241	0	0.027985	0.103895	0.137191	0	0.210519	0	0.169649	0	0.699	0.028164	1.02013
TCGA.29.2427.01	0.160932	0	0	0.123185	0	0.106282	0	0.0754594	0.0865414	0.052765	0	0.073231	0.0928503	0	0.167398	0	0.00195762	0.0370008	0	0	0	0.0223977	0.11	0.563583	0.831961
TCGA.29.2428.01	0.353048	0	0.0275995	0.0673705	0	0.0991639	0	0.0750109	0.0215333	0	0	0	0	0.10657	0.0975332	0	0.0470951	0	0	0	0.105075	0	0.071	0.662931	0.749087
TCGA.29.A5NZ.01	0.0659838	0	0	0.0890486	0	0.0841523	0	0.00572838	0	0	0	0.0722147	0.144307	0	0.00961291	0	0.147999	0	0.16048	0	0.220473	0	0.738	0.00592483	1.02763
TCGA.30.1714.01	0.0547681	0	0	0.127067	0	0.0695012	0	0.0251579	0	0	0	0.0338752	0.16781	0	0	0	0.173089	0	0.0966901	0	0.25204	0	0.8	-0.0327548	1.04738
TCGA.30.1718.01	0.121408	0	0	0	0	0	0	0	0.0796752	0.0380483	0	0.0661057	0.194462	0.058947	0.0112129	0.0571464	0.0490158	0.110136	0.084629	0	0.129213	0	0.315	0.298765	0.945278
TCGA.30.1853.01	0.0457276	0	0	0.115445	0	0.0552741	0	0.021662	0	0	0	0.0209083	0.162152	0	0	0	0.155771	0	0.175779	0	0.247281	0	0.737	0.00669509	1.02933
TCGA.30.1855.01	0.0784523	0	0.00527486	0.174877	0	0.0290465	0	0	0.0149166	0	0	0.141917	0.17833	0	0.0107039	0	0.183534	0	0.115683	0	0.0606721	0.00659239	0.617	0.069058	1.01569
TCGA.30.1857.01	0.102979	0	0	0.027208	0	0.100957	0	0	0.1115	0	0	0.0526406	0.197482	0.0482393	0.0840749	0	0.0673728	0	0.0846436	0	0.122903	0	0.429	0.196624	0.982621
TCGA.30.1860.01	0.285892	0	0.0299715	0.0472901	0	0.0879426	0	0	0.0928083	0.0554412	0	0.0874172	0.0340123	0.0777461	0.137024	0	0.0644546	0	0	0	0	0	0.1	0.592947	0.803798
TCGA.30.1861.01	0.031302	0	0	0.0683722	0	0.0841965	0	0.0225919	0	0	0	0.010533	0.131118	0	0	0.00120473	0.136544	0	0.263886	0	0.250252	0	0.692	0.0296198	1.02001
TCGA.30.1862.01	0.0536349	0	0.0268536	0	0	0.144673	0	0	0.050559	0	0	0.00243574	0.176319	0	0.00977207	0	0.0927827	0	0.119524	0	0.323446	0	0.63	0.0621955	1.01532
TCGA.30.1866.01	0.095099	0	0	0.141385	0	0.0318749	0	0.0703979	0	0.00554271	0	0.0914629	0.263208	0	0.0189457	0	0.0991117	0.0031118	0.16564	0	0.0142203	0	0.832	-0.0488256	1.05618
TCGA.30.1891.01	0.105752	0	0	0.0682616	0	0.0488458	0	0.0129034	0.0319331	0	0	0.048189	0.135262	0	0.00892152	0	0.138526	0	0.166292	0	0.235115	0	0.646	0.0508522	1.01541
TCGA.30.1892.01	0.0742151	0	0	0.0885316	0	0.0923112	0	0	0.0149617	0	0	0.0433349	0.128518	0	0.000839502	0.000227612	0.181707	0	0.211418	0	0.163937	0	0.642	0.0548647	1.01781
TCGA.31.1944.01	0.158681	0	6.49634e-05	0	0	0	0	0.0699409	0.0811061	0.0794402	0	0.0982942	0.0787231	0	0.0702321	0	0.0944387	0	0.0480462	0	0.212618	0.00841474	0.783	-0.0201075	1.05473
TCGA.31.1946.01	0.0701143	0	0	0.029183	0.00598538	0.00942419	0	0	0.128217	0	0	0.21296	0	0	0.0822776	0	0.0588979	0.0564078	0.213339	0.0266095	0.106585	0	0.582	0.0878567	1.01297
TCGA.31.1950.01	0.0860517	0.00385573	0.0180204	0	0	0	0	0	0	0.0495313	0	0.194583	0.0873172	0	0.0665615	0	0.0357876	0.251472	0.124967	0	0.0818525	0	0.139	0.499457	0.856744
TCGA.31.1951.01	0.060205	0	0	0.1071	0	0.0463472	0	0	0.0911244	0	0	0.0899033	0.0761474	0	0.0651629	0.0864367	0.0915007	0	0.150567	0	0.108878	0.0266273	0.466	0.163771	0.986632
TCGA.31.1953.01	0.0426727	0	0	0.0680312	0	0.0560003	0	0	0.122069	0	0	0.127026	0.0853921	0.0854654	0.122915	0	0.0595233	0	0.124534	0.011989	0.0864356	0.00794717	0.122	0.522659	0.850838
TCGA.31.1956.01	0.339186	0	0.0230455	0.0383149	0	0.0136566	0	0.00566534	0.0778697	0	0	0.0765329	0	0.176044	0.0523257	0	0.0279076	0	0	0	0.149966	0.019486	0.056	0.711263	0.725196
TCGA.31.1959.01	0.0715153	0	0.00771885	0.0252292	0	0.0403384	0	0.0231248	0.124336	0	0.000717304	0.0415816	0.0902974	0	0	0.148846	0.0335825	0.0606443	0.140069	0	0.171094	0.0209061	0.499	0.141253	0.989867
TCGA.36.1568.01	0.118344	0	0	0.113732	0	0.0719416	0	0	0.117828	0	0	0	0.0574998	0	0.033232	0	0.147339	0	0.16617	0	0.173914	0	0.58	0.0896422	1.02052
TCGA.36.1569.01	0.306214	0	0.0103922	0.048053	0	0.0900542	0	0.0630006	0.0126977	0	0	0.00285369	0.0427195	0.111096	0.0194351	0.0283582	0.0510854	0	0.104578	0	0.109463	0	0.111	0.553874	0.825942
TCGA.36.1570.01	0.0872971	0	0	0.0357831	0	0.102369	0	0.110258	0	0	0.0171937	0	0.107108	0	0.00496222	0	0.0485969	0.00663042	0.255375	0	0.224427	0	0.979	-0.140066	1.08136
TCGA.36.1571.01	0.067165	0	0	0.0518365	0	0.0922328	0	0.0651613	0	0	0	0	0.179828	0	0	0	0.0853645	0	0.191016	0	0.267396	0	0.977	-0.134905	1.07201
TCGA.36.1574.01	0.0860934	0	0	0.0999385	0	0.051171	0.00187536	0.0402647	0.0917367	0	0	0.118653	0.035152	0	0.0908268	0	0.114149	0.0930061	0.127084	0.0500492	0	0	0.37	0.252477	0.971442
TCGA.36.1575.01	0.0561545	0	0	0.125002	0	0.00119853	0	0.0580346	0	0	0	0.142173	0.185472	0	0	0	0.13904	0	0.109886	0	0.183039	0	0.758	-0.00868083	1.02987
TCGA.36.1576.01	0.31052	0	0.0342028	0.0486004	0	0.0996788	0	0.0122262	0.0768128	0	0	0	0.0399068	0.144864	0.0824007	0.0128872	0.0762085	0	0.000808902	0	0.0608834	0	0.086	0.62376	0.780333
TCGA.36.1577.01	0.0186891	0	0	0	0	0	0	0.103527	0	0	0	0	0.0502764	0	0	0.112547	0.124757	0.00399629	0.224122	0	0.340489	0.0215975	0.706	0.0244848	1.01181
TCGA.36.1578.01	0.184553	0	0.0151622	0.066038	0	0.0562892	0	0.11249	0	0.0143601	0	0	0.118654	0.0604939	0.0815239	0	0.0394645	0.0990214	0.0603055	0	0.0916439	0	0.182	0.429091	0.894545
TCGA.36.1580.01	0.057278	0	0	0.176205	0	0.0538974	0	0	0.00385317	0	0	0.0696375	0.159719	0	0.0284086	0	0.180089	0	0.11884	0	0.152072	0	0.597	0.0799228	1.01393
TCGA.36.1581.01	0.4379	0	0.0519316	0	0	0.0850726	0	0.00991178	0.0734829	0	0	0.0955403	0.0118254	0	0.104091	0.0310596	0.00488586	0	0	0	0.0360975	0.0582013	0.044	0.739888	0.681585
TCGA.3P.A9WA.01	0.0756325	0	0	0	0	0.00524793	0	0.112074	0	0	0.0769067	0.00545793	0	0	0	0.0677497	0.190839	0	0.15586	0	0.258934	0.0512983	0.991	-0.157681	1.05325
TCGA.57.1582.01	0.241388	0	0.000750534	0.0926443	0	0.145879	0	0	0.0644467	0	0	0	0.0132069	0	0.0310099	0	0.125212	0	0.138446	0	0.147017	0	0.571	0.0937309	1.04706
TCGA.57.1583.01	0.0481694	0	0	0.126791	0	0.0520249	0	0.112681	0.0303158	0	0.0903602	0.0383883	0	0	0	0	0.112053	0.0701901	0.114932	0	0.19616	0.00793476	0.735	0.00984218	1.05084
TCGA.57.1584.01	0	0.00352342	0.0273419	0	0	0.0162977	0.00982228	0.102214	0	0	0	0.00320637	0.191112	0	0	0.0697944	0.0596412	0.0111215	0.28991	0	0.216015	0	0.991	-0.157772	1.04583
TCGA.57.1585.01	0.159185	0	0.00339008	0.106582	0	0.0911966	0	0	0.0337395	0	0	0.0746829	0.138964	0	0.00463948	0	0.119061	0	0.164076	0	0.104483	0	0.537	0.11797	1.0113
TCGA.57.1586.01	0.11865	0	0.000815354	0.0642711	0	0.119898	0	0.0749866	0	0	0	0	0.17523	0	0.0233864	0	0.0678683	0	0.195846	0	0.159048	0	0.871	-0.0678275	1.07083
TCGA.57.1993.01	0.0252462	0	0.000133988	0.137846	0	0.0918075	0	0.0556198	0	0	0	0.0658694	0.043857	0	0	0	0.131935	0	0.204011	0	0.194242	0.0494327	0.663	0.0394788	1.03484
TCGA.57.1994.01	0.186885	0	0.00583347	0.112365	0	0.100389	0	0	0.0255045	0	0	0.0423646	0	0.0453093	0.0723837	0	0.137622	0	0.0919665	0	0.179376	0	0.426	0.200842	0.988296
TCGA.59.2348.01	0.165171	0	0.00452718	0.213529	0	0.0204237	0	0	0.0268292	0	0	0.0464749	0.069544	0	0	0.0159714	0.243083	0	0.0950435	0	0.0994028	0	0.572	0.0928466	1.02484
TCGA.59.2350.01	0.0269678	0	0	0.0832479	0	0.0940201	0	0.0340892	0	0	0	0.10144	0.187125	0	0.000235384	0.00137967	0.103662	0	0.197603	0	0.170229	0	0.649	0.0501512	1.01962
TCGA.59.2351.01	0.412094	0	0.0508697	0.0581797	0	0.122548	0	0.00918901	0.0598272	0	0	0.0343614	0.00796516	0.106084	0.0228449	0	0.0607471	0	0.0136737	0	0.0416158	0	0.056	0.710533	0.700552
TCGA.59.2352.01	0.239697	0	0.0298476	0.0837691	0	0.0620233	0	0.0375044	0.00631414	0	0	0.12136	0.0320572	0	0.0186614	0.0113566	0.115346	0	0.133474	0	0.108589	0	0.401	0.2238	0.981215
TCGA.59.2354.01	0.127154	0	0	0.0790618	0	0.0973029	0	0.00553438	0.0345232	0.00478059	0	0.0376574	0.0420279	0	0.0360246	0	0.110635	0	0.171209	0	0.254089	0	0.578	0.0903961	1.01182
TCGA.59.2355.01	0.0912716	0	0	0.120898	0	0.0420351	0	0.0212607	0	0	0	0.0957577	0.178108	0	0.0126571	0	0.1227	0	0.164653	0	0.150659	0	0.658	0.0442583	1.01904
TCGA.59.2363.01	0.0480032	0	0	0.120952	0	0.0801721	0	0.0632046	0	0	0.0277602	0	0.0944735	0	0	0.0853038	0.108994	0.00945926	0.205208	0	0.15647	0	0.743	0.00391616	1.03909
TCGA.59.A5PD.01	0.14593	0	0.00369192	0.0561948	0	0.12583	0	0	0.0249375	0	0	0	0.0477099	0.00496403	0.0625625	0	0.130763	0	0.067421	0	0.329997	0	0.82	-0.0443366	1.06474
TCGA.5X.AA5U.01	0.0495995	0	0	0.0738805	0	0.0693299	0	0.00826255	0.00960125	0	0	0.0150043	0.218269	0	0	0	0.172504	0	0.19286	0	0.19069	0	0.889	-0.0762116	1.04585
TCGA.61.1721.01	0.125454	0	0.00138252	0.0474403	0	0.0641308	0	0.0884842	0	0	0	0.0231206	0.121089	0.140119	0	0.0826427	0.0822918	0	0.123592	0	0.100253	0	0.526	0.12744	1.00018
TCGA.61.1724.01	0.0382922	0	0	0.0911016	0	0.0648224	0	0	0.0584981	0	0	0.1281	0.159452	0	0.0424583	0	0.12176	0	0.207174	0	0.0883411	0	0.664	0.0389738	1.01778
TCGA.61.1725.01	0.188923	0	0	0.0460808	0	0.0948481	0	0.0143912	0.0292635	0	0	0.110931	0.0798442	0	0.048121	0	0.0867608	0.0122156	0.138965	0	0.149655	0	0.648	0.0505334	1.03211
TCGA.61.1728.01	0.0267987	0	0	0.120614	0	0.114639	0	0.0666977	0	0	0	0.0773177	0.11565	0	0.00383764	0	0.0962785	0.00499721	0.2147	0	0.0650471	0.093423	0.85	-0.058568	1.07503
TCGA.61.1733.01	0.0295887	0	0	0.0730958	0	0.0653257	0	0.0139916	0	0	0	0.10507	0.163243	0	0	0.00798755	0.197499	0	0.267784	0	0.0764147	0	0.63	0.0618938	1.00959
TCGA.61.1736.01	0.0133005	0	0	0.117051	0	0.0956056	0	0.0717661	0	0	0.0586115	0.0101716	0.0893435	0	0	0	0.102808	0.118615	0.184086	0	0.118073	0.0205677	0.765	-0.0133005	1.05702
TCGA.61.1737.01	0.0624829	0	0	0	0	0	0	0	0.0397117	0.0419625	0	0.0985184	0.12782	0	0.0361709	0.0806566	0.0875248	0.125371	0.195761	0	0.104021	0	0.499	0.142421	0.98824
TCGA.61.1738.01	0.206829	0	0.0263186	0.0168311	0	0.000943603	0	0.0925048	0.052074	0.0820565	0	0	0	0	0	0	0.00122818	0.342507	0.0223793	0	0.156328	0	0.074	0.652518	0.763302
TCGA.61.1740.01	0.440096	0	0.0276646	0.0151366	0	0.0572587	0	0.00791487	0.0739993	0	0	0.120791	0	0.113031	0.0566424	0	0.085045	0	0	0	0	0.00242058	0.042	0.744496	0.674278
TCGA.61.1741.01	0.429701	0	0.0497511	0.0321174	0	0.0767626	0	0.00742146	0.0992207	0	0	0.0889318	0	0.0357413	0.0407007	0	0.0611724	0	0	0	0.0784799	0	0.114	0.543408	0.83869
TCGA.61.1743.01	0.170978	0	0	0	0	0	0	0.0118352	0	0.00778473	0	0.348162	0.0262547	0	0.0035256	0	0.0909518	0.0900166	0.214924	0	0.035567	0	0.607	0.0759277	1.00717
TCGA.61.1900.01	0.0839466	0	0	0	0	0	0	0.142174	0	0	0	0	0	0	0	0.128619	0.190914	0	0.0790934	0.0614042	0.313849	0	0.999	-0.213787	1.06702
TCGA.61.1907.01	0.23278	0	0.0409095	0.0409274	0	0.0204755	0	0.11111	0.105264	0.0562372	0	0.120585	0.0594717	0.0115419	0.0889888	0.0221755	0.0488749	0	0.00825442	0.0324043	0	0	0.184	0.426184	0.898861
TCGA.61.1910.01	0.074151	0	0	0.209935	0	0	0	0.00761317	0	0	0	0.241298	0.160786	0	0	0.044174	0.154987	0.0271248	0.0799301	0	0	0	0.662	0.040266	1.02232
TCGA.61.1911.01	0.176825	0	0.0406383	0.0882767	0	0.119307	0	0.0127196	0	0	0	0.0540027	0	0.0499635	0.0796493	0	0.0737165	0	0.12834	0	0.176561	0	0.3	0.308804	0.946038
TCGA.61.1914.01	0.467334	0	0.0205756	0.0386293	0	0.050415	0	0.0701217	0.0618482	0.0273318	0	0.0743086	0	0.0446316	0.0282548	0	0.0566753	0.059874	0	0	0	0	0.094	0.605458	0.792734
TCGA.61.1917.01	0.0461	0	0	0.100106	0	0.0504452	0	0.0112562	0.0790823	0	0	0.112388	0.0807525	0	0.0531327	0.165562	0.0791187	0	0.147297	0	0.0650377	0.00972223	0.5	0.139991	0.991139
TCGA.61.1918.01	0.103146	0	0	0.0903401	0	0.137341	0	0.0641401	0	0	0	0.018993	0.153196	0	0.0257248	0	0.109899	0	0.183049	0	0.11417	0	0.794	-0.0289468	1.06359
TCGA.61.1919.01	0.236448	0	0.0234512	0.0534184	0	0.11364	0	0	0.0278094	0	0	0.144375	0.0126493	0.0550364	0.0609092	0.016839	0.0758222	0	0.0988723	0.00769883	0.0618133	0.011218	0.263	0.343371	0.930909
TCGA.61.1995.01	0.0828429	0	0	0.147313	0	0.0994006	0	0.0307052	0.0350863	0	0.12954	0	0.0135333	0	0.0062395	0.00758453	0.188208	0	0.162541	0	0.0970051	0	0.603	0.0771565	1.03049
TCGA.61.1998.01	0.0440846	0	0	0.0950245	0	0.058655	0	0.0486021	0.00382705	0	0.0218905	0.0146346	0.0652027	0	0	0.0900062	0.150415	0.00594254	0.220216	0	0.161606	0.0198925	0.661	0.0406447	1.01841
TCGA.61.2000.01	0.0632289	0	0	0.00635806	0	0.0839508	0.270457	0	0.0831345	0	0	0.183992	0.0375879	0	0.00899302	0.0719386	0.124331	0.0185543	0	0.0474742	0	0	0.754	-0.00284078	1.03924
TCGA.61.2002.01	0.160519	0	0	0.0822731	0	0.0649946	0	0.0470871	0.0590446	0.0426719	0	0.0466409	0.137354	0.112586	0.106224	0	0.0481807	0.0486735	0.0243162	0	0	0.0194344	0.119	0.530257	0.842259
TCGA.61.2003.01	0.0615479	0	0.000798109	0.169322	0	0.069218	0	0	0	0	0	0.104475	0.154887	0	0.00205054	0	0.173576	0	0.159238	0	0.104887	0	0.578	0.0902787	1.01365
TCGA.61.2008.02	0.137683	0	0	0.100239	0	0.0919093	0	0	0.0623684	0	0	0	0	0	0.149554	0	0.107716	0	0.143533	0	0.206996	0	0.258	0.346593	0.937527
TCGA.61.2008.01	0.0962516	0	0.00247306	0.121756	0	0.0828623	0	0.0185052	0	0	0	0.0483136	0.12257	0	0.0128539	0	0.163341	0	0.0799298	0	0.251143	0	0.687	0.0329098	1.03078
TCGA.61.2009.01	0.163663	0	0	0.0799283	0	0.130069	0	0	0.0123547	0	0	0.0528677	0.020628	0.00648795	0.138513	0	0.112881	0	0.113351	0	0.16751	0.00174662	0.282	0.323094	0.947215
TCGA.61.2012.01	0.0689267	0.00751174	0.0645754	0.0308454	0	0.138731	0	0.005742	0	0	0	0	0	0.00956623	0.125067	0	0.0771378	0	0.124837	0	0.276201	0.0708594	0.25	0.356767	0.926219
TCGA.61.2016.01	0.0582748	0	1.75992e-05	0.060501	0	0.0781901	0	0.0472525	0.0207433	0	0.0474541	0	0.109384	0.0221543	0	0.04841	0.0510888	0.061732	0.225989	0	0.168808	0	0.737	0.00742449	1.02848
TCGA.61.2088.01	0.0228614	0	0	0.21909	0	0	0	0.0829127	0	0	0	0.152037	0.0751634	0.0117282	0	0	0.18086	0	0.066169	0	0.135113	0.0540657	0.675	0.0363717	1.03746
TCGA.61.2092.01	0.270468	0	0.050246	0	0	0	0	0.168913	0	0	0	0	0.0714641	0.193206	0	0	0.0948917	0.150811	0	0	0	0	0.545	0.112054	1.04545
TCGA.61.2094.01	0.373447	0	0.036365	0.0363603	0	0.041437	0	0.0942545	0.0319524	0	0	0	0	0.125179	0.0323198	0	0.036794	0	0	0	0.166766	0.0251255	0.055	0.717745	0.702669
TCGA.61.2095.01	0.0145527	0	0	0.0833269	0	0.0977256	0	0.0325263	0.0134285	0	0.0313353	0.100795	0.118772	0.121726	0	0.0420446	0.080704	0	0.141899	0	0.0961666	0.0249976	0.631	0.0614704	1.01971
TCGA.61.2097.01	0.034678	0	0	0	0	0	0.0228133	0	0	0	0	0.135502	0.18146	0.0774706	0	0.104103	0.091412	0.0208578	0.123131	0.101739	0.0439086	0.0629243	0.333	0.282181	0.962262
TCGA.61.2098.01	0.0548879	0	0	0.064402	0	0.065756	0	0.0394551	0	0	0	0	0.192385	0	0	0	0.109936	0	0.220414	0	0.252765	0	0.931	-0.0950587	1.05133
TCGA.61.2101.01	0.0494089	0	0	0.100071	0	0.0640277	0	0.0152262	0.0392268	0	0.034944	0	0.0815271	0	0	0.0743893	0.110211	0.0428782	0.240706	0	0.147383	0	0.899	-0.0794393	1.04988
TCGA.61.2102.01	0.0198794	0	0	0.021034	0	0.0435283	0	0.0861599	0	0	0	0.0306535	0.0959809	0	0	0.12279	0.154196	0.00418587	0.200236	0	0.221357	0	0.87	-0.0665776	1.03136
TCGA.61.2104.01	0.210169	0	0.0198851	0.0730435	0	0.0810833	0	0	0.102854	0.0495315	0	0.0902639	0.0879896	0	0.044001	0	0.0755491	0.061323	0	0	0.104307	0	0.438	0.192833	1.00166
TCGA.61.2109.01	0.0269297	0	0	0.0705431	0	0.110314	0	0.0343926	0	0	0	0.0858278	0.210735	0	0	0	0.0870713	0	0.237541	0	0.136645	0	0.692	0.0297211	1.02619
TCGA.61.2110.01	0.0271919	0	0	0.127144	0	0.118528	0	0.0375323	0	0	0.0868886	0	0.076854	0	0	0.0399213	0.12107	0	0.21336	0	0.15151	0	0.62	0.0660079	1.02782
TCGA.61.2111.01	0.0562515	0	0	0	0	0.00684926	0	0.101559	0	0	0	0	0.102772	0	0	0.119016	0.122852	0	0.303937	0	0.186763	0	0.738	0.00602817	1.01575
TCGA.61.2113.01	0.0210565	0	0	0.00993376	0	0.0218054	0	0	0.0430637	0.00366112	0	0.181288	0.0578741	0	0.0564325	0.115636	0.0233249	0.0231124	0.222818	0	0.164524	0.0554696	0.411	0.21324	0.96991
TCGA.OY.A56P.01	0.0448166	0	0	0.0684367	0	0.0721302	0	0.00436882	0.00657961	0	0	0.00414367	0.188347	0	0	0	0.124219	0	0.177112	0	0.309846	0	0.935	-0.0994738	1.05019
TCGA.OY.A56Q.01	0.0269002	0	0	0.186742	0	0.065872	0	0.0214154	0	0	0.0361378	0.0444462	0.0723374	0	0	0	0.247197	0	0.0437181	0	0.255234	0	0.766	-0.013748	1.05247
TCGA.VG.A8LO.01	0.0325838	0	0	0.037064	0	0.0430332	0	0.0986065	0	0	0	0	0.184003	0.0095347	0	0	0.0652405	0.0457558	0.17829	0	0.305888	0	0.895	-0.0781225	1.04486
TCGA.WR.A838.01	0.0435882	0	0	0.0809623	0	0.0600462	0	0.0803906	0	0	0	0.131117	0.182002	0	0	0	0.119937	0.0168831	0.216214	0	0.0688613	0	0.944	-0.106176	1.058
