# Supplementary material for: Multifactor assessment of ovarian cancer reveals immunologically interpretable molecular subtypes with distinct prognoses
Source: Front Immunol. 2023 Dec 7;14:1326018. doi: 10.3389/fimmu.2023.1326018 (PMC10740166; doi:10.3389/fimmu.2023.1326018)
Supplement: Supplementary file 6 [file Table_5.xlsx]

## Sheet: TCGA
Table S5. Analysis results of 33 feature genes in TCGA.
gene	UniProt ID	HR_group	p_group	HR	p	logrank_p
GMPR	P36959	0.603234	5.27299e-05	0.999893	0.000378498	4.45259e-05
CALR	P27797	0.75231	0.0226703	0.999997	0.434417	0.0221814
DIAPH2	O60879	0.758556	0.0251159	0.999722	0.0924408	0.0245847
TAP1	Q03518	0.727275	0.0102161	0.999945	0.000318212	0.00989455
BAG2	O95816	0.738323	0.0143698	0.99973	0.00677055	0.0140435
GFPT2	O94808	1.33408	0.0197264	1.00036	0.0129416	0.0192761
SNRPA1	P09661	0.684814	0.00251968	0.999691	0.000138649	0.0023757
MFAP4	P55083	1.33367	0.0203105	1.00003	0.0105281	0.0198145
ARF5	P84085	0.717127	0.00728991	0.999987	0.481052	0.00702817
RAPGEF3	O95398	1.40205	0.00645352	1.00001	0.590092	0.00621333
ANKZF1	Q9H8Y5	1.35433	0.015255	1.00007	0.287811	0.0150987
RXRA	P19793	1.28843	0.0398987	1.00014	0.00911557	0.0390654
TEAD1	P28347	1.38569	0.00831799	1.00009	0.00179993	0.00801553
HSPE1	P61604	0.754496	0.0228356	0.999963	0.0178296	0.0223267
HMGB3	O15347	0.696594	0.00394784	0.999863	0.00282102	0.00375432
TCF20	Q9UGU0	1.31069	0.0285515	1.00009	0.126257	0.0282306
EPS8	Q12929	1.37709	0.0100718	1.00014	0.085504	0.0097728
COA4	Q9NYJ1	0.740662	0.015354	0.999952	0.171539	0.0149075
ANGPTL4	Q9BY76	1.38742	0.00823177	1.00024	0.000345659	0.00797396
CD38	P28907	0.586767	2.38416e-05	0.999406	0.00943497	1.92458e-05
PMVK	Q15126	0.720905	0.00820969	0.999863	0.0415596	0.00790851
PSME1	Q06323	0.772352	0.036519	0.999983	0.144728	0.0360677
PDE4A	P27815	1.44429	0.00316851	1.00013	0.139014	0.00300978
NME1	P15531	0.699066	0.00393622	0.999977	0.169777	0.00370486
CNPY2	Q9Y2B0	0.696694	0.00397503	0.999939	0.0764465	0.00379969
GINS2	Q9Y248	0.757441	0.0246245	0.999707	0.0709074	0.0242183
CX3CR1	P49238	1.46804	0.00203531	1.00015	0.0123846	0.00191617
KLHL36	Q8N4N3	1.41402	0.00572208	1.00019	0.041413	0.00544888
GPS1	Q13098	0.735514	0.0131713	0.999959	0.0964073	0.0128625
MRPL34	Q9BQ48	0.763172	0.0290072	0.999973	0.420455	0.0282495
NCAPG2	Q86XI2	0.783332	0.048135	0.999952	0.637345	0.0472461
TRAPPC2	P0DI81	0.69588	0.00345414	0.99973	0.202167	0.00326714
CHST15	Q7LFX5	1.27838	0.0475274	1.00006	0.114871	0.0404708

## Sheet: GEO
Table S5. Analysis results of 33 feature genes in GEO.
gene	UniProt ID	HR_group	p_group	HR	p	logrank_p
GMPR	P36959	0.580786	0.00240328	0.996639	0.000279833	0.00171444
CALR	P27797	0.58718	0.00325643	0.998967	0.000296949	0.00181222
DIAPH2	O60879	1.56149	0.0127989	1.01231	0.0405141	0.0021567
TAP1	Q03518	0.593613	0.0037326	0.998752	0.00781107	0.00347325
BAG2	O95816	1.6422	0.00666707	1.00403	0.282943	0.00461629
GFPT2	O94808	1.69886	0.00323516	1.00898	2.02006e-05	0.00513428
SNRPA1	P09661	0.635439	0.0112654	0.998048	0.22509	0.0065657
MFAP4	P55083	1.51201	0.0196378	1.00134	0.0415708	0.00987176
ARF5	P84085	0.616861	0.00785312	0.997846	0.000927285	0.00991014
RAPGEF3	O95398	0.616745	0.00828971	0.998685	0.230515	0.0116345
ANKZF1	Q9H8Y5	0.669254	0.0237721	0.991887	0.00448903	0.0156074
RXRA	P19793	1.55723	0.0126736	1.00423	0.0343722	0.0160051
TEAD1	P28347	1.43636	0.0427572	1.02609	0.0513045	0.0161821
HSPE1	P61604	0.67895	0.0300186	0.99967	0.540475	0.0187599
HMGB3	O15347	0.607991	0.0057258	0.997853	0.0957205	0.0190604
TCF20	Q9UGU0	0.653329	0.0190695	0.997828	0.182866	0.0196074
EPS8	Q12929	1.55516	0.0147838	1.0018	0.110163	0.0220049
COA4	Q9NYJ1	0.659235	0.0201479	0.997128	0.0185144	0.0220264
ANGPTL4	Q9BY76	0.67802	0.0302505	0.996363	0.435799	0.023983
CD38	P28907	0.696852	0.0411818	0.995675	0.134855	0.0260982
PMVK	Q15126	0.65045	0.0166824	0.9948	0.00699487	0.0290001
PSME1	Q06323	0.701358	0.0467567	0.999429	0.00574136	0.0297346
PDE4A	P27815	0.700137	0.0445587	0.994663	0.130006	0.0310474
NME1	P15531	0.666048	0.0256496	0.999845	0.48561	0.0339094
CNPY2	Q9Y2B0	0.660112	0.0215778	0.999358	0.206744	0.0339312
GINS2	Q9Y248	0.694599	0.0397203	0.998271	0.337755	0.0355086
CX3CR1	P49238	1.48851	0.0264768	1.00047	0.710747	0.0370306
KLHL36	Q8N4N3	0.70511	0.0480456	0.971819	0.157659	0.0371839
GPS1	Q13098	0.695012	0.0430925	0.99496	0.00364688	0.0428056
MRPL34	Q9BQ48	0.71547	0.0609162	0.997922	0.0618332	0.0428157
NCAPG2	Q86XI2	0.698316	0.0431326	0.989762	0.0136616	0.0446104
TRAPPC2	P0DI81	0.722163	0.0677631	0.992885	0.224815	0.0489859
CHST15	Q7LFX5	1.43269	0.0437623	1.00563	0.000622372	0.0495614
